# Supplementary material
Source: PubMed Central journal article supplement (PMC3786721)
Supplement: JCI69854sd.pdf [file JCI69854sd.pdf]

## Romberg et al 2013

*TACI* mutations associated with CVID affect autoreactive B-cell selection and activation

### ***Supplemental Materials:***

#### Supplemental Figures 1-8

**Supplemental Figure 1.** Naïve B cells with two *TACI* mutations have defective induction of ICOSL but not CD25

**Supplemental Figure 2.** The TACI ligand APRIL potentiates TLR7 and TLR9 mediated activation of healthy donor splenic B cells

**Supplemental Figure 3.** Coprecipitation of TACI and the activated/cleaved 65 kDa form of TLR9 in 2E2 cells under multiple activating conditions

**Supplemental Figure 4.** Limited BAFF and absent APRIL secretion by healthy donor splenic B cells

**Supplemental Figure 5.** Persistence of polyreactive mature naïve B cells in the blood of representative CVID patients

**Supplemental Figure 6.** Persistence of autoreactive mature naïve B cells in the blood of CVID patients

**Supplemental Figure 7.** CVID disease status but not *TACI* mutation carrier status is associated with an altered Treg phenotype

**Supplemental Figure 8.** Predominant Th2 serum cytokines in CVID patients with a single *TACI* mutation

#### Supplemental Tables 1-35

**Supplemental Table 1.** Characteristics of healthy donors and CVID patients with *TACI* mutations

**Supplemental Table 2.** Repertoire and reactivity of antibodies from new emigrant B cells of healthy donor 29.

**Supplemental Table 3.** Repertoire and reactivity of antibodies from new emigrant B cells of healthy donor G.II

**Supplemental Table 4.** Repertoire and reactivity of antibodies from new emigrant B cells of healthy donor E.V

**Supplemental Table 5.** Repertoire and reactivity of antibodies from new emigrant B cells of healthy donor E.II

**Supplemental Table 6.** Repertoire and reactivity of antibodies from new emigrant B cells of healthy donor D.III

**Supplemental Table 7.** Repertoire and reactivity of antibodies from new emigrant B cells of CVID patient 321

**Supplemental Table 8.** Repertoire and reactivity of antibodies from new emigrant B cells of CVID patient Y17

**Supplemental Table 9.** Repertoire and reactivity of antibodies from new emigrant B cells of CVID patient B.I

**Supplemental Table 10.** Repertoire and reactivity of antibodies from new emigrant B cells of CVID patient G.I

**Supplemental Table 11.** Repertoire and reactivity of antibodies from new emigrant B cells of CVID patient A.II.1

**Supplemental Table 12.** Repertoire and reactivity of antibodies from new emigrant B cells of CVID patient 1001

**Supplemental Table 13.** Repertoire and reactivity of antibodies from new emigrant B cells of CVID patient C12

**Supplemental Table 14.** Repertoire and reactivity of antibodies from new emigrant B cells of CVID patient 218

**Supplemental Table 15.** Repertoire and reactivity of antibodies from new emigrant B cells of CVID patient 251

**Supplemental Table 16.** Repertoire and reactivity of antibodies from new emigrant B cells of CVID patient 170

**Supplemental Table 17.** Repertoire and reactivity of antibodies from new emigrant B cells of CVID patient 124

**Supplemental Table 18.** Repertoire and reactivity of antibodies from new emigrant B cells of CVID patient 332

**Supplemental Table 19.** Repertoire and reactivity of antibodies from mature naïve B cells of healthy donor 29

**Supplemental Table 20.** Repertoire and reactivity of antibodies from mature naïve B cells of healthy donor G.II

**Supplemental Table 21.** Repertoire and reactivity of antibodies from mature naïve B cells of healthy donor E.V

**Supplemental Table 22.** Repertoire and reactivity of antibodies from mature naïve B cells of healthy donor E.II

**Supplemental Table 23.** Repertoire and reactivity of antibodies from mature naïve B cells of healthy donor D.III

**Supplemental Table 24.** Repertoire and reactivity of antibodies from mature naïve B cells of CVID patient 321

**Supplemental Table 25.** Repertoire and reactivity of antibodies from mature naïve B cells of CVID patient Y17

**Supplemental Table 26.** Repertoire and reactivity of antibodies from mature naïve B cells of CVID patient LB

**Supplemental Table 27.** Repertoire and reactivity of antibodies from mature naïve B cells of CVID patient G.I

**Supplemental Table 28.** Repertoire and reactivity of antibodies from mature naïve B cells of CVID patient A.II.1

**Supplemental Table 29.** Repertoire and reactivity of antibodies from mature naïve B cells of CVID patient 1001

**Supplemental Table 30.** Repertoire and reactivity of antibodies from mature naïve B cells of CVID patient C12

**Supplemental Table 31.** Repertoire and reactivity of antibodies from mature naïve B cells of CVID patient 218

**Supplemental Table 32.** Repertoire and reactivity of antibodies from mature naïve B cells of CVID patient 251

**Supplemental Table 33.** Repertoire and reactivity of antibodies from mature naïve B cells of CVID patient 170

**Supplemental Table 34.** Repertoire and reactivity of antibodies from mature naïve B cells of CVID patient 124

**Supplemental Table 35.** Repertoire and reactivity of antibodies from mature naïve B cells of CVID patient 332

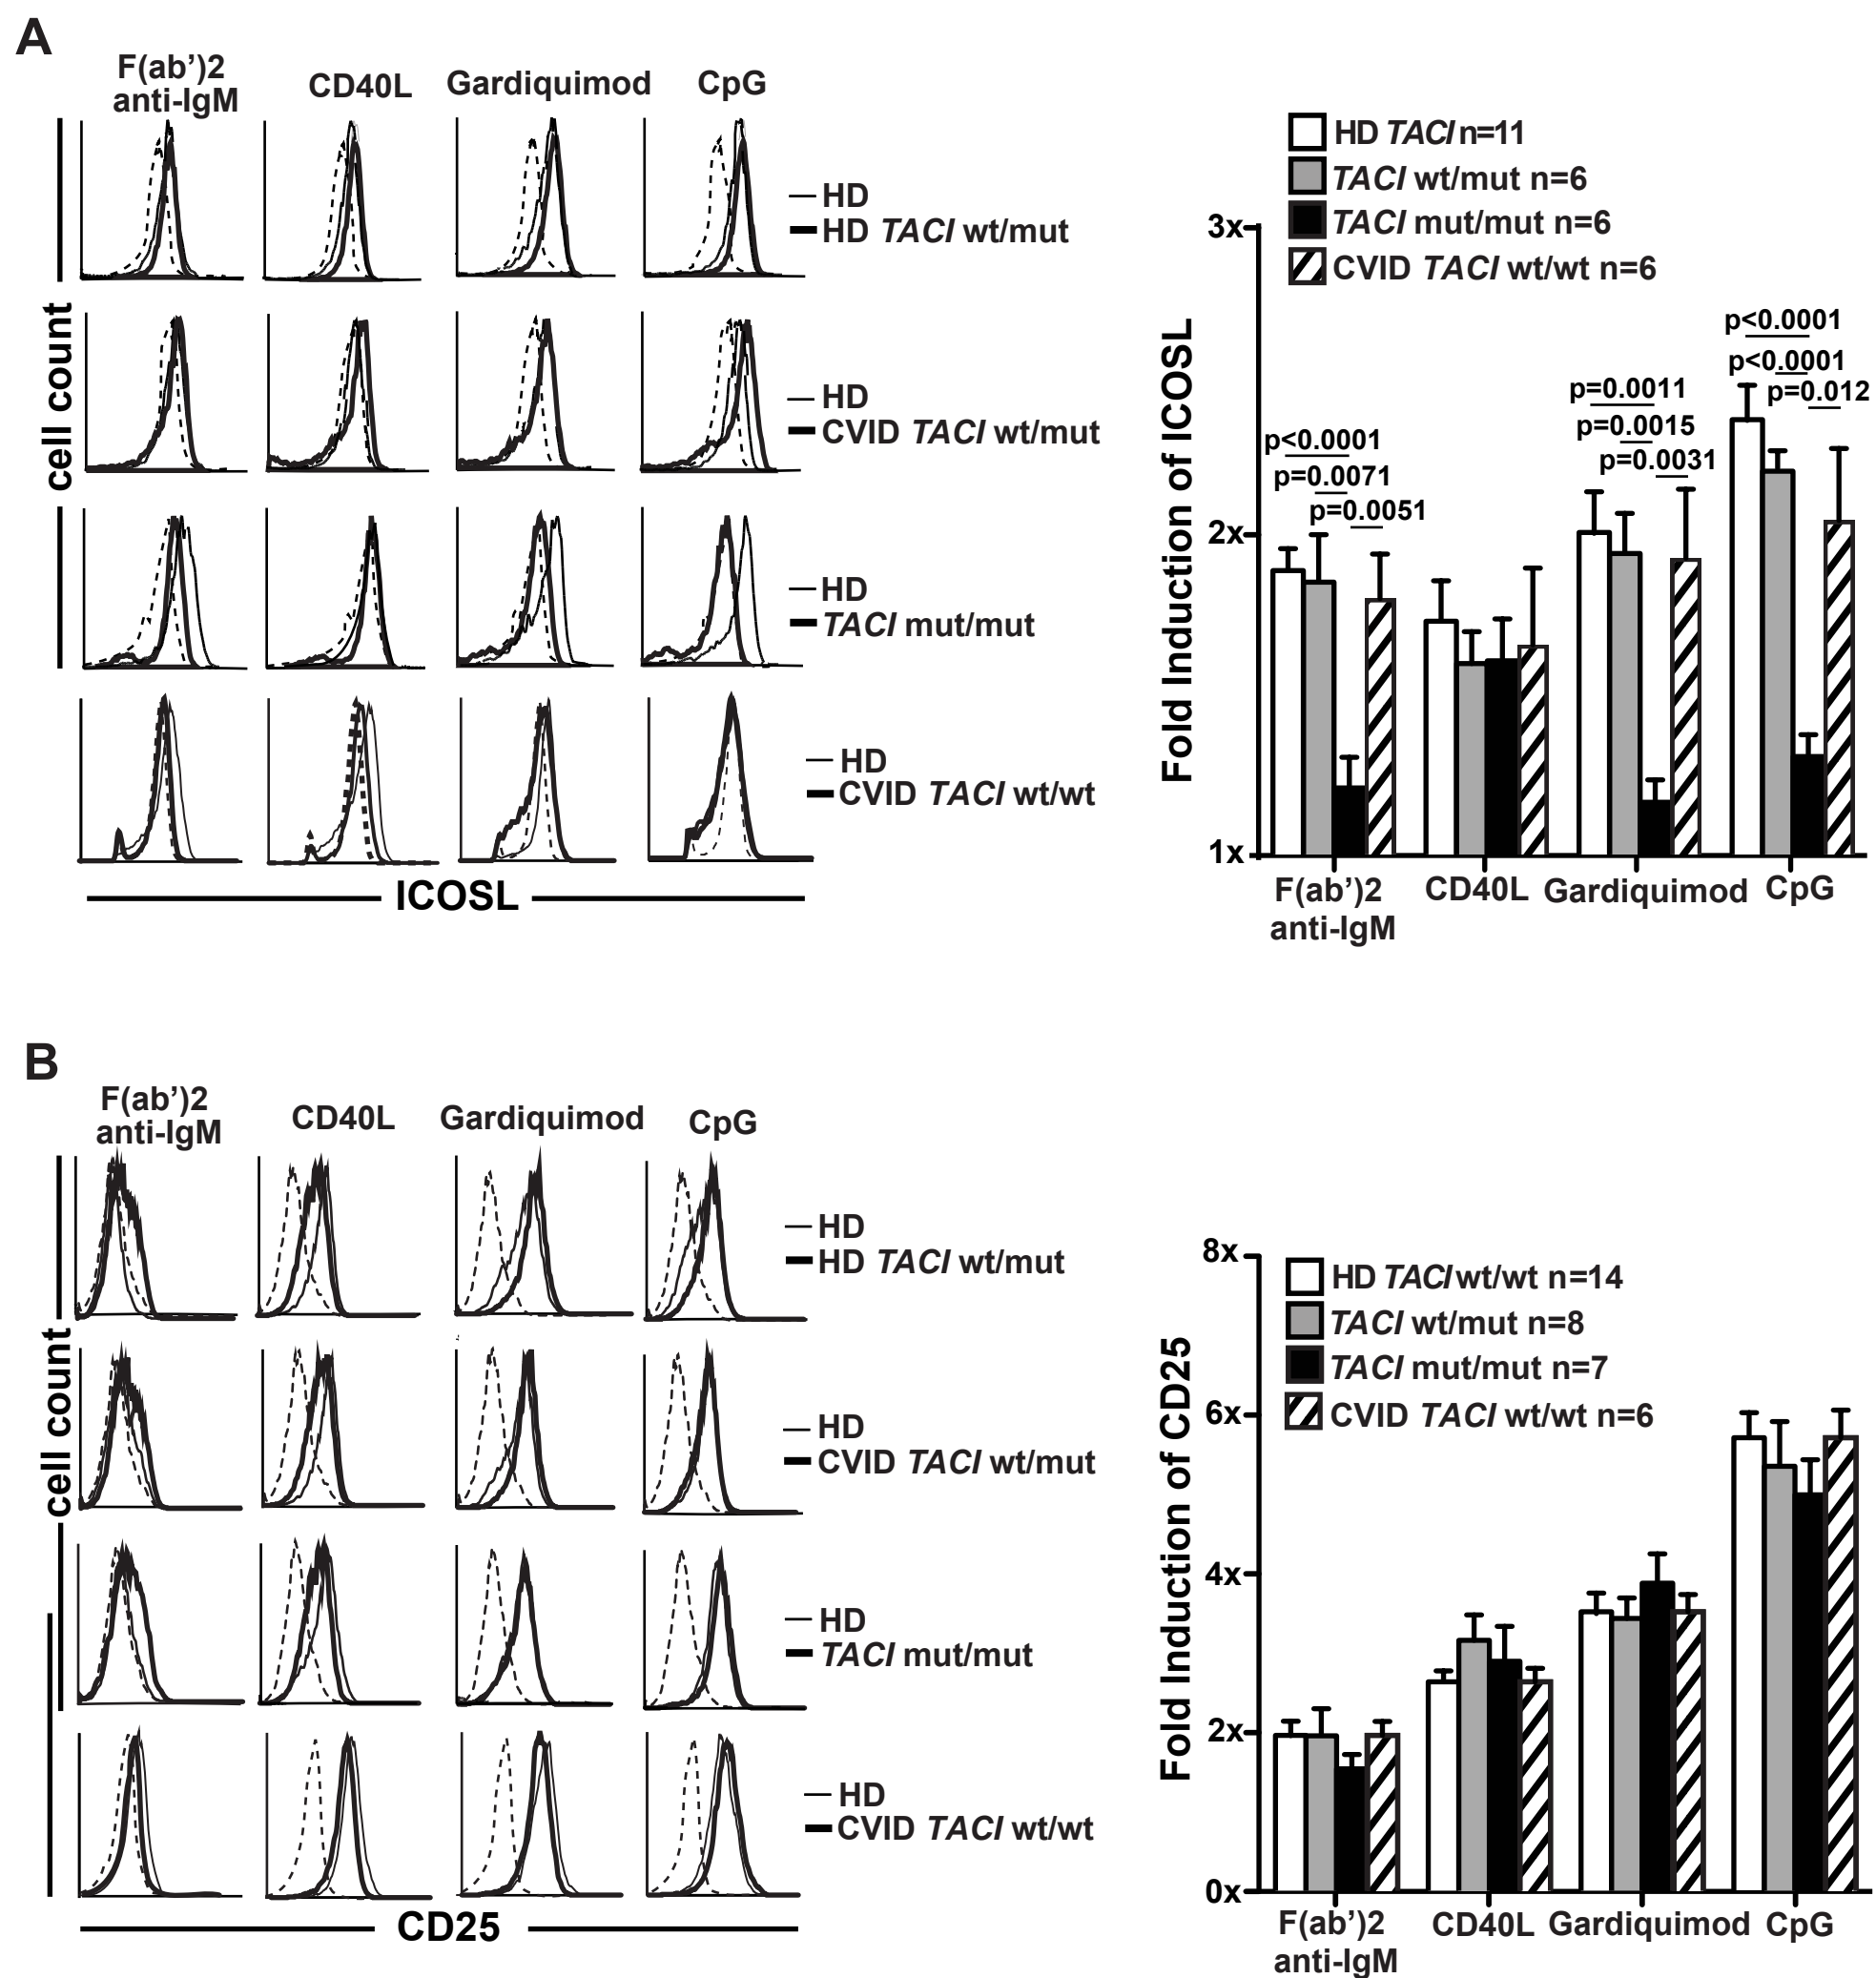

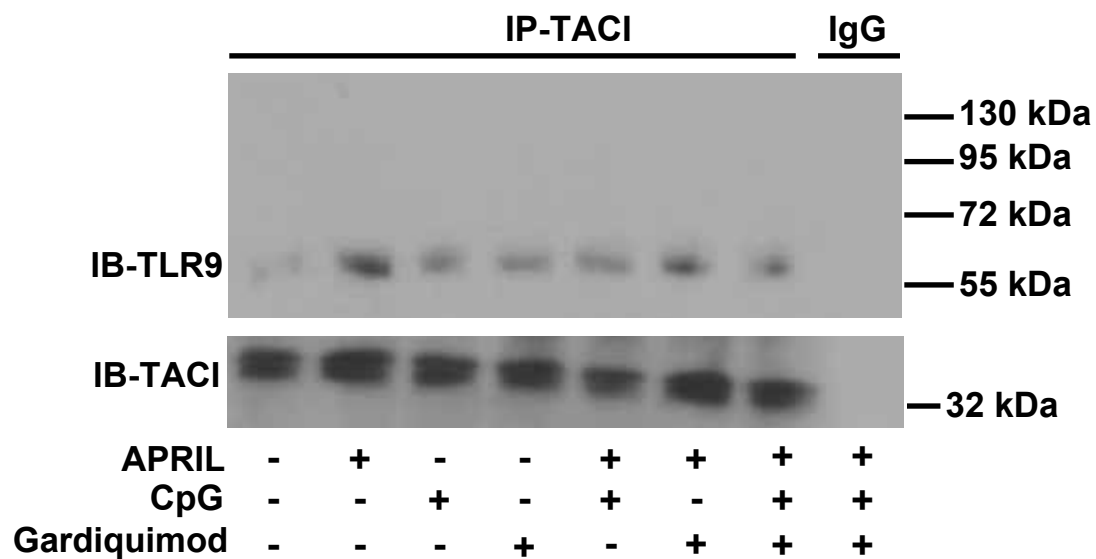

**Supplemental Figure 2.** Coprecipitation of TAC1 and the activated/cleaved 65 kDa form of TLR9 in 2E2 cells under multiple activating conditions.

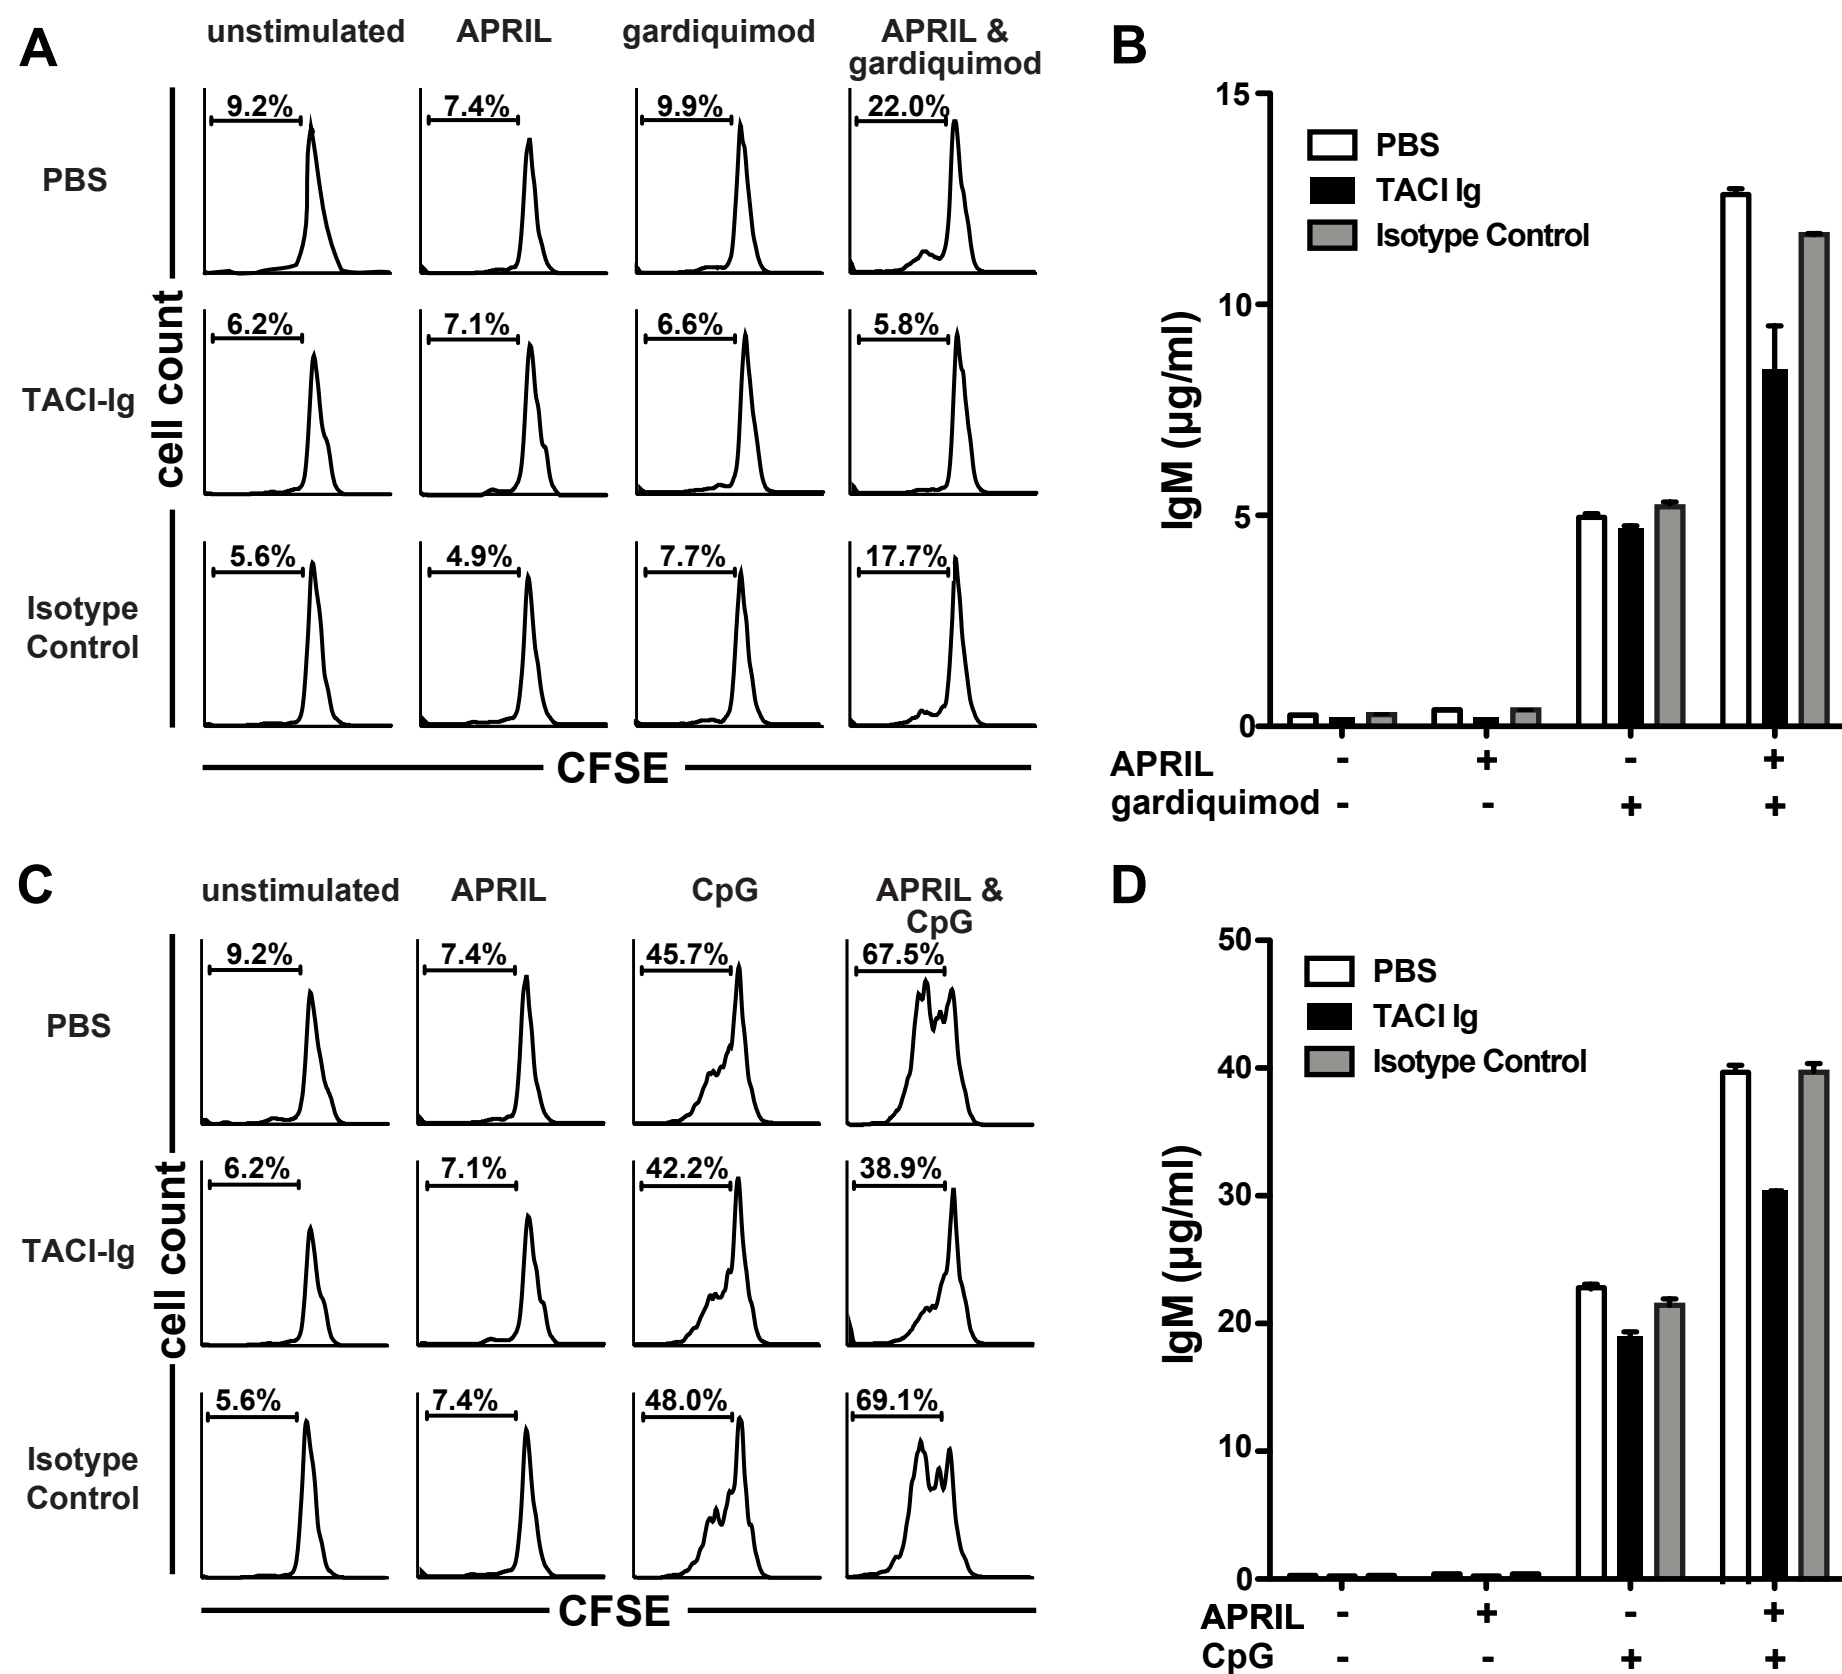

**Supplemental Figure 3.** The TACI ligand APRIL potentiates TLR7 and TLR9 mediated activation of healthy donor splenic B cells. At five days healthy donor splenic B cells undergo more cell divisions (**A** and **C**) and secrete greater quantities of IgM (**B** and **D**) when treated with a TLR7 agonist (gardiquimod) or a TLR9 agonist (CpG) in combination with APRIL. The additional response attributed to APRIL is mitigated by the addition of a soluble decoy TACI receptor (TACI-Ig) which sequesters APRIL and BAFF. B-cell proliferation and IgM secretion experiments performed in duplicate. Error bars represent the mean  $\pm$  SEM.

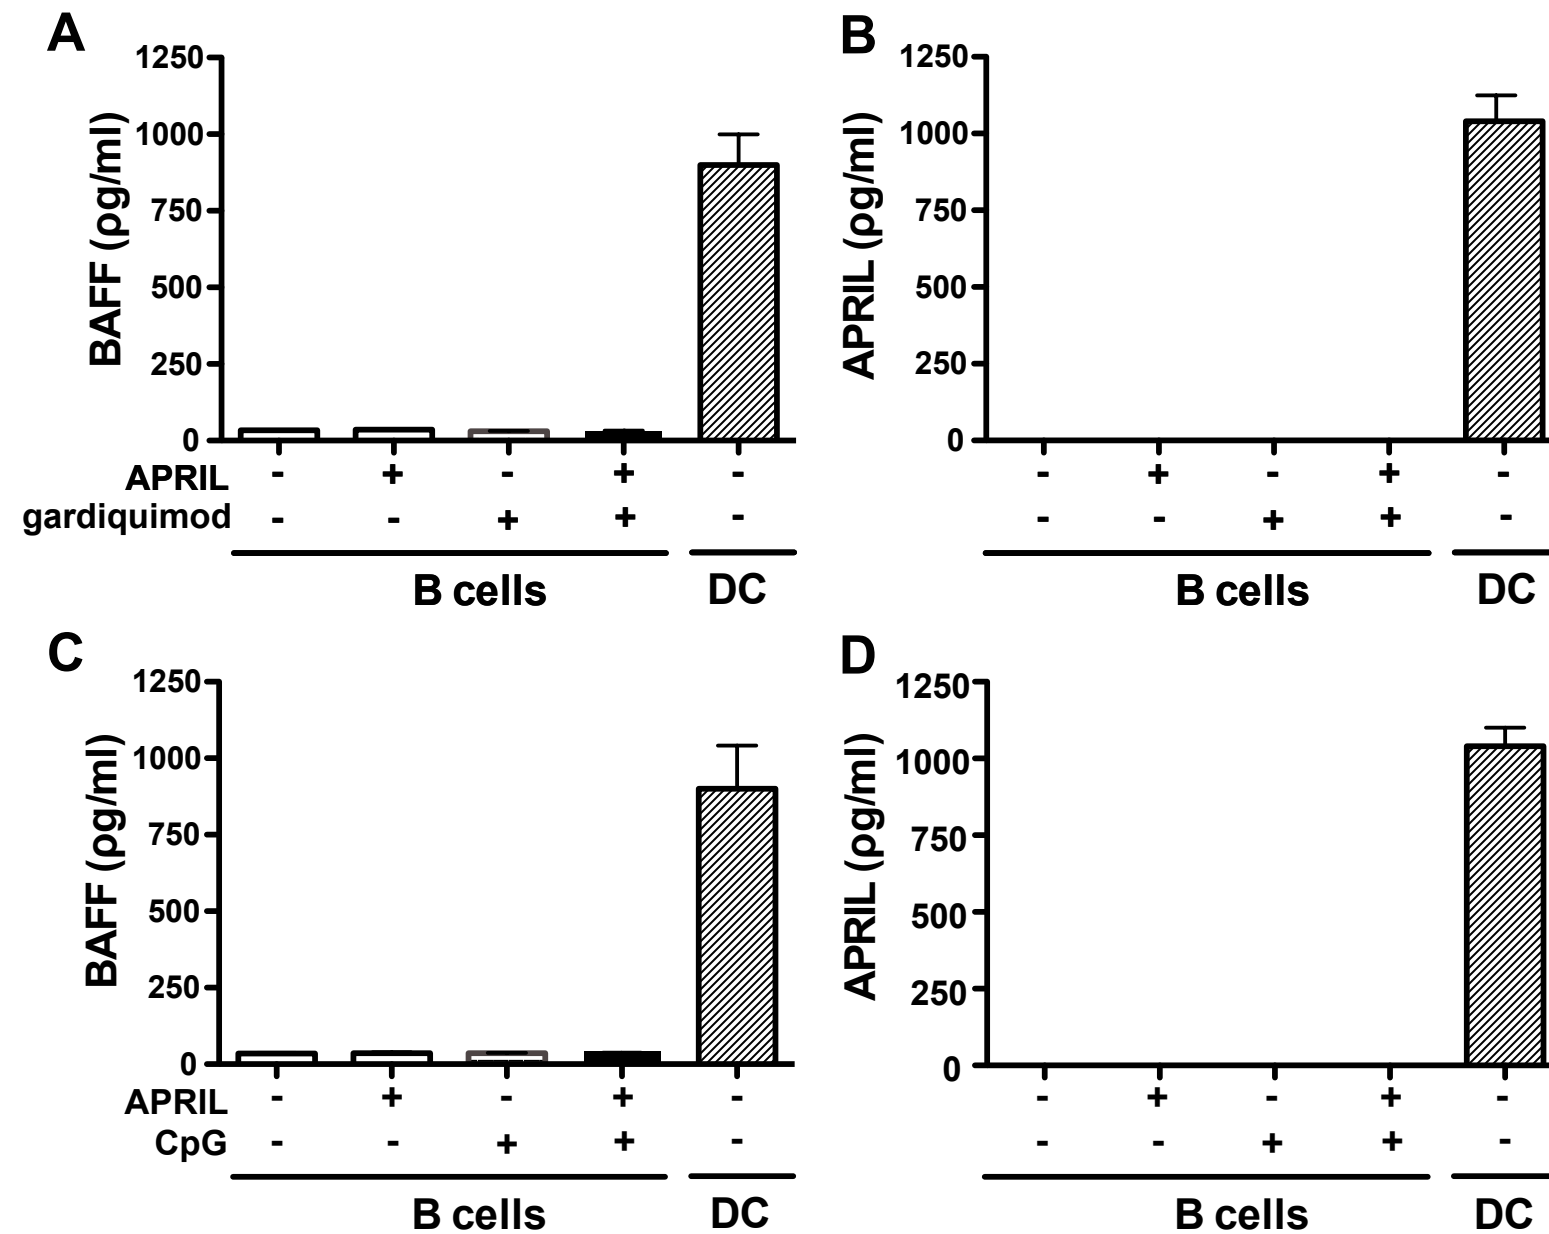

**Supplemental Figure 4.** Limited BAFF and absent APRIL secretion by healthy donor splenic B cells. After two hours healthy donor splenic B cells secrete little soluble BAFF (**A** and **C**) and undetectable soluble APRIL (**B** and **D**) under various activating conditions. Dendritic cells (DC) from healthy donors secrete significant soluble BAFF and APRIL in the same time interval without activation. Experiment performed in duplicate. Error bars represent the mean  $\pm$  SEM.

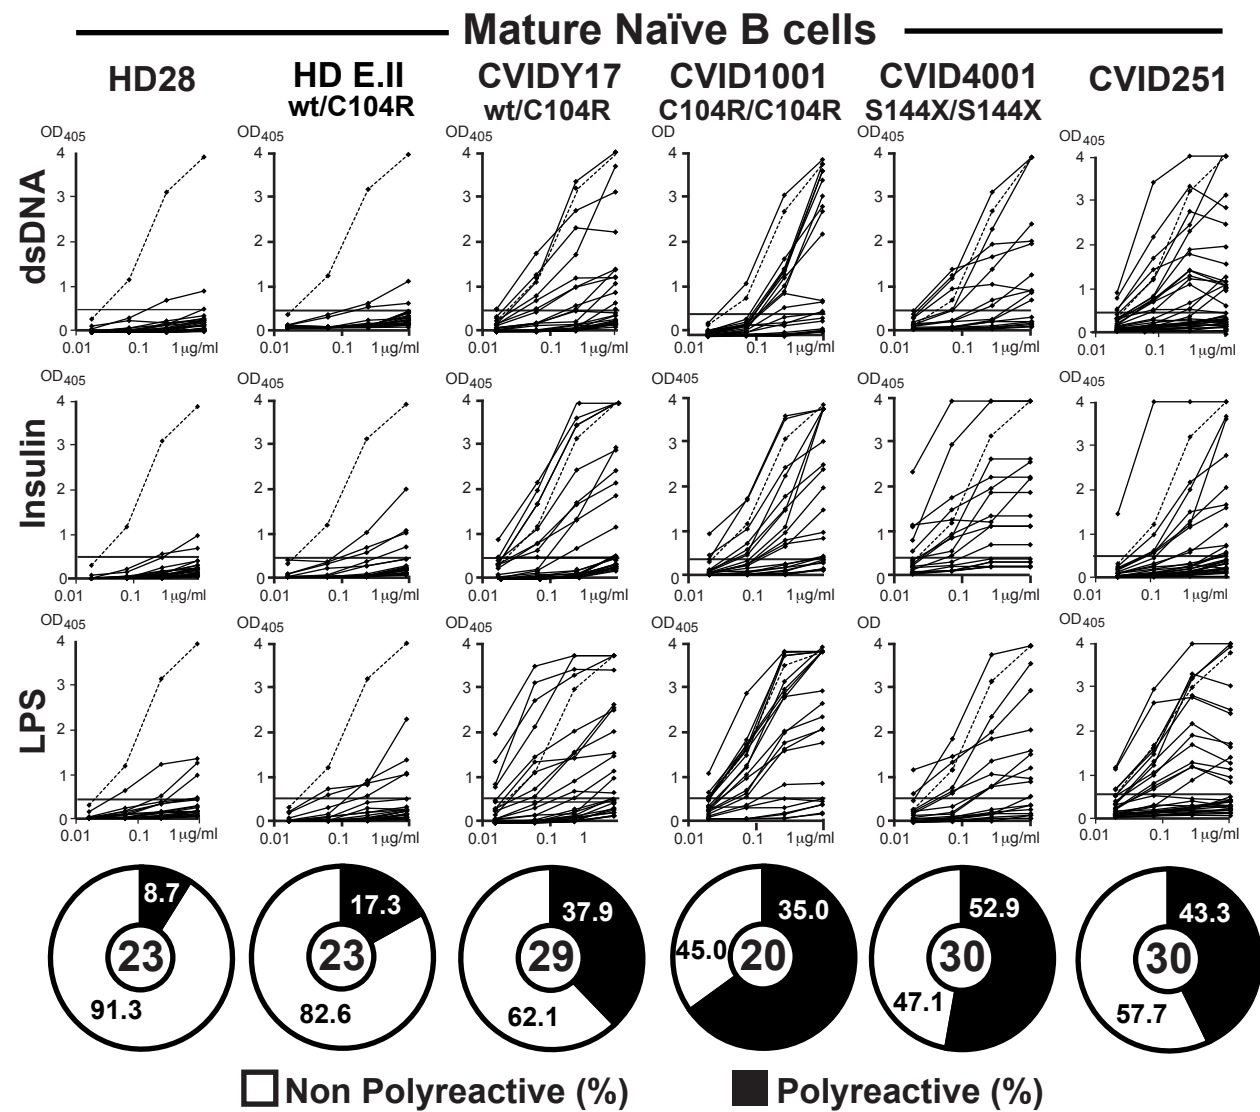

**Supplemental Figure 5.** Persistence of polyreactive mature naïve B cells in the blood of representative CVID patients. Recombinant antibodies derived from mature naïve B cells from representative individuals were tested by ELISA for reactivity against dsDNA, insulin, and lipopolysaccharide (LPS)(20). Antibodies were considered polyreactive when they reacted against all 3 antigens. Dashed lines show ED38-antibody positive control and solid lines show binding for each cloned recombinant antibody. Horizontal lines define cutoff OD405 for positive reactivity. For each individual, the frequency of polyreactive and non-polyreactive clones is summarized in pie pie charts with the total number of antibodies tested indicated in the center.



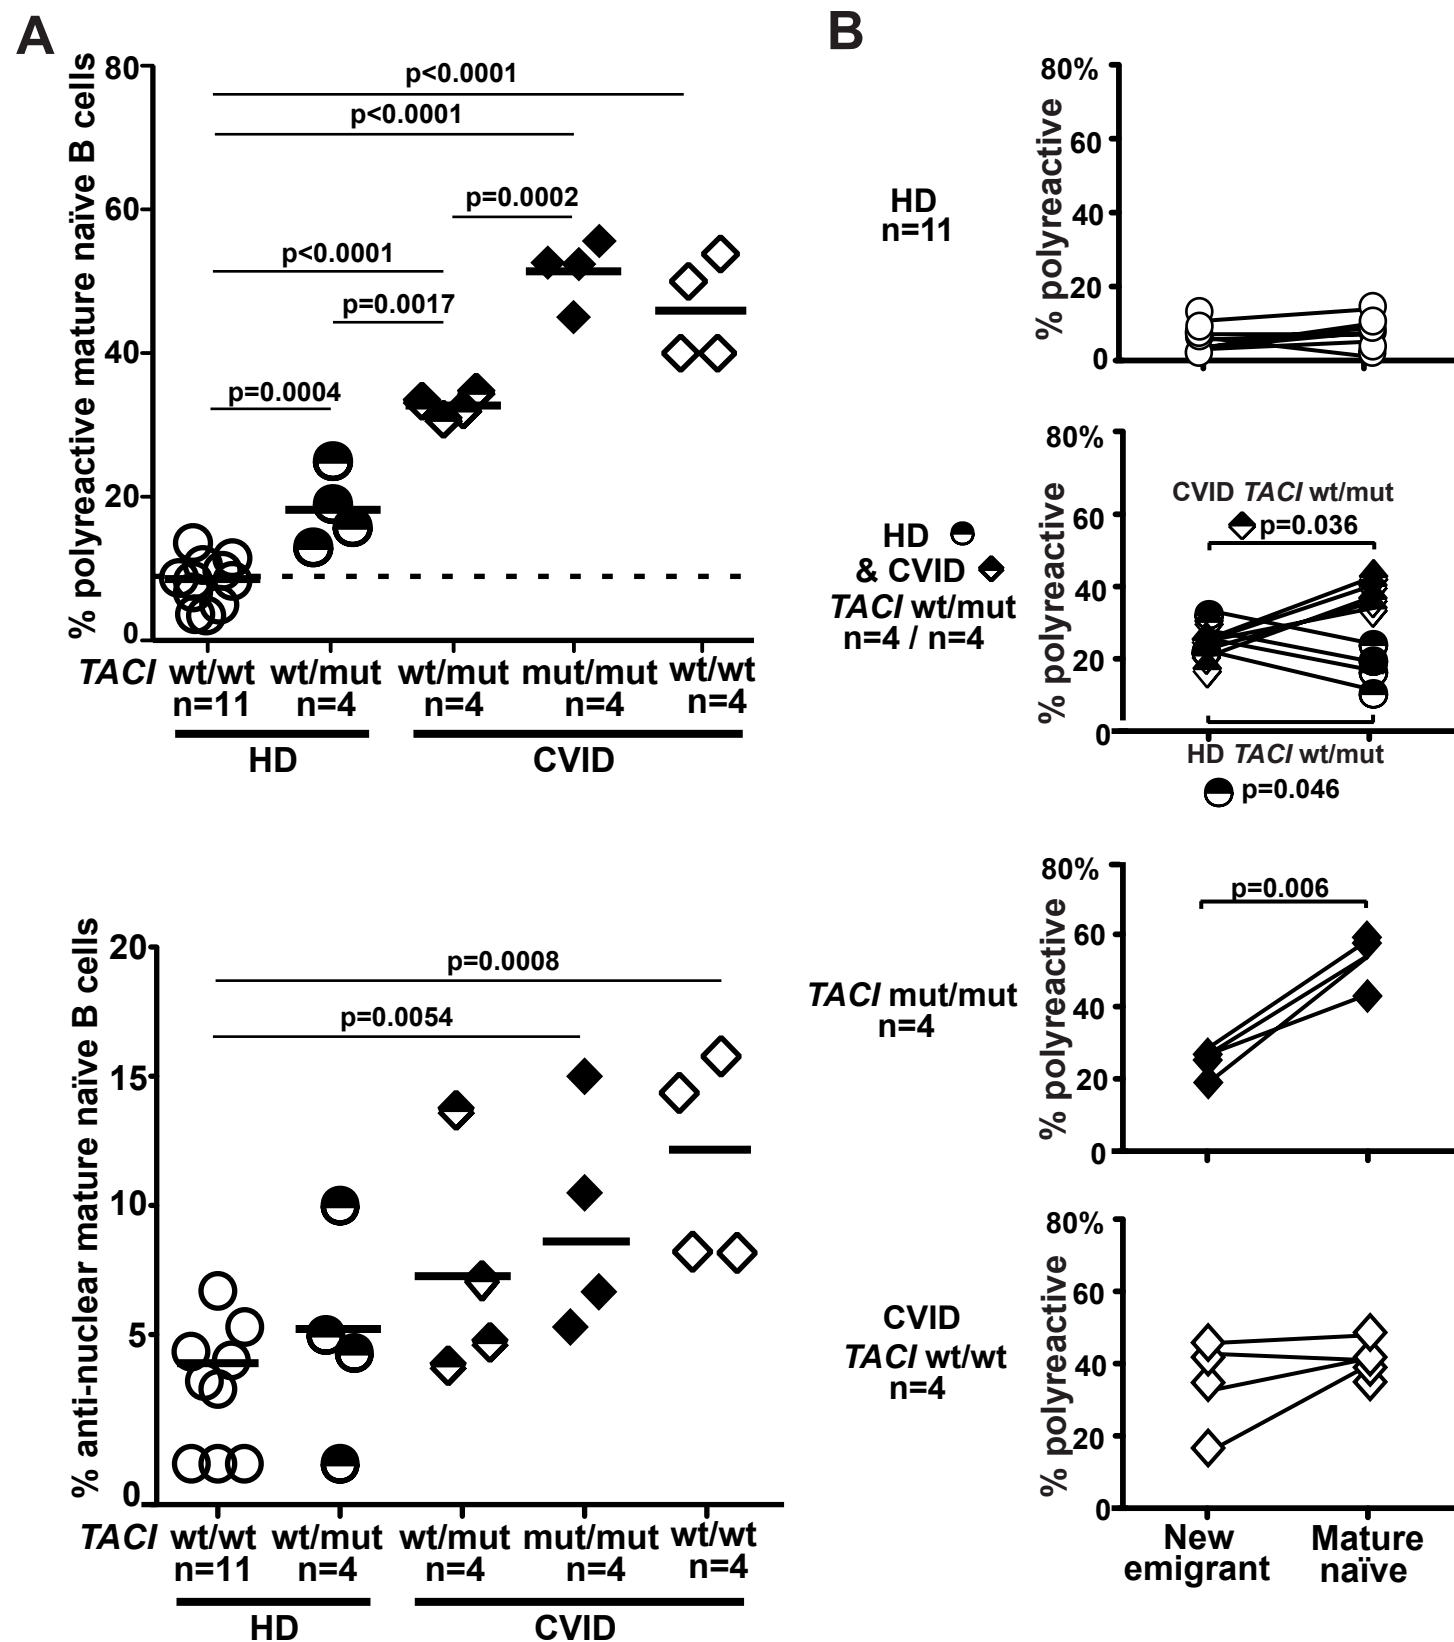

**Supplemental Figure 6.** Persistence of autoreactive clones in the mature naïve B cell pool of CVID patients. **(A)** Recombinant antibodies derived from mature naïve B cells were tested for polyreactivity via ELISA and anti-nuclear reactivity via immunofluorescence. **(B)** The frequency of polyreactive clones increased from the new emigrant/transitional to the mature naïve stage of B-cell development in CVID patients. Statistical significance by unpaired **(A)** and paired **(B)** student t-test is indicated.

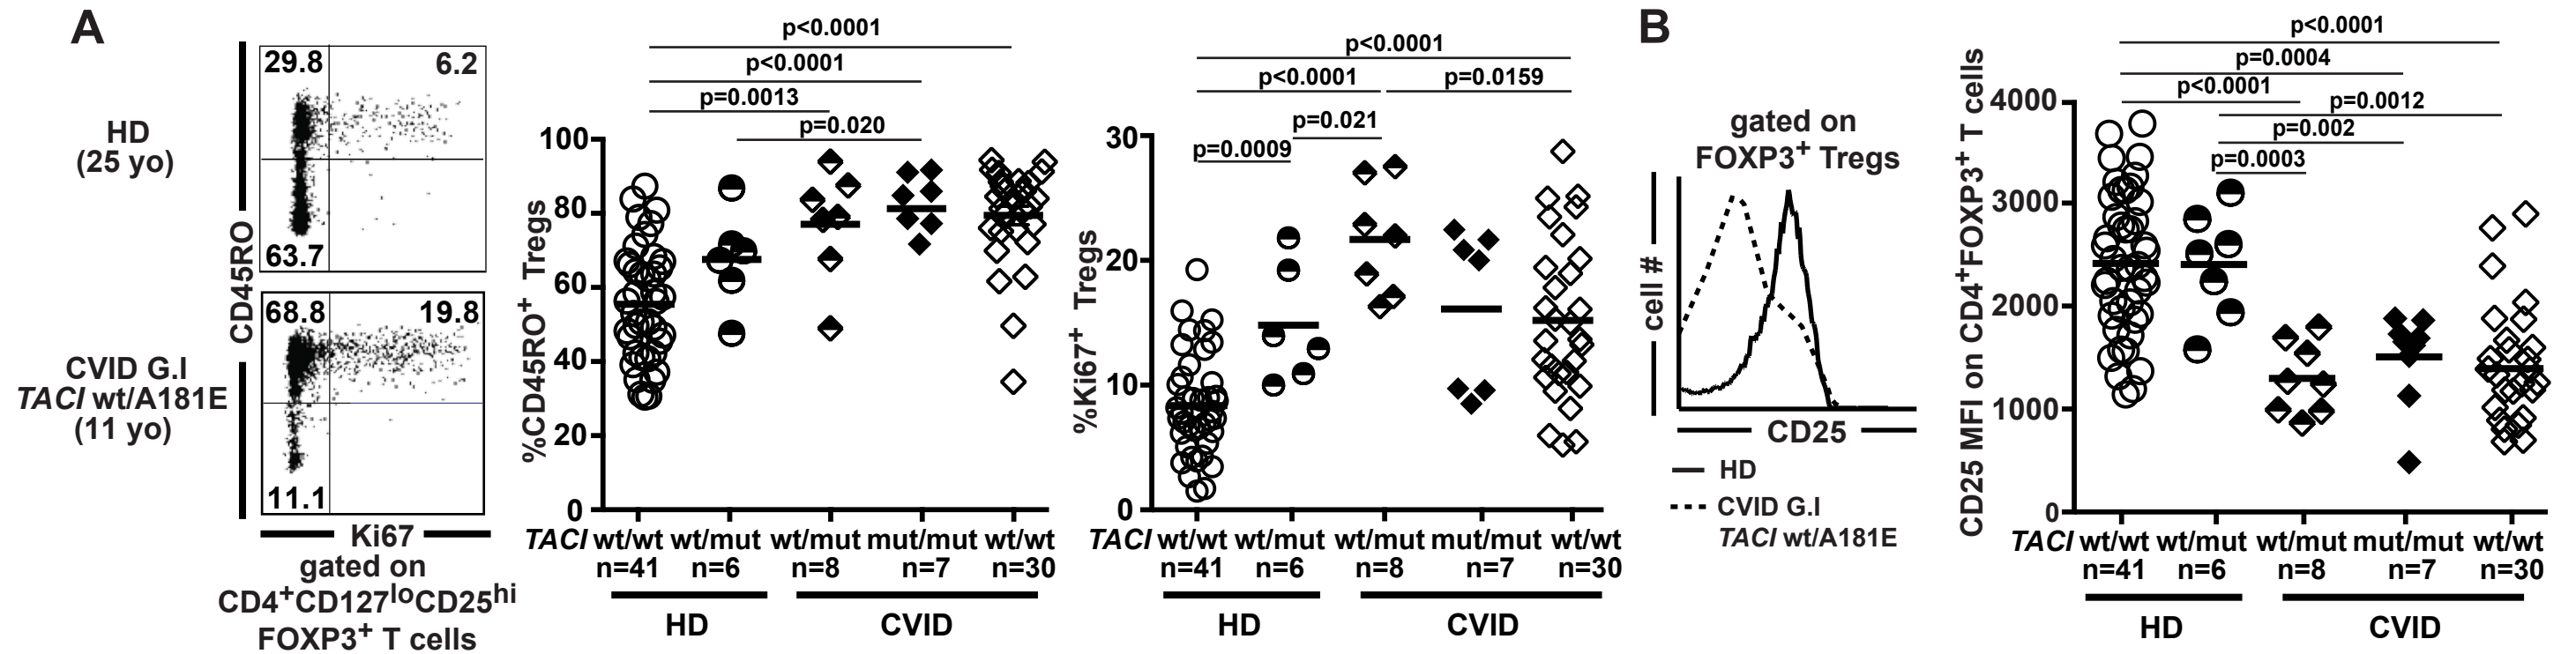

**Supplemental Figure 7.** CVID disease status but not TACI mutation carrier status is associated with an altered Treg phenotype. (A) Dot plots represent an increased frequency of CD4<sup>+</sup>CD25<sup>hi</sup>FOXP3<sup>+</sup> T cells expressing the memory marker CD45RO<sup>+</sup> and the intracellular proliferation marker Ki67<sup>+</sup> in a representative CVID patient with a *TACI* mutation and a comparison healthy donor control. Scatter plots demonstrate that an increased frequency of CD45RO<sup>+</sup>Ki67<sup>+</sup> Tregs are a feature of CVID patients and also healthy carriers of a single *TACI* mutation. (B) Downregulated CD25/IL-2RA cell surface expression on FOXP3<sup>+</sup> T cells in CVID patients (dashed line) versus healthy donors (solid line). Statistical significance by unpaired student t-test is indicated.

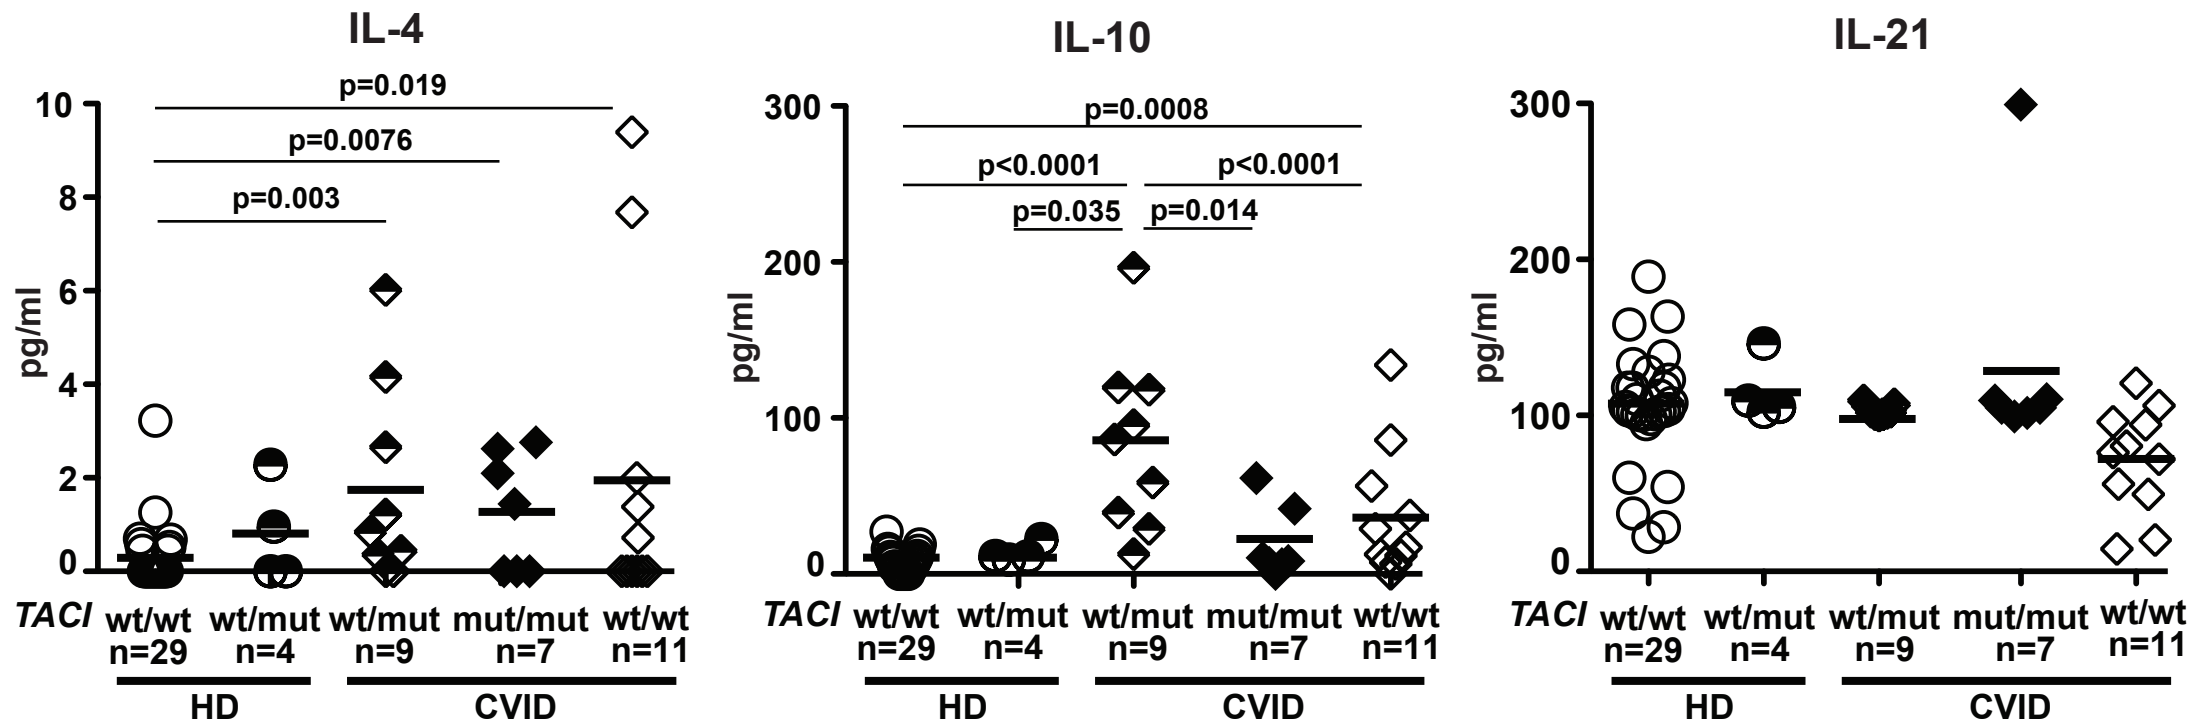

**Supplemental Figure 8.** Predominant Th2 serum cytokines in CVID patients with a single *TAC1* mutation. Statistical significance by unpaired student t-test is indicated.

**Supplemental Table 1.** Characteristics of healthy donors and CVID patients with *TACI* mutations.

| Individual | Age | Sex | <i>TACI</i> mutation(s) | Disease status        | Autoimmune disease       | Splenectomized? | Receiving antibody replacement therapy? |
|------------|-----|-----|-------------------------|-----------------------|--------------------------|-----------------|-----------------------------------------|
| HD G.II    | 38  | F   | A181E                   | Healthy               | -                        | No              | No                                      |
| HD E.V     | 80  | F   | C104R                   | Healthy               | -                        | No              | No                                      |
| HD D.II    | 82  | M   | C104R                   | Healthy               | -                        | No              | No                                      |
| HD E.II    | 79  | M   | C104R                   | Healthy               | -                        | No              | No                                      |
| HD D.III   | 14  | M   | C104R                   | Healthy               | -                        | No              | No                                      |
| M.I.1      | 78  | M   | C104R                   | Healthy               | -                        | No              | No                                      |
| M.I.2      | 78  | F   | C104R                   | Healthy               | -                        | No              | No                                      |
| CVID321    | 27  | F   | A181E                   | CVID                  | ITP, arthritis, uvetitis | Yes             | Yes                                     |
| CVIDY15    | 40  | M   | C104R                   | CVID                  | -                        | No              | Yes                                     |
| CVIDY17    | 48  | F   | C104R                   | CVID                  | Autoimmune liver disease | No              | Yes                                     |
| CVID B.I   | 19  | F   | A181E                   | CVID                  | -                        | No              | Yes                                     |
| CVID292    | 45  | F   | C104R                   | CVID                  | ITP                      | Yes             | Yes                                     |
| CVID G.I   | 11  | F   | A181E                   | CVID                  | ITP, AIHA                | No              | Yes                                     |
| CVID376    | 45  | M   | C104R                   | CVID                  | ITP                      | No              | Yes                                     |
| C12A       | 12  | M   | C104R                   | CVID                  | -                        | No              | Yes                                     |
| M.II.1     | 30  | F   | C104R/C104R             | CVID                  | -                        | No              | Yes                                     |
| M.II.2     | 32  | F   | C104R/C104R             | CVID                  | -                        | No              | Yes                                     |
| A.II.1     | 75  | M   | S144X/S144X             | Hypogammaglobulinemia | -                        | Yes             | No                                      |
| CVID1001   | 26  | F   | C104R/C104R             | CVID                  | -                        | No              | Yes                                     |
| CVID1073   | 52  | F   | C104R/571insG           | CVID                  | -                        | No              | Yes                                     |
| C12        | 41  | F   | C104R/204insA           | CVID                  | -                        | No              | Yes                                     |
| CVID218    | 58  | F   | C104R/S194X             | CVID                  | ITP, AIHA,               | Yes             | Yes                                     |

Healthy donors without *TACI* mutations #1-50: age range 11-61yrs (mean 39.3yrs); 45% male, 55% female.

CVID patients without *TACI* mutations #1-50: age range 7-74yrs (mean 43.1yrs); 36% male,64% female

*AIHA*, Autoimmune hemolytic anemia; *F*, female; *ITP*, idiopathic thrombocytopenia; *M*, male;

**Supplemental Table 2.** Repertoire and reactivity of antibodies from new emigrant B cells of healthy donor 29

| Ig          | HEAVY |      |    |    |                              | LIGHT  |       |    |              |        | REACTIVITY |       |          |
|-------------|-------|------|----|----|------------------------------|--------|-------|----|--------------|--------|------------|-------|----------|
|             | VH    | D    | RF | JH | CDR3 (aa)                    | Length | Vκ    | Jκ | CDR3 (aa)    | Length | Poly       | HEp-2 | Staining |
| neHD29 03   | 3-30  | 3-10 | 3  | 4  | GPGGVRGVITYFDY               | 13     | 1-39  | 4  | QQSYSTLLT    | 9      | -          | -     | -        |
| neHD29 04   | 4-31  | 3-22 | 2  | 4  | DGSRLDSSGYYFYDY              | 16     | 3-15  | 5  | QQYNNWPLIT   | 10     | -          | -     | c        |
| neHD29 14   | 3-23  | 3-10 | 2  | 3  | GHYYSGSGYYNGVAFDI            | 17     | 1-39  | 2  | QQSYSTPYT    | 9      | -          | -     | -        |
| neHD29 16   | 3-23  | 5-5  | 2  | 6  | GGYSYGVGYGMDV                | 14     | 1-39  | 5  | QQSYSTPIT    | 11     | -          | -     | c        |
| neHD29 23   | 1-18  | 2-2  | 2  | 3  | GRGYCSSTSCYLRS DGMDV         | 20     | 1-12  | 3  | QQANSFPLT    | 9      | -          | +     | -        |
| neHD29 24   | 4-34  | 1-26 | 3  | 5  | APLEV GATRWFDP               | 13     | 1-39  | 4  | QQSYSTPLT    | 9      | -          | -     | -        |
| neHD29 25   | 4-34  | 6-13 | 3  | 4  | IAGAGGGGY                    | 9      | 2D-29 | 4  | MQSIQLPLT    | 10     | -          | -     | -        |
| neHD29 28 # | 1-3   | 2-2  | 2  | 3  | AWAGYCSSTSCNYAFDI            | 17     | 4-1   | 3  | QQYYSTPLS    | 9      |            |       |          |
| neHD29 30   | 3-9   | 3-10 | 2  | 4  | DITRYYGSGRSLGD               | 14     | 1-39  | 1  | QQSYSTLWT    | 10     | -          | -     | -        |
| neHD29 31 # | 4-31  | 4-23 | 2  | 5  | ELYGGPIDP                    | 9      | 3-15  | 4  | QQYNNWPLT    | 10     |            |       |          |
| neHD29 33   | 3-9   | 3-22 | 2  | 3  | DQDDSSGSPHAFDI               | 14     | 1-NL1 | 2  | QQYYSTPLYT   | 10     | -          | -     | -        |
| neHD29 34   | 1-3   | 2-8  | 2  | 6  | DRDYCTNGVCYLNYYYGMDV         | 20     | 2-28  | 1  | MQALQTPRT    | 10     | -          | -     | -        |
| neHD29 37   | 1-69  | 5-12 | 2  | 3  | WSPSGYDGGDV                  | 11     | 4-1   | 2  | QQYYSTLLY    | 11     | -          | +     | -        |
| neHD29 44   | 4-34  | 2-15 | 3  | 5  | ASIVVVAARDNRFDP              | 16     | 1-39  | 5  | QQSYSTPIT    | 9      | -          | -     | -        |
| neHD29 46   | 3-66  | 5-5  | 2  | 6  | DAAKRGSYSSSSYYYGMDV          | 20     | 3-15  | 1  | QQYNNWPPWT   | 11     | -          | -     | -        |
| neHD29 48 # | 3-21  | /    | /  | 6  | VFYGM DV                     | 7      | 1-27  | 1  | QKYSAPQT     | 10     |            |       |          |
|             | VH    | D    | RF | JH | CDR3 (aa)                    | Length | Vλ    | Jλ | CDR3 (aa)    | Length | Poly       | HEp-2 | Staining |
| neHD29 01   | 1-8   | 6-13 | 2  | 6  | IGRSGYSSSWYRTGHLARGAPYYYGMDV | 29     | 2-14  | 3  | SSYTSSSTLV   | 10     | +          | +     | -        |
| neHD29 09   | 4-b   | 4-17 | 3  | 4  | GVTTPFYFYDY                  | 11     | 1-44  | 1  | AAWDDSLNGHYV | 12     | -          | -     | -        |
| neHD29 12   | 1-69  | 3-9  | 3  | 6  | GGVTIFSYGMDV                 | 12     | 3-21  | 2  | QVWDSSTDHGV  | 11     | -          | -     | -        |
| neHD29 13 # | 4-59  | 1-7  | 2  | 5  | ARGGDNWNYYGGNWFDP            | 16     | 3-21  | 2  | QVWDSSTDHV   | 11     |            |       |          |
| neHD29 19   | 4-4   | 3-22 | 2  | 4  | ALYYDSSGSPWTRSFDP            | 18     | 1-44  | 2  | AAWDDSLNGVV  | 12     | -          | -     | -        |
| neHD29 20   | 5-51  | 6-6  | 2  | 5  | RQSSSPLNNWFDP                | 14     | 1-51  | 3  | GTWDSSTLYWV  | 11     | -          | +     | -        |
| neHD29 22   | 1-69  | 6-19 | 2  | 6  | DCSGWYSPPLTCYYYGMDV          | 20     | 2-11  | 2  | CSYAGSPVW    | 12     | +          | +     | -        |
| neHD29 27 # | 4-59  | 5-24 | 3  | 3  | RGAVEMATIANDAFDI             | 16     | 3-1   | 2  | QAWDSSTVW    | 10     |            |       |          |
| neHD29 29   | 3-21  | 2-2  | 3  | 6  | WGVVPAIPLYYYGMDV             | 17     | 2-8   | 2  | SSYAGSNLV    | 11     | -          | -     | -        |
| neHD29 42   | 3-21  | 2-21 | 2  | 3  | DPPGRSDVCGGDCYSMNAFDI        | 21     | 1-51  | 3  | GTWDSLSAGV   | 11     | -          | +     | -        |
| neHD29 43   | 1-24  | 3-22 | 3  | 3  | VVTRAMIVAGFLGI               | 14     | 3-1   | 1  | QAWDSSTPYV   | 10     | -          | +     | -        |
| neHD29 45 # | 5-51  | /    | /  | 5  | VNYVASSRFDP                  | 11     | 1-44  | 3  | AAWDDSLNGL   | 11     |            |       |          |
| neHD29 48 # |       |      |    |    | see kappa                    |        | 6-57  | 7  | QSYDSSNHV    | 9      |            |       |          |
|             | VH    | D    | RF | JH | CDR3 (aa)                    | Length | V     | J  | CDR3 (aa)    | Length | Poly       | HEp-2 | Staining |
| neHD29 26   | 7-4-1 | 6-13 | 2  | 4  | APDPSSWYPLSPDY               | 14     |       |    |              |        |            |       |          |

RF, reading frame; #, antibody failed to be expressed

-, non-reactive; +, reactive; +2, highly reactive

c, diffuse cytoplasmic staining; A, actin staining; G, Golgi staining; M, mitochondria staining; N, nuclear staining

**Supplemental Table 3.** Repertoire and reactivity of antibodies from new emigrant B cells of healthy donor G.II.

| Ig            | HEAVY |      |    |    |                            | LIGHT  |                |                |             |        | REACTIVITY |       |          |
|---------------|-------|------|----|----|----------------------------|--------|----------------|----------------|-------------|--------|------------|-------|----------|
|               | VH    | D    | RF | JH | CDR3 (aa)                  | Length | V <sub>k</sub> | J <sub>k</sub> | CDR3 (aa)   | Length | Poly       | HEp-2 | Staining |
| neHDG.II 01   | 1-2   | 2    | 3  | 6  | VDIVVNGMDV                 | 11     | 4              | 1              | QQYYSWSWT   | 9      | -          | +     | -        |
| neHDG.II 02   | 3-30  | 2-2  | 2  | 6  | AIPAYCSSTSCYAKPSDYGGYGGMDV | 25     | 2-28           | 2              | MQALQTGYS   | 9      | +2         | -     | c        |
| neHDG.II 03   | 1-69  | 6-6  | 3  | 4  | SGIAARREQYFDY              | 14     | 1-33           | 4              | QQYDNLPT    | 9      | -          | -     | -        |
| neHDG.II 05   | 1-69  | 6-19 | 3  | 6  | DLKGNRIAAENYYGGMDV         | 19     | 1-8            | 2              | QQYYSYPYS   | 9      | -          | +     | -        |
| neHDG.II 06   | 3-30  | 4-4  | 2  | 4  | DNSRIDYSNYGRYFDY           | 16     | 3-15           | 1              | QQYNNWPRT   | 9      | -          | +     | A        |
| neHDG.II 08 # | 1-69  | 3-10 | 3  | 4  | GYLRGGEPARFDY              | 13     | 3-20           | 2              | QQYGSSTLYT  | 9      |            |       |          |
| neHDG.II 11 # | 1-18  | 3-10 | 1  | 4  | GPRLWFGELLSNDY             | 15     | 4-1            | 3              | QQYYSPTVT   | 9      |            |       |          |
| neHDG.II 12   | 3-49  | 3-9  | 2  | 6  | GGDILTYGYPDYGGYGGMDV       | 20     | 2-30           | 3              | MQGTHWPPLT  | 10     | -          | -     | -        |
| neHDG.II 13   | 3-66  | 1-26 | 2  | 6  | DSSGTTVPVGGYGGMDV          | 17     | 1-8            | 4              | QQYYSYPRY   | 9      | -          | -     | -        |
| neHDG.II 16   | 3-23  | 3-16 | 3  | 4  | SRVSRHITFGGVIKVDVTDY       | 21     | 3-15           | 2              | QQYNNWPRT   | 10     | +2         | -     | N        |
| neHDG.II 29   | 5-51  | 4-23 | 2  | 6  | LSHTIPDYGGMDV              | 13     | 3-11           | 1              | QQRSNWPPT   | 9      | +          | +     | c        |
| neHDG.II 31   | 3-30  | 3-3  | 2  | 4  | DTYYDFWSGFPMY              | 14     | 3-15           | 1              | QQYNNWPRT   | 9      | -          | -     | -        |
| neHDG.II 34   | 3-33  | 4-17 | 2  | 6  | DRNDYDHYGGYGGMDV           | 17     | 1-39           | 2              | QQSYSTPPYT  | 10     | -          | -     | -        |
| neHDG.II 36   | 3-15  | /    | /  | 3  | TTPPNAFDI                  | 9      | 1-39           | 2              | QQSYSTPYT   | 9      | -          | +     | -        |
| neHDG.II 38 # | 5-51  | 3-10 | 3  | 5  | QLGGMVRGVIRWFDY            | 15     | 1-39           | 3              | QQSYSTPLFT  | 10     |            |       |          |
| neHDG.II 39   | 1-2   | 3-3  | 2  | 4  | EIIVVPNNYDFWSGYTRGFY       | 22     | 1-39           | 5              | QQSYSTLGIT  | 10     | -          | +     | -        |
| neHDG.II 40 # | 1-8   | 2-2  | 2  | 6  | GAKKYCSSTSCYTAPNYYGGMDV    | 24     | 1-5            | 2              | QQYNSYSYS   | 9      |            |       |          |
| neHDG.II 43   | 1-69  | 3-22 | 3  | 5  | ANGAITMKVWVWFDY            | 14     | 3-11           | 4              | QQRSNWLT    | 8      | +          | +     | c        |
| neHDG.II 27   |       |      |    |    |                            |        | 1-39           | 1              | QQSYSTPYT   | 9      |            |       |          |
|               | VH    | D    | RF | JH | CDR3 (aa)                  | Length | V <sub>I</sub> | J <sub>I</sub> | CDR3 (aa)   | Length | Poly       | HEp-2 | Staining |
| neHDG.II 03 # | 1-69  | 6-6  | 3  | 4  | SGIAARREQYFDY              | 14     | 2-23           | 3              | CSYAGSSTWV  | 10     |            |       |          |
| neHDG.II 09   | 4-39  | 2-2  | 2  | 3  | FAYCSSTSCYQTDAFDI          | 17     | 3-1            | 3              | QAWDSSTARV  | 11     | -          | -     | -        |
| neHDG.II 10   | 1-46  | 6-19 | 3  | 6  | DRNSIAVPTGYYGGMDV          | 19     | 2-8            | 3              | SSYAGSNPHV  | 12     | -          | -     | -        |
| neHDG.II 15   | 3-30  | 2-2  | 1  | 6  | DRGYQLLGASGMDV             | 14     | 2-14           | 3              | SSYSSSTV    | 10     | -          | -     | -        |
| neHDG.II 17 # | 3-48  | 6-13 | 1  | 4  | LQQLVDY                    | 7      | 3-27           | 3              | YSAADNNQV   | 10     |            |       |          |
| neHDG.II 19   | 3-43  | 2-8  | 2  | 6  | DIANGVYYGGMDV              | 14     | 2-14           | 1              | SSYSSSTLGV  | 11     | -          | +     | -        |
| neHDG.II 20   | 4-39  | /    | /  | 3  | HERAWILKGAFDI              | 13     | 1-47           | 3              | AAWDDSLSGPV | 11     | -          | -     | -        |
| neHDG.II 27   | 3-21  | 3-10 | 1  | 3  | ARRFSRDREFGELLYDAFDI       | 21     | 1-40           | 3              | QSYDSSLGHV  | 12     | +2         | +     | A        |
| neHDG.II 28   | 1-69  | 5-24 | 3  | 2  | EGFEMAPNWFYDL              | 13     | 2-14           | 3              | SSYSSSTLV   | 10     | -          | -     | -        |
| neHDG.II 35   | 3-15  | 4-17 | 3  | 6  | RPLNTVTTLG                 | 10     | 1-44           | 3              | AAWDDSLNGRV | 11     | +          | +     | -        |
| neHDG.II 42   | 3-15  | 1-26 | 1  | 6  | DLPDSKWEELGYYGGMDV         | 19     | 1-47           | 1              | AAWDDSLSGYV | 11     | -          | -     | -        |
| neHDG.II 03   |       |      |    |    |                            |        | 2-23           | 3              | CSYAGSSTWV  | 10     |            |       |          |
| neHDG.II 27   |       |      |    |    |                            |        | 1-40           | 3              | QSYDSSLGHV  | 12     |            |       |          |
| neHDG.II 36   |       |      |    |    |                            |        | 3-10           | 3              | QAWDSSTAV   | 9      |            |       |          |
|               | VH    | D    | RF | JH | CDR3 (aa)                  | Length | V              | J              | CDR3 (aa)   | Length | Poly       | HEp-2 | Staining |
| neHDG.II 25   | 4-34  | 3-10 | 1  | 5  | VKRLWFGEGNWFYDL            | 15     |                |                |             |        |            |       |          |

RF, reading frame; #, antibody failed to be expressed

-, non-reactive; +, reactive; +2, highly reactive

c, diffuse cytoplasmic staining; A, actin staining; G, Golgi staining; M, mitochondria staining; N, nuclear staining

**Supplemental Table 4.** Repertoire and reactivity of antibodies from new emigrant B cells of healthy donor E.V.

| Ig           | HEAVY |      |    |    |                       |        | LIGHT |    |             |        | REACTIVITY |       |          |
|--------------|-------|------|----|----|-----------------------|--------|-------|----|-------------|--------|------------|-------|----------|
|              | VH    | D    | RF | JH | CDR3 (aa)             | Length | Vk    | Jk | CDR3 (aa)   | Length | Poly       | HEp-2 | Staining |
| neHDE.V 06   | 3-7   | 6-13 | 3  | 6  | AIGAAVLRGALYYYGMDV    | 19     | 2-28  | 5  | MQALQTITFD  | 10     | -          | -     | -        |
| neHDE.V 08   | 3-30  | /    | /  | 6  | GPIPARGYYYGMDV        | 14     | 1-39  | 1  | QQSYSTLWT   | 9      | -          | -     | -        |
| neHDE.V 11   | 3-30  | 3-22 | 3  | 5  | DSGVVVITNFRFDP        | 14     | 1-39  | 4  | QQSYSTRLT   | 10     | -          | -     | -        |
| neHDE.V 15   | 1-3   | 6-19 | 2  | 3  | VPYSSGWKGAFDI         | 13     | 1-39  | 2  | QQSYSTPYT   | 9      | -          | -     | -        |
| neHDE.V 18   | 1-18  | 1-26 | 2  | 4  | NSGSFRGSYFPGNYFDY     | 17     | 3-20  | 4  | QQYGSSPLT   | 9      | +          | -     | -        |
| neHDE.V 19   | 3-9   | 1-26 | 3  | 4  | SLGATTGSVFDY          | 12     | 3-20  | 4  | QQYGTSLT    | 9      | -          | -     | -        |
| neHDE.V 23   | 4-4   | 3-3  | 2  | 4  | GEYYDFWSGPQNFYD       | 15     | 3-20  | 5  | QQYDNLITFD  | 11     | -          | +     | -        |
| neHDE.V 24   | 4-59  | 3-22 | 2  | 3  | ESHGHQHYDSSGRKSHAFDI  | 22     | 1-39  | 3  | QQSYSTPFT   | 9      | +          | +     | -        |
| neHDE.V 25 # | 3-30  | 3-10 | 2  | 3  | DSGPKNTAYGSGSYRAFDI   | 20     | 1-39  | 1  | QQSYSTPWT   | 9      | -          | -     | -        |
| neHDE.V 27   | 5-a   | 6-13 | 2  | 6  | LSSSWYAAPNYYYGMDV     | 18     | 2-28  | 1  | MQAWGG      | 6      | -          | -     | -        |
| neHDE.V 29   | 4-4   | 3-22 | 2  | 5  | HSSGYLGFWD            | 12     | 1-6   | 4  | LQDYNPLT    | 9      | -          | -     | -        |
| neHDE.V 30   | 4-34  | 4-4  | 3  | 6  | GTTVVYYYMDV           | 14     | 1-39  | 1  | QQSYSTPRT   | 9      | -          | -     | -        |
| neHDE.V 31   | 1-24  | 3-16 | 2  | 4  | DGARYDYVWGY           | 11     | 1-39  | 2  | QQSYSTPRT   | 9      | -          | +     | c        |
| neHDE.V 32   | 1-46  | 2-2  | 3  | 6  | DLGIVVPAIYGMDV        | 16     | 3-20  | 4  | QQYGSSPGLT  | 10     | -          | -     | -        |
| neHDE.V 36 # | 4-39  | 4-17 | 3  | 6  | PTVTITGAYYGMVDV       | 15     | 3-11  | 1  | QQRSNWPLT   | 9      | -          | -     | -        |
| neHDE.V 39   | 3-48  | 1-26 | 2  | 4  | DADGSYFGWYFDY         | 14     | 3-15  | 4  | QQYNNWPLT   | 10     | -          | -     | -        |
| neHDE.V 41   | 3-7   | 6-6  | 2  | 2  | SYSSAWYFDL            | 11     | 4-1   | 1  | QQYYSTPT    | 8      | -          | +     | c        |
| neHDE.V 42   | 3-30  | 3-3  | 3  | 6  | APNTIFGYYYMDV         | 14     | 2-28  | 1  | MQPLQTPLA   | 9      | -          | -     | -        |
| neHDE.V 46   | 4-34  | 2-2  | 3  | 4  | APYRVVRSYDILTGQAGYFDY | 23     | 4-1   | 1  | QQYYSTPQT   | 9      | +          | +     | c        |
| neHDE.V 21   |       |      |    |    |                       |        | 2-14  | 1  | SSYSSSTRYV  | 11     |            |       |          |
|              | VH    | D    | RF | JH | CDR3 (aa)             | Length | Vλ    | Jλ | CDR3 (aa)   | Length | Poly       | HEp-2 | Staining |
| neHDE.V 10   | 3-30  | 6-25 | 2  | 6  | KESGYYYGMDV           | 11     | 3-21  | 3  | QVWSSSDHWV  | 11     | -          | +     | -        |
| neHDE.V 17   | 3-20  | 3-16 | 2  | 4  | VHDYVWGSYRYDY         | 13     | 8-61  | 3  | VLYMGSGFVW  | 10     | -          | +     | -        |
| neHDE.V 21   | 3-30  | 3-22 | 2  | 5  | GLSYLYYDSSGYWFD       | 17     | 2-14  | 1  | SSYSSSTRYV  | 11     | +          | +     | -        |
| neHDE.V 22   | 1-2   | 1-26 | 3  | 3  | VGATSRSSFIAFDI        | 15     | 2-14  | 2  | SSYSSSTLV   | 10     | -          | +     | N        |
| neHDE.V 26   | 1-46  | 2-15 | 3  | 6  | ARVVAATPQLNSMDV       | 16     | 1-36  | 2  | AAWDDSLNGVW | 11     | -          | -     | -        |
| neHDE.V 28   | 3-23  | 5-5  | 2  | 3  | GSYSGKGNDAFDI         | 13     | 3-21  | 3  | QVWSSSDHRV  | 11     | +          | +     | c        |
| neHDE.V 35   | 4-30  | 6-13 | 1  | 4  | FVVGQLALRIYFDY        | 15     | 2-11  | 2  | CSYAGSYIVV  | 10     | -          | -     | -        |
| neHDE.V 38 # | 3-49  | 3-22 | 2  | 4  | TRDKGSGSDY            | 10     | 3-21  | 2  | QVWSSSDHVW  | 11     |            |       |          |
| neHDE.V 40   | 3-30  | 3-10 | 1  | 4  | DGGDARFGEYVWSPY       | 15     | 1-40  | 3  | QSYDSSLVHWV | 12     | -          | -     | -        |
| neHDE.V 45   | 3-48  | 6-19 | 1  | 6  | GWATARNGLVMDV         | 14     | 1-47  | 3  | AAWDDSLSGVW | 11     | +          | -     | -        |
| neHDE.V 47 # | 4-34  | /    | /  | 4  | GPEYLLPPSRGY          | 12     | 1-47  | 3  | AAWDDSLSGVW | 11     |            |       |          |
| neHDE.V 48   | 3-30  | 3-22 | 2  | 5  | GLSYLYYDSSGYWFD       | 17     | 2-11  | 3  | CSYGSYTWV   | 9      | +          | +     | -        |
|              | VH    | D    | RF | JH | CDR3 (aa)             | Length | V     | J  | CDR3 (aa)   | Length | Poly       | HEp-2 | Staining |
| neHDE.V 20   | 4-34  | 6-6  | 2  | 4  | MYSSSYADY             | 10     |       |    |             |        |            |       |          |
| neHDE.V 48   | 3-30  | 3-22 | 2  | 5  | GLSYLYYDSSGYWFD       | 17     |       |    |             |        |            |       |          |

RF, reading frame; #, antibody failed to be expressed

-, non-reactive; +, reactive; +2, highly reactive

c, diffuse cytoplasmic staining; A, actin staining; G, Golgi staining; M, mitochondria staining; N, nuclear staining

**Supplemental Table 5.** Repertoire and reactivity of antibodies from new emigrant B cells of healthy donor E.II.

| Ig            | HEAVY |      |    |    |                       | LIGHT  |      |    |              | REACTIVITY |      |       |          |
|---------------|-------|------|----|----|-----------------------|--------|------|----|--------------|------------|------|-------|----------|
|               | VH    | D    | RF | JH | CDR3 (aa)             | Length | Vk   | Jk | CDR3 (aa)    | Length     | Poly | HEp-2 | Staining |
| neHDE.II 22   | 3-11  | 5-12 | 3  | 4  | ALATVPSD              | 8      | 3-15 | 2  | QQYNNWPR     | 8          | +    | -     | -        |
| neHDE.II 23   | 4-61  | 1-26 | 1  | 4  | VNSGWELPLSGGHFDY      | 16     | 3-20 | 4  | QQYGSSPLT    | 9          | -    | +     | -        |
| neHDE.II 24 # | 3-33  | 2-15 | 2  | 6  | DRRGCSGGSCYNIDYYGMD   | 20     | 1-39 | 1  | QQSYSTPWT    | 9          | -    | -     | -        |
| neHDE.II 25   | 3-33  | 6-13 | 3  | 5  | DEAAAVNWFD            | 12     | 1-39 | 2  | QQSYSTPMYT   | 10         | -    | -     | -        |
| neHDE.II 26   | 3-53  | 6-19 | 2  | 4  | LSSGCAQPLSVCYDY       | 15     | 1-27 | 1  | QKYNAPLWT    | 10         | -    | -     | -        |
| neHDE.II 27   | 4-4   | 1-26 | 3  | 2  | VPVGATLYFDL           | 11     | 3-11 | 2  | QQRSNWPPGYT  | 11         | -    | -     | c        |
| neHDE.II 35   | 3-30  | 3-10 | 2  | 4  | DSGVNLYYGGSYFDY       | 17     | 1-39 | 4  | QQSYSTPLT    | 9          | -    | -     | -        |
| neHDE.II 36 # | 4-34  | 2-15 | 2  | 5  | GRYCSGGSCYSRPRFGNNWFD | 22     | 3-20 | 2  | QQYGSSPQT    | 9          | -    | -     | -        |
| neHDE.II 37   | 4-39  | 3-22 | 3  | 2  | PLNDYYDSSGHDAFDI      | 16     | 3-20 | 1  | QQYGSSPRT    | 9          | -    | -     | -        |
| neHDE.II 42   | 4-39  | /    | /  | 3  | RPLHDAFDI             | 9      | 3-15 | 5  | QQYNNWPPIT   | 11         | +2   | +     | -        |
| neHDE.II 44   | 1-8   | 3-22 | 2  | 4  | GPQQYYDSSGPRDY        | 15     | 3-20 | 2  | QQYGSSPNT    | 9          | -    | -     | -        |
| neHDE.II 45   | 3-11  | 6-19 | 3  | 4  | PSKNAVAGIIDY          | 13     | 3-15 | 1  | QQYNNWPRT    | 9          | -    | -     | -        |
| neHDE.II 46   | 4-61  | 3-22 | 3  | 5  | GITMIVVPGV            | 11     | 1-5  | 1  | QQYNSYFWT    | 9          | +2   | +2    | N        |
| neHDE.II 47   | 3-23  | 3-9  | 2  | 4  | MYDILTYEASDNKYFFDY    | 21     | 3-15 | 1  | QQYNNWPPRGT  | 11         | -    | -     | -        |
| neHDE.II 48   | 3-73  | 3-9  | 2  | 4  | VGGDYDILTYYSFDY       | 16     | 2-28 | 1  | MQUALQTPGA   | 9          | -    | +     | -        |
|               | VH    | D    | RF | JH | CDR3 (aa)             | Length | Vλ   | Jλ | CDR3 (aa)    | Length     | Poly | HEp-2 | Staining |
| neHDE.II 03   | 3-11  | 4-23 | 2  | 4  | EPYGGNPLYFFDY         | 13     | 8-61 | 3  | VLYMGSGISV   | 11         | -    | +     | c        |
| neHDE.II 06   | 3-48  | 3-9  | 1  | 6  | DQNRYSWLLS            | 11     | 3-21 | 1  | QVWSSSDHRGVV | 15         | -    | +2    | -        |
| neHDE.II 12   | 4-31  | 5-24 | 2  | 4  | GPDGYKFDY             | 9      | 1-47 | 3  | AAWDDSLSGHVV | 12         | -    | -     | -        |
| neHDE.II 15   | 3-23  | 3-3  | 3  | 4  | DLFAIFGVVIRGHYFDY     | 19     | 1-44 | 3  | AAWDDSLNGPV  | 11         | +    | +     | N        |
| neHDE.II 20   | 4-39  | 3-3  | 2  | 4  | VGNFWSGYTLFDY         | 15     | 3-21 | 3  | QVWSSSDHPWV  | 13         | -    | -     | -        |
| neHDE.II 34   | 1-69  | 6-13 | 2  | 4  | SQYSSSWYHFDY          | 12     | 1-41 | 3  | LAWDTSPRAWV  | 11         | -    | +     | -        |
| neHDE.II 28   |       |      |    |    |                       |        | 3-21 | 3  | QVWSSSDHQV   | 11         |      |       |          |
|               | VH    | D    | RF | JH | CDR3 (aa)             | Length | V    | J  | CDR3 (aa)    | Length     | Poly | HEp-2 | Staining |
| neHDE.II 43   | 3-9   | 3-22 | 3  | 3  | DLFRITMIVGGAFDI       | 15     |      |    |              |            |      |       |          |

RF, reading frame; #, antibody failed to be expressed

-, non-reactive; +, reactive; +2, highly reactive

c, diffuse cytoplasmic staining; A, actin staining; G, Golgi staining; M, mitochondria staining; N, nuclear staining



**Supplemental Table 6.** Repertoire and reactivity of antibodies from new emigrant B cells of healthy donor D.III.

| Ig             | HEAVY |      |    |    |                        | LIGHT  |      |    |             |        | REACTIVITY |       |          |
|----------------|-------|------|----|----|------------------------|--------|------|----|-------------|--------|------------|-------|----------|
|                | VH    | D    | RF | JH | CDR3 (aa)              | Length | Vk   | Jk | CDR3 (aa)   | Length | Poly       | HEp-2 | Staining |
| neHDD.III 04   | 3-7   | 6-25 | 2  | 6  | DLGYYYGMDV             | 10     | 3-20 | 2  | QQYGSSPLYT  | 11     | -          | -     | -        |
| neHDD.III 06 # | 3-30  | 3-22 | 2  | 4  | ERRVYDSSGGYDY          | 14     | 1-5  | 2  | QQYNSYPYS   | 10     | -          | -     | -        |
| neHDD.III 08   | 3-15  | 6-6  | 2  | 5  | DQDSSPGRGIL            | 11     | 2-28 | 2  | MQALQTLT    | 8      | -          | -     | -        |
| neHDD.III 09 # | 4-31  | 3-22 | 3  | 4  | GSPTMIKAAWFYFDY        | 16     | 3-11 | 5  | QQYNSYPIT   | 9      | -          | -     | -        |
| neHDD.III 12   | 3-9   | 5-12 | 2  | 4  | DPGAYSGYDPRGDYFDY      | 17     | 1-9  | 4  | QQLNSYPRVT  | 10     | -          | -     | -        |
| neHDD.III 13   | 4-59  | 5-5  | 3  | 4  | LLHARAMVYFDY           | 12     | 1-39 | 2  | QQSYSTPYT   | 9      | +          | +     | A        |
| neHDD.III 17 # | 1-18  | 3-22 | 3  | 4  | DRVTILGADY             | 10     | 3-11 | 5  | QQRSNWPA    | 8      | -          | -     | -        |
| neHDD.III 18 # | 5-51  | /    | /  | 6  | HLSPVDVPHYYYGMDV       | 17     | 1-39 | 2  | QQSYSTPPYT  | 10     | -          | -     | -        |
| neHDD.III 19   | 1-69  | 3-22 | 2  | 5  | SHPYDSSGGYSP           | 12     | 1-27 | 3  | QKYNSAPFT   | 9      | +2         | +     | -        |
| neHDD.III 20   | 4-30  | 4-17 | 2  | 3  | RPPFYGDYSSDDAFDI       | 16     | 1-5  | 2  | QQYNSYWT    | 8      | -          | -     | -        |
| neHDD.III 21   | 3-7   | 3-22 | 2  | 3  | DDYDSSGYNWGAFDI        | 15     | 1-39 | 5  | QQSYSTPRGAT | 8      | -          | -     | -        |
| neHDD.III 22   | 5-51  | 3-10 | 2  | 2  | SRGDYDSSGGYWFYFDL      | 17     | 3-20 | 3  | QQYGSSPIFT  | 10     | -          | -     | -        |
| neHDD.III 23   | 4-39  | /    | /  | 4  | TGAFDY                 | 6      | 3-11 | 1  | QQRSNWPPWT  | 10     | +          | +     | -        |
| neHDD.III 25   | 4-34  | 2-2  | 3  | 5  | RRDGTGVVPAQAQYNWFDP    | 20     | 1-39 | 4  | QQSYSTPLT   | 9      | -          | -     | -        |
| neHDD.III 27   | 3-7   | 3-3  | 1  | 4  | SRGGFLEWLPESEFDY       | 15     | 1-27 | 3  | QKYNSAPLT   | 9      | -          | -     | -        |
| neHDD.III 29   | 3-21  | 3-22 | 2  | 4  | GDSSGGYLDQNDY          | 13     | 3-11 | 2  | QQRSNWPPYS  | 10     | -          | +     | -        |
| neHDD.III 33   | 4-30  | 2-2  | 3  | 5  | GAUVGNWFDP             | 10     | 3-11 | 2  | QQRSNWYT    | 8      | -          | -     | -        |
| neHDD.III 39 # | 3-33  | 3-3  | 1  | 6  | DLKYGAERPLEWSLNNYYGMDV | 22     | 3-15 | 5  | QQYNNWPWLT  | 10     | -          | -     | -        |
|                | VH    | D    | RF | JH | CDR3 (aa)              | Length | Vλ   | Jλ | CDR3 (aa)   | Length | Poly       | HEp-2 | Staining |
| neHDD.III 05   | 3-15  | 6-13 | 2  | 5  | ELGLRGSWFDP            | 11     | 3-1  | 2  | QAWDSSVVV   | 9      | -          | -     | -        |
| neHDD.III 10   | 3-49  | 2-2  | 3  | 6  | EGGRDIVVPAADYYYYGMDV   | 22     | 3-27 | 3  | YSAADNNQV   | 9      | +          | -     | -        |
| neHDD.III 12   | 3-9   | 5-12 | 2  | 4  | DPGAYSGYDPRGDYFDY      | 17     | 1-51 | 2  | GTWDSSLSAGV | 11     | -          | -     | -        |
| neHDD.III 16   | 3-9   | 4-4  | 2  | 6  | VETYSNDLLYYGMDV        | 15     | 1-47 | 3  | AAWDDSLSGWV | 11     | -          | -     | -        |
| neHDD.III 24   | 3-30  | 2-15 | 3  | 4  | PARVVVAARTYYFDY        | 15     | 3-25 | 2  | QSADSSGTYVV | 11     | +          | +     | -        |
| neHDD.III 26   | 1-18  | 4-17 | 2  | 6  | QSDGDYRYYYGMDV         | 15     | 1-40 | 3  | QSYDSSLSGWV | 11     | -          | +     | -        |
| neHDD.III 30   | 4-34  | 5-24 | 3  | 4  | QSDRLPAMATTQFDY        | 16     | 1-51 | 2  | GTWDSSLSAGV | 11     | -          | -     | -        |
| neHDD.III 32   | 3-23  | /    | /  | 6  | DAPDIPARGWDYGMDV       | 16     | 1-44 | 2  | AWDDSLNGVV  | 10     | -          | -     | -        |
| neHDD.III 34   | 4-59  | 6-6  | 3  | 5  | IAARPMQWWFDP           | 12     | 3-1  | 2  | QAWDSSTVV   | 9      | -          | +     | -        |
| neHDD.III 37   | 4-4   | 3-9  | 2  | 4  | EGTITPFDY              | 9      | 1-41 | 3  | LAWDTSRAWV  | 11     | -          | +     | -        |
|                | VH    | D    | RF | JH | CDR3 (aa)              | Length | V    | J  | CDR3 (aa)   | Length | Poly       | HEp-2 | Staining |
| neHDD.III 03   | 3-30  | 3-22 | 2  | 4  | DGAYYDSSGAYY           | 13     |      |    |             |        |            |       |          |
| neHDD.III 28   | 1-58  | 6-13 | 3  | 4  | TSPLSIAAAYYFDY         | 14     |      |    |             |        |            |       |          |
| neHDD.III 32   | 3-23  | /    | /  | 6  | DAPDIPARGWDYGMDV       | 16     |      |    |             |        |            |       |          |

RF, reading frame; #, antibody failed to be expressed

-, non-reactive; +, reactive; +2, highly reactive

c, diffuse cytoplasmic staining; A, actin staining; G, Golgi staining; M, mitochondria staining; N, nuclear staining

**Supplemental Table 7.** Repertoire and reactivity of antibodies from new emigrant B cells of CVID patient 321.

| Ig             | HEAVY |      |    |    |                         |        | LIGHT |    |             |        | REACTIVITY |       |          |
|----------------|-------|------|----|----|-------------------------|--------|-------|----|-------------|--------|------------|-------|----------|
|                | VH    | D    | RF | JH | CDR3 (aa)               | Length | Vk    | Jk | CDR3 (aa)   | Length | Poly       | HEp-2 | Staining |
| neCVID321 05   | 4-59  | /    | /  | 4  | GGPPDY                  | 6      | 1-5   | 4  | QQYNSYLLT   | 9      | +          | +2    | c        |
| neCVID321 10   | 3-30  | 1-26 | 1  | 4  | DYAGKWELPSYFDY          | 14     | 1-16  | 4  | QQYNSYPLT   | 9      | -          | -     | -        |
| neCVID321 16   | 4-31  | /    | /  | 6  | ESRAVYYYGMDV            | 12     | 1-16  | 1  | QQYNSYPRT   | 9      | -          | -     | -        |
| neCVID321 33   | 3-33  | 3-3  | 3  | 6  | NTIFGVVIAYYYGMDV        | 16     | 1-9   | 1  | QQLNSYPQT   | 9      | +2         | -     | c        |
| neCVID321 45   | 3-30  | 2-15 | 2  | 6  | VLRDCSGGSCYSGYYYYGMDV   | 22     | 3-15  | 5  | QQYNNWPPIT  | 10     | -          | +     | -        |
| neCVID321 50   | 1-18  | 3-22 | 3  | 6  | VSTMIVAEENYYYGMDV       | 17     | 1-39  | 3  | QQSYSTPLFT  | 10     | -          | -     | -        |
| neCVID321 52   | 3-15  | 3-22 | 2  | 3  | GTYYDSSGYGAFDI          | 15     | 1-27  | 4  | QKYNALQT    | 9      | -          | -     | -        |
| neCVID321 53   | 1-69  | 3-22 | 2  | 4  | DARATYYDSSGYHHYD        | 18     | 3-20  | 5  | QQYSSSPIT   | 9      | +          | -     | -        |
| neCVID321 61   | 4-34  | 6-6  | 3  | 5  | ALPIAAREGWFD            | 13     | 1-9   | 4  | QQLNSYPRT   | 9      | +          | +     | c        |
| neCVID321 64   | 3-23  | 4-17 | 3  | 4  | DRADTTVTYRFDY           | 14     | 1-33  | 3  | QQYDNLST    | 9      | -          | -     | -        |
| neCVID321 66   | 4-59  | 7-27 | 2  | 5  | GGYGIPNWFDP             | 11     | 1-39  | 1  | QQSYSTLWT   | 9      | -          | +     | -        |
| neCVID321 68 # | 1-3   | 3-9  | 2  | 4  | FPTVGITSPVDY            | 12     | 3-11  | 1  | QQRSNWPRWT  | 10     |            |       |          |
| neCVID321 78   | 4-59  | 1-26 | 3  | 6  | DRPIVGAPYGM             | 13     | 3-20  | 1  | QQYSSSPWT   | 9      | -          | +     | -        |
| neCVID321 79   | 3-23  | 3-22 | 2  | 4  | GDYYDGTGEDY             | 12     | 1-16  | 5  | QQYNSYPRE   | 9      | -          | +     | -        |
| neCVID321 86   | 3-23  | 5-24 | 1  | 4  | GRGLQFFSHDY             | 11     | 1-16  | 3  | QQYNSYPLT   | 9      | -          | +     | N,       |
|                | VH    | D    | RF | JH | CDR3 (aa)               | Length | Vλ    | Jλ | CDR3 (aa)   | Length | Poly       | HEp-2 | Staining |
| neCVID321 01   | 3-23  | 3-22 | 2  | 4  | SPLYDSSGYPIGGFDY        | 17     | 1-40  | 2  | QSYDSSLV    | 10     | -          | -     | -        |
| neCVID321 06   | 3-15  | 3-22 | 1  | 6  | DVLLPYYYGMDV            | 12     | 1-47  | 3  | AAWDDSLGGV  | 11     | -          | +     | -        |
| neCVID321 09   | 3-48  | 3-22 | 3  | 4  | ALGVVTHYFDY             | 12     | 3-21  | 2  | QWWDSSDHV   | 11     | -          | -     | -        |
| neCVID321 18   | 3-74  | 2-2  | 2  | 6  | VPRGIYCSSTSCYEAHHYYGMDV | 24     | 1-40  | 1  | QSYDSSLGYV  | 11     | -          | +     | c        |
| neCVID321 19 # | 1-2   | 6-13 | 2  | 6  | SPAYSSWYYYGMDV          | 16     | 2-14  | 2  | SSYTSSSTLE  | 10     |            |       |          |
| neCVID321 25   | 3-21  | 6-19 | 2  | 4  | EDSSGLIQYYFDY           | 13     | 1-44  | 1  | AAWDDSLNGYV | 11     | -          | -     | -        |
| neCVID321 26   | 1-18  | 4-17 | 3  | 6  | HIMGATVTPRPDYGMDV       | 20     | 2-14  | 1  | SSYTSSSTYV  | 10     | -          | -     | -        |
| neCVID321 30   | 4-34  | 6-19 | 1  | 4  | DGQWLVRGFDY             | 11     | 1-40  | 2  | QSYDSSLVWV  | 11     | -          | -     | c        |
| neCVID321 31   | 4-24  | 3-22 | 2  | 4  | GLYYDSSGYTD             | 12     | 2-14  | 2  | SSYTSSSTLV  | 10     | -          | -     | -        |
| neCVID321 33   |       |      |    |    | see kappa               |        | 2-23  | 3  | CSYAGSSTWV  | 10     | +2         | +2    | -        |
|                | VH    | D    | RF | JH | CDR3 (aa)               | Length | V     | J  | CDR3 (aa)   | Length | Poly       | HEp-2 | Staining |
| neCVID321 17   | 3-21  | 4-17 | 2  | 6  | DPSGFGGDYVYYYGMDV       | 20     |       |    |             |        |            |       |          |
| neCVID321 22   | 4-34  | 3-3  | 3  | 5  | GRLTGIFGVDFDP           | 15     |       |    |             |        |            |       |          |

RF, reading frame; #, antibody failed to be expressed

-, non-reactive; +, reactive; +2, highly reactive

c, diffuse cytoplasmic staining; A, actin staining; G, Golgi staining; M, mitochondria staining; N, nuclear staining

**Supplemental Table 8.** Repertoire and reactivity of antibodies from new emigrant B cells of CVID patient Y17.

| Ig             | HEAVY |      |    |    |                          |        | LIGHT |    |               |        | REACTIVITY |       |          |
|----------------|-------|------|----|----|--------------------------|--------|-------|----|---------------|--------|------------|-------|----------|
|                | VH    | D    | RF | JH | CDR3 (aa)                | Length | Vk    | Jk | CDR3 (aa)     | Length | Poly       | HEp-2 | Staining |
| neCVIDY17 01 # | 3-9   | /    | /  | 6  | EGYYGMDV                 | 8      | 1-6   | 4  | LQDYNYPRLT    | 10     |            |       |          |
| neCVIDY17 02   | 3-13  | /    | /  | 4  | SSTPDQSGAEGFDY           | 14     | 3-20  | 1  | QQYGSLLWT     | 9      | -          | -     | c        |
| neCVIDY17 04   | 3-48  | 3-10 | 2  | 6  | DQNYGSGSYRPERGYYYGMDV    | 22     | 2-28  | 2  | MQALQTPPKYMYT | 13     | -          | -     | -        |
| neCVIDY17 06   | 3-30  | 6-19 | 3  | 1  | DNPKSIAVAGGAIEYFQH       | 17     | 4-1   | 4  | QQYYSTPLT     | 9      | -          | +     | -        |
| neCVIDY17 07   | 3-33  | 3-10 | 2  | 4  | GHEIPGSGSYNSVDY          | 16     | 1-16  | 1  | QQYNSYPRT     | 9      | -          | -     | -        |
| neCVIDY17 08   | 3-23  | 2-2  | 3  | 4  | PGRDIVVPAASFDY           | 15     | 4-1   | 3  | QQYYSTPFT     | 9      | -          | -     | -        |
| neCVIDY17 09   | 3-30  | 3-10 | 1  | 6  | DSLLWFGELAFDYMDV         | 17     | 4-1   | 1  | QQYYSTPPT     | 9      | +2         | +     | -        |
| neCVIDY17 11   | 3-49  | 3-22 | 2  | 4  | TRDKGSGSDY               | 10     | 2-28  | 4  | MQALQTPST     | 9      | -          | -     | -        |
| neCVIDY17 12   | 1-58  | 1-26 | 1  | 4  | DKWELGDFDY               | 10     | 3-15  | 2  | QQYNNWPPYT    | 10     | -          | +     | -        |
| neCVIDY17 14   | 3-11  | 3-9  | 1  | 3  | VFRDFDAFDI               | 10     | 3-20  | 5  | QQYGSSPIT     | 9      | -          | -     | -        |
| neCVIDY17 17   | 4-39  | 1-26 | 2  | 4  | HKSSPPPMYSGSLFDY         | 17     | 3-11  | 4  | QQRSNWPLT     | 9      | -          | +     | -        |
| neCVIDY17 19   | 1-2   | 2-8  | 2  | 5  | DRAGYCTNGVCYNWFDP        | 17     | 1-5   | 2  | QQYNSYSYS     | 9      | -          | -     | -        |
| neCVIDY17 20   | 1-18  | 3-10 | 1  | 4  | WFEGGKLPQDRRELGNVDY      | 19     | 2-28  | 4  | MQALQTPLT     | 9      | -          | -     | -        |
| neCVIDY17 21   | 3-11  | 6-19 | 3  | 4  | ARRVALAGSLHFDY           | 14     | 4-1   | 1  | QQYYSTPPT     | 9      | +          | +     | -        |
| neCVIDY17 23   | 3-15  | 3-10 | 3  | 4  | TTDFRGAIFDY              | 11     | 1-39  | 4  | QQSYSTPVL     | 10     | -          | -     | -        |
| neCVIDY17 27 # | 3-23  | 3-10 | 2  | 4  | DGPHGSGSYFFGY            | 14     | 1-39  | 2  | QQSYSTPPYT    | 10     |            |       |          |
| neCVIDY17 30   | 3-7   | 2-15 | 2  | 6  | VATDCSGGSCYSPVLGYYYYGMDV | 25     | 1-13  | 5  | QQFNYSYIS     | 9      | +          | +     | c        |
| neCVIDY17 32   | 3-23  | 4-4  | 2  | 5  | DFTFNYSNLEGWFDY          | 16     | 3-20  | 4  | QQYGSPLT      | 9      | -          | -     | -        |
| neCVIDY17 34 # | 3-21  | 2-2  | 1  | 6  | VVDERGYQLLSYYYGMDV       | 19     | 2-28  | 4  | MQALQTLPLT    | 10     |            |       |          |
| neCVIDY17 36   | 3-73  | 3-22 | 2  | 4  | LGYYDSSGYYYVNFYD         | 17     | 2-28  | 5  | MQALQTPP      | 8      | +2         | +     | -        |
| neCVIDY17 37   | 3-43  | 1-7  | 2  | 4  | PRGYNSSGYYWDFDY          | 15     | 3-15  | 1  | QQYNNWPPWT    | 10     | -          | -     | -        |
| neCVIDY17 38   | 3-33  | 4-17 | 3  | 6  | DLISMFTVTTHNLYYYYGMDV    | 21     | 3-11  | 4  | QQRSNWPLT     | 9      | +          | +     | -        |
| neCVIDY17 41   | 4-59  | 2-21 | 2  | 3  | RGFCGGDCYRAFDI           | 14     | 3-20  | 2  | QQYGSPPMYT    | 10     | -          | +     | -        |
| neCVIDY17 42   | 3-48  | 4-17 | 3  | 6  | EEGMTVTITDPGANGMDV       | 18     | 2-24  | 2  | MQATQFPRT     | 9      | -          | -     | -        |
| neCVIDY17 44   | 4-34  | 3-22 | 2  | 4  | GERNSSGVYFDY             | 12     | 1-39  | 3  | QQSYSTPRT     | 9      | -          | -     | -        |
| neCVIDY17 46 # | 1-69  | 4-17 | 3  | 4  | RRVEPVTVTITPLDY          | 15     | 1-39  | 4  | QQSYNT        | 6      |            |       |          |
| neCVIDY17 16   |       |      |    |    |                          |        | 1-39  | 1  | QQSYSTPWT     | 9      |            |       |          |
|                | VH    | D    | RF | JH | CDR3 (aa)                | Length | Vλ    | Jλ | CDR3 (aa)     | Length | Poly       | HEp-2 | Staining |
| neCVIDY17 10   | 3-15  | /    | /  | 4  | TTAFF                    | 5      | 2-14  | 3  | SSYTSSSTWV    | 10     | -          | +     | -        |
| neCVIDY17 15   | 3-11  | 7-27 | 3  | 4  | GFSGDLRDLVDY             | 12     | 1-44  | 2  | AAWDDSLNGPV   | 11     | -          | -     | -        |
| neCVIDY17 18   | 3-23  | 6-13 | 3  | 3  | PAAADAFDI                | 9      | 2-14  | 3  | SSYTSSSRV     | 9      | -          | -     | -        |
| neCVIDY17 19   | 1-2   | 2-8  | 2  | 5  | DRAGYCTNGVCYNWFDP        | 17     | 2-23  | 2  | CSYAGSSV      | 9      | -          | +     | c        |
| neCVIDY17 24   | 1-18  | 3-22 | 2  | 4  | DRYYYDSSGYCHFDFY         | 15     | 2-14  | 2  | SSYTSSSTHVV   | 11     | +          | -     | -        |
| neCVIDY17 26   | 3-23  | 3-22 | 2  | 4  | YLPQDTRPPYDSSGYYYGFDY    | 21     | 7-43  | 3  | LLYYGGAQGV    | 10     | +          | -     | -        |
| neCVIDY17 28   | 1-18  | 3-10 | 2  | 4  | AHGSGSYRFDY              | 11     | 2-14  | 2  | SSYTSSSTL     | 9      | -          | -     | -        |
| neCVIDY17 31   | 3-43  | 3-9  | 2  | 4  | DLGIPYSSSPGGLDY          | 15     | 2-14  | 2  | SSYTSSSVV     | 10     | -          | -     | -        |
| neCVIDY17 32   | 3-23  | 4-4  | 2  | 5  | DFTFNYSNLEGWFDY          | 16     | 3-10  | 3  | YSTDSSGNHWSV  | 12     | +          | +     | c        |
| neCVIDY17 39   | 1-2   | 3-22 | 2  | 6  | DALYYDSSRSGYYYGMDV       | 23     | 2-14  | 1  | SSYTSSSTYV    | 10     | -          | +     | -        |
| neCVIDY17 40   | 1-18  | 1-7  | 2  | 4  | TQGENWNYGPTLSTYFYD       | 19     | 1-51  | 3  | GTWSSLSAGV    | 11     | -          | -     | -        |
| neCVIDY17 43   | 4-39  | 3-10 | 1  | 4  | QGGGRFGEFTFDY            | 13     | 2-23  | 2  | CSYAGSSTGV    | 10     | -          | -     | -        |
| neCVIDY17 13   |       |      |    |    |                          |        | 1-51  | 3  | GTWSSLSAGV    | 11     |            |       |          |
|                | VH    | D    | RF | JH | CDR3 (aa)                | Length | V     | J  | CDR3 (aa)     | Length | Poly       | HEp-2 | Staining |
| neCVIDY17 22   | 4-59  | 6-13 | 2  | 4  | LRSSCPCPDY               | 10     |       |    |               |        |            |       |          |
| neCVIDY17 29   | 3-30  | 5-5  | 3  | 6  | DGRVAMVVYDGMVDV          | 14     |       |    |               |        |            |       |          |
| neCVIDY17 35   | 5-51  | 3-9  | 2  | 4  | GVHDIPVFMH               | 11     |       |    |               |        |            |       |          |
| neCVIDY17 45   | 4-59  | 6-6  | 2  | 4  | ESIGPYSSSSRELYFDY        | 17     |       |    |               |        |            |       |          |

RF, reading frame; #, antibody failed to be expressed

-, non-reactive; +, reactive; +2, highly reactive

c, diffuse cytoplasmic staining; A, actin staining; G, Golgi staining; M, mitochondria staining; N, nuclear staining

**Supplemental Table 9.** Repertoire and reactivity of antibodies from new emigrant B cells of CVID patient B.I.

| Ig             | HEAVY |      |    |    |                        |        | LIGHT |    |             |        | REACTIVITY |       |          |
|----------------|-------|------|----|----|------------------------|--------|-------|----|-------------|--------|------------|-------|----------|
|                | VH    | D    | RF | JH | CDR3 (aa)              | Length | Vk    | Jk | CDR3 (aa)   | Length | Poly       | HEp-2 | Staining |
| neCVIDB.I.04 # | 1-69  | 2-8  | 2  | 6  | EKLHCTNGVCYTRYYYGMDV   | 20     | 1-39  | 2  | QQSYSTPRT   | 9      |            |       |          |
| neCVIDB.I.09   | 3-66  | 4-17 | 2  | 6  | DLGDYYYYYGMVDV         | 13     | 2-28  | 4  | MQALQTPLT   | 9      | -          | -     | -        |
| neCVIDB.I.11   | 3-30  | 2-21 | 3  | 4  | DLIVVTAIPDY            | 12     | 1-8   | 1  | QQYYSYPR    | 9      | +          | +     | -        |
| neCVIDB.I.12   | 1-2   | 6-6  | 1  | 4  | GGGGGQQLVWL            | 12     | 4-1   | 2  | QQYYSTPYT   | 9      | -          | -     | -        |
| neCVIDB.I.13   | 3-66  | 6-19 | 3  | 4  | DGANAVAGTHFDY          | 13     | 1-39  | 1  | QQSYSTPPWT  | 10     | -          | -     | -        |
| neCVIDB.I.14   | 3-9   | 3-22 | 2  | 4  | DMGDSSGLVDY            | 11     | 3-15  | 1  | QQYNNWLSWT  | 10     | -          | -     | -        |
| neCVIDB.I.28   | 3-23  | 3-22 | 3  | 5  | DPLITMICCAEPLDP        | 16     | 1-27  | 4  | QKYNAPRT    | 9      | +          | +     | c        |
| neCVIDB.I.30   | 3-30  | 3-22 | 2  | 4  | DISSGYPTNPFDY          | 14     | 1-39  | 3  | QQSYSTPIT   | 9      | -          | -     | -        |
| neCVIDB.I.36   | 3-49  | 6-19 | 3  | 4  | EVAATDY                | 7      | 1-39  | 2  | QQSYSTPRT   | 9      | -          | -     | -        |
| neCVIDB.I.40   | 3-23  | 3-3  | 2  | 4  | YYDFWSGETIDY           | 12     | 3-11  | 4  | QQRSNWPRLT  | 10     | -          | -     | -        |
| neCVIDB.I.42   | 3-33  | 6-19 | 3  | 4  | DIAVAPEYGG             | 10     | 3-11  | 1  | QQRSNWPRWT  | 10     | +          | +     | -        |
| neCVIDB.I.48   | 3-15  | 1-26 | 3  | 2  | VGATHPLLDWYFDL         | 14     | 2-28  | 4  | MQALQTPLT   | 9      | -          | +     | c        |
|                | VH    | D    | RF | JH | CDR3 (aa)              | Length | VA    | JA | CDR3 (aa)   | Length | Poly       | HEp-2 | Staining |
| neCVIDB.I.14   | 3-9   | 3-22 | 2  | 4  | DMGDSSGLVDY            | 11     | 2-14  | 2  | SSYTSSTWV   | 10     | -          | -     | c        |
| neCVIDB.I.18   | 4-34  | 4-17 | 2  | 4  | GRSYGDYGSYFDY          | 14     | 3-1   | 1  | QAWDSSLTYV  | 10     | -          | +     | N        |
| neCVIDB.I.29   | 4-34  | /    | /  | 4  | GGMVKREFDY             | 10     | 3-21  | 2  | QVWSSSDHPGV | 12     | -          | +     | c        |
| neCVIDB.I.34   | 1-8   | /    | /  | 6  | VRYGMDV                | 7      | 1-44  | 2  | AAWDDSLNGLV | 11     | -          | -     | -        |
| neCVIDB.I.42 # | 3-33  | 6-19 | 3  | 4  | DIAVAPEYGG             | 10     | 1-40  | 1  | QSYDSSLQGV  | 11     |            |       |          |
| neCVIDB.I.48 # | 3-15  | 1-26 | 3  | 2  | VGATHPLLDWYFDL         | 14     | 2-23  | 1  | CSYAGSSTRV  | 10     |            |       |          |
|                | VH    | D    | RF | JH | CDR3 (aa)              | Length | V     | J  | CDR3 (aa)   | Length | Poly       | HEp-2 | Staining |
| neCVIDB.I.01   | 3-21  | 4-17 | 3  | 5  | DYYITVTRDGKFNWFDP      | 17     |       |    |             |        |            |       |          |
| neCVIDB.I.15   | 4-34  | 2-15 | 2  | 5  | GRYCSGGSCYSRPRFGNNWFDP | 22     |       |    |             |        |            |       |          |
| neCVIDB.I.16   | 3-21  | 4-17 | 3  | 5  | DYYITVTRDGKFNWFDP      | 17     |       |    |             |        |            |       |          |
| neCVIDB.I.21   | 1-69  | 2-2  | 2  | 5  | EGLRYCGDCSPGGGRFDP     | 19     |       |    |             |        |            |       |          |
| neCVIDB.I.31   | 3-49  | 1-26 | 2  | 5  | YSGSYWAWFDP            | 11     |       |    |             |        |            |       |          |
| neCVIDB.I.32   | 4-4   | 3-3  | 3  | 6  | EDPQSTIFGSESTRVYGMDV   | 20     |       |    |             |        |            |       |          |
| neCVIDB.I.41   | 3-7   | 2-2  | 3  | 4  | ARDGDIVVPAAYDY         | 15     |       |    |             |        |            |       |          |

RF, reading frame; #, antibody failed to be expressed

-, non-reactive; +, reactive; +2, highly reactive

c, diffuse cytoplasmic staining; A, actin staining; G, Golgi staining; M, mitochondria staining; N, nuclear staining

**Supplemental Table 10.** Repertoire and reactivity of antibodies from new emigrant B cells of CVID patient G.I.

| Ig             | HEAVY |      |    |    |                      |        | LIGHT |    |              |        | REACTIVITY |       |          |
|----------------|-------|------|----|----|----------------------|--------|-------|----|--------------|--------|------------|-------|----------|
|                | VH    | D    | RF | JH | CDR3 (aa)            | Length | Vk    | Jk | CDR3 (aa)    | Length | Poly       | HEp-2 | Staining |
| neCVIDG.I 03   | 4-31  | 3-22 | 2  | 5  | DRFHYYDSSGLSSFDP     | 16     | 1-39  | 2  | QQSYSTPYT    | 9      | -          | -     | -        |
| neCVIDG.I 07   | 3-30  | 3-22 | 2  | 4  | ARLTYYYDSSGYLGY      | 15     | 1-5   | 1  | QQYNSYSTA    | 9      | -          | +2    | N        |
| neCVIDG.I 08   | 1-18  | 1-26 | 1  | 4  | DWGELLKRKGIDY        | 13     | 1-9   | 1  | QQLNSYPRT    | 9      | +          | +     | A        |
| neCVIDG.I 10   | 3-30  | 6-6  | 2  | 4  | AGYSSSAGAFDY         | 12     | 1-39  | 2  | QQSYSTPYT    | 9      | -          | -     | c        |
| neCVIDG.I 11   | 3-21  | 3-10 | 2  | 4  | DRTGYYGSGSYPHHQLTDY  | 20     | 1-33  | 4  | QQYDNLPPPT   | 9      | -          | -     | -        |
| neCVIDG.I 12   | 4-34  | 5-5  | 2  | 4  | VVAALGYSYGTDFDY      | 15     | 3-20  | 2  | QQYGSSRRT    | 9      | -          | +     | -        |
| neCVIDG.I 18   | 3-23  | 5-24 | 2  | 4  | SYNLVRWCFDY          | 11     | 3-15  | 1  | QQYNNWPRT    | 9      | +          | -     | A        |
| neCVIDG.I 26   | 1-2   | 3-3  | 1  | 4  | DFTRGDFLEWLPNDY      | 15     | 3-20  | 1  | QQYGSSPRT    | 9      | -          | -     | -        |
| neCVIDG.I 27   | 1-24  | 3-10 | 2  | 4  | WDYGSGSYNVGVPIDY     | 17     | 1-27  | 1  | QKYNSAPRT    | 9      | -          | -     | -        |
| neCVIDG.I 39   | 4-39  | 6-19 | 3  | 4  | QRAVAGRDY            | 10     | 3D-11 | 3  | QQRSNWRGFT   | 9      | -          | -     | -        |
| neCVIDG.I 44   | 3-21  | 1-26 | 3  | 4  | DLVGATTGFDY          | 11     | 3-11  | 1  | QQRSNWPPWT   | 10     | -          | +     | -        |
| neCVIDG.I 45   | 3-33  | 3-3  | 1  | 4  | DRGRFLEWLFDY         | 12     | 1-27  | 1  | HSGPSRT      | 19     | -          | +     | c        |
| neCVIDG.I 48   | 1-18  | 2-15 | 2  | 6  | GPPNYCSGGSCYSVCMCV   | 19     | 3-20  | 2  | QQYGSSPMYT   | 10     | +          | -     | -        |
|                | VH    | D    | RF | JH | CDR3 (aa)            | Length | Vλ    | Jλ | CDR3 (aa)    | Length | Poly       | HEp-2 | Staining |
| neCVIDG.I 05   | 3-74  | 6-19 | 3  | 3  | EFGLGIAVAGHSAFDI     | 16     | 2-23  | 3  | CSYAGSSV     | 9      | +          | -     | -        |
| neCVIDG.I 26   | 1-2   | 3-3  | 1  | 4  | DFTRGDFLEWLPNDY      | 15     | 2-14  | 3  | SSYTSSSTRV   | 10     | -          | +     | -        |
| neCVIDG.I 29 # | 3-23  | 3-3  | 2  | 4  | VPSHYDFWSGYLDY       | 14     | 2-14  | 3  | SSYTSSSTPHWV | 12     |            |       |          |
| neCVIDG.I 33   | 3-33  | 6-13 | 2  | 4  | VEATSSSWYVLDY        | 13     | 2-11  | 3  | CSYAGSYTLV   | 10     | -          | -     | c        |
| neCVIDG.I 42   | 3-33  | 1-26 | 3  | 4  | GGVVGATTHYFDY        | 13     | 1-51  | 3  | GTWDSSLSAVV  | 11     | -          | -     | -        |
| neCVIDG.I 43 # | 4-34  | 6-19 | 3  | 4  | GAETAVAGRGYFFDY      | 15     | 3-1   | 3  | QAWDSSTEGVV  | 11     |            |       |          |
| neCVIDG.I 46 # | 4-34  | 3-3  | 2  | 5  | GRTYYDFWSGYAQQDWDFDP | 20     | 3-20  | 2  | QQYGSSPMYT   | 11     |            |       |          |
| neCVIDG.I 22   |       |      |    |    |                      |        | 1-40  | 3  | QSYDSSLGWW   | 11     |            |       |          |
|                | VH    | D    | RF | JH | CDR3 (aa)            | Length | V     | J  | CDR3 (aa)    | Length | Poly       | HEp-2 | Staining |
| neCVIDG.I 25   | 5-51  | 3-22 | 2  | 5  | QSPGDYDSSGYYYFEWDFP  | 20     |       |    |              |        |            |       |          |

RF, reading frame; #, antibody failed to be expressed

-, non-reactive; +, reactive; +2, highly reactive

c, diffuse cytoplasmic staining; A, actin staining; G, Golgi staining; M, mitochondria staining; N, nuclear staining

**Supplemental Table 11.** Repertoire and reactivity of antibodies from new emigrant B cells of CVID patient A.II.1.

| Ig                | HEAVY |      |    |    |                      | LIGHT  |                |                |              | REACTIVITY |      |       |          |
|-------------------|-------|------|----|----|----------------------|--------|----------------|----------------|--------------|------------|------|-------|----------|
|                   | VH    | D    | RF | JH | CDR3 (aa)            | Length | V <sub>k</sub> | J <sub>k</sub> | CDR3 (aa)    | Length     | Poly | HEp-2 | Staining |
| neCVIDA.II.1 01   | 3-15  | 3-10 | 1  | 4  | ALLWFGELLYLPAH       | 14     | 1-9            | 1              | QQLNSYPRT    | 9          | +2   | +     | c        |
| neCVIDA.II.1 05 # | 3-21  | 2-8  | 3  | 4  | DGAPIVLKPDDY         | 12     | 1-5            | 2              | QQYNSYPMYT   | 10         |      |       |          |
| neCVIDA.II.1 07   | 4-59  | 6-13 | 1  | 5  | SPKLVLDGLVNVWFDP     | 15     | 1-39           | 3              | QQSYSTRMFT   | 10         | -    | -     | -        |
| neCVIDA.II.1 15   | 3-11  | 6-19 | 3  | 3  | AVAGQVGEDAFDI        | 13     | 1-27           | 3              | QKYNSAPFT    | 9          | -    | -     | -        |
| neCVIDA.II.1 21   | 3-48  | 4-17 | 2  | 4  | DNGDYVPDI            | 9      | 1-17           | 4              | LQHNSYPQLT   | 10         | -    | +     | -        |
| neCVIDA.II.1 25   | 4-39  | /    | /  | 3  | SDFDI                | 5      | 4-1            | 4              | QQYYSTPPT    | 9          | -    | +2    | c        |
| neCVIDA.II.1 26   | 4-34  | 2-15 | 3  | 6  | SIPSDIVVVAVGIHYGMDV  | 20     | 3-20           | 1              | QQYGSSPRT    | 9          | +    | +2    | N        |
| neCVIDA.II.1 31 # | 3-33  | 2-21 | 2  | 6  | TIGAPVDCGGDCYTPYGMDV | 20     | 1-16           | 3              | QQYNSYPLFT   | 9          |      |       |          |
| neCVIDA.II.1 32   | 4-34  | 3-10 | 2  | 5  | VGPVRYGSGSYA         | 13     | 3-11           | 5              | QQRSNWLIT    | 9          | -    | +     | -        |
| neCVIDA.II.1 36   | 3-53  | 1-26 | 3  | 5  | IVGA                 | 4      | 1-5            | 1              | QQYNSYSPSWT  | 11         | +    | +     | -        |
| neCVIDA.II.1 37   | 4-31  | 1-7  | 2  | 4  | TGYNWNYVPEIIDY       | 14     | 3-15           | 4              | QQYNNWPPLT   | 10         | +    | +     | c        |
| neCVIDA.II.1 39   | 5-51  | /    | /  | 4  | IINRGY               | 6      | 1-6            | 3              | LQDYNYPFT    | 9          | +2   | +     | -        |
| neCVIDA.II.1 40   | 3-53  | 6-19 | 3  | 3  | HRNKAVAGTMGAFDI      | 15     | 1-17           | 2              | LQHNSYPPYT   | 10         | +    | +     | N        |
| neCVIDA.II.1 41   | 3-33  | 3-22 | 3  | 3  | GGAGMIVDDAFDI        | 13     | 3-20           | 3              | QQYGSSPFT    | 9          | -    | -     | -        |
| neCVIDA.II.1 42   | 3-21  | 1-26 | 3  | 5  | DTGNIVGARAFDP        | 14     | 1-8            | 3              | QQYYSYPLT    | 9          | -    | -     | -        |
| neCVIDA.II.1 47   | 3-38  | 6-19 | 2  | 4  | GGREYSSGWYVDY        | 13     | 3-15           | 2              | QQYNNWLYT    | 9          | -    | -     | -        |
|                   | VH    | D    | RF | JH | CDR3 (aa)            | Length | V <sub>λ</sub> | J <sub>λ</sub> | CDR3 (aa)    | Length     | Poly | HEp-2 | Staining |
| neCVIDA.II.1 01   |       |      |    |    | see kappa            |        | 1-40           | 2              | QSYDSSLVSVV  | 10         | +    | +2    | -        |
| neCVIDA.II.1 03   | 3-74  | 1-1  | 3  | 4  | DLRTTGTTVPSFGGY      | 15     | 1-51           | 2              | GTWDSSLSAPVV | 12         | -    | -     | -        |
| neCVIDA.II.1 13   | 3-30  | 6-13 | 2  | 6  | SSSSWYYYGMDV         | 13     | 1-44           | 2              | AAWDDSLNGVV  | 11         | -    | -     | -        |
| neCVIDA.II.1 18   | 3-48  | 2-2  | 2  | 6  | DMVDCSSTSCYSYYYGMDV  | 20     | 3-21           | 1              | QVWSSSDHYV   | 11         | -    | -     | -        |
| neCVIDA.II.1 22   | 1-69  | 1-26 | 3  | 4  | DKGVGADNFDY          | 11     | 1-40           | 3              | QSYDSSLSGWV  | 11         | +2   | +2    | c        |
| neCVIDA.II.1 23   | 4-34  | 3-22 | 2  | 4  | GAGASGDSSGYPSEFDY    | 18     | 1-40           | 3              | QSYDSSLSGWV  | 11         | -    | -     | -        |
| neCVIDA.II.1 27 # | 1-69  | 6-19 | 3  | 6  | DETVAGSTTGDDYGYGMDV  | 18     | 1-44           | 3              | AAWDDSLNGWV  | 11         |      |       |          |
| neCVIDA.II.1 30   | 4-31  | /    | /  | 3  | GASSAVGAFDI          | 11     | 2-14           | 1              | SSYTSSSTRI   | 10         | -    | -     | -        |
| neCVIDA.II.1 34   | 5-51  | 6-19 | 3  | 1  | QAVAGTSRYFQH         | 12     | 2-14           | 1              | SSYTSSSTLEV  | 11         | -    | -     | -        |
| neCVIDA.II.1 35   | 4-34  | 6-6  | 2  | 4  | GGYSSSDY             | 9      | 2-14           | 1              | SSYTSSSTLV   | 10         | -    | -     | -        |
| neCVIDA.II.1 43   | 3-13  | 3-9  | 2  | 4  | AILTGDDY             | 8      | 2-8            | 2              | SSYAGSNLNDVV | 10         | -    | -     | -        |
| neCVIDA.II.1 46   | 4-39  | 5-24 | 1  | 4  | GWLQFAHFDY           | 10     | 3-1            | 1              | QAWDSSNYV    | 9          | -    | +2    | c        |
| neCVIDA.II.1 24   |       |      |    |    |                      |        | 3-1            | 2              | QAWDSSTVV    | 9          |      |       |          |
|                   | VH    | D    | RF | JH | CDR3 (aa)            | Length | V              | J              | CDR3 (aa)    | Length     | Poly | HEp-2 | Staining |
| neCVIDA.II.1 17   | 1-69  | 3-3  | 2  | 6  | DTPRNDFWSGYHHSGMDV   | 18     |                |                |              |            |      |       |          |

RF, reading frame; #, antibody failed to be expressed

-, non-reactive; +, reactive; +2, highly reactive

c, diffuse cytoplasmic staining; A, actin staining; G, Golgi staining; M, mitochondria staining; N, nuclear staining

**Supplemental Table 12.** Repertoire and reactivity of antibodies from new emigrant B cells of CVID patient 1001.

| Ig                | HEAVY |      |    |    |                         |        | LIGHT |    |              |        | REACTIVITY |       |          |
|-------------------|-------|------|----|----|-------------------------|--------|-------|----|--------------|--------|------------|-------|----------|
|                   | VH    | D    | RF | JH | CDR3 (aa)               | Length | Vκ    | Jκ | CDR3 (aa)    | Length | Poly       | HEp-2 | Staining |
| neCVID1001 19     | 4-59  | 3-3  | 2  | 4  | DRRQSSGYSD              | 10     | 1-12  | 3  | QQANSFPFT    | 9      | -          | +     | -        |
| ne CVID 1001 50   | 4-31  | 3-16 | 1  | 4  | GLRLGDTSFYD             | 11     | 1-39  | 4  | QQSYSTPLT    | 9      | +          | +     | c        |
| ne CVID 1001 51 # | 4-34  | 5-24 | 2  | 4  | ARGGEGERDGYNEDY         | 15     | 1-5   | 1  | QQYNSYSRT    | 9      |            |       |          |
| ne CVID 1001 54   | 4-61  | 6-13 | 2  | 5  | DDSSWDYQGFDY            | 13     | 3-11  | 2  | QQRSNWPHT    | 9      | -          | +2    | -        |
| ne CVID 1001 56   | 3-74  | 2-2  | 3  | 6  | VRLIVVVPAGGMDV          | 14     | 3-15  | 5  | QQYNNWPPIT   | 10     | +          | +     | -        |
| ne CVID 1001 58   |       |      |    |    | see lamda               |        | 1-8   | 5  | QQYYSYPIT    | 9      | -          | -     | -        |
| ne CVID 1001 62 # | 4-34  | 6-19 | 3  | 4  | GGGDAVADPAPGY           | 13     | 3-11  | 5  | QQRSNWPPSIT  | 11     |            |       |          |
| ne CVID 1001 67 # |       |      |    |    | see lamda               |        | 1-39  | 4  | QQSYSTPLT    | 9      |            |       |          |
| ne CVID 1001 68   | 3-23  | 1-1  | 3  | 4  | DEGTGLLDY               | 9      | 1-5   | 1  | QQYNSYRT     | 8      | -          | -     | -        |
| ne CVID 1001 69   | 4-34  | 5-5  | 2  | 6  | GYSYGYYYGMDV            | 12     | 1-9   | 3  | QQLNSYPFT    | 9      | -          | +2    | -        |
| ne CVID 1001 73 # | 1-24  | 7-27 | 1  | 4  | GPQYSLGIY               | 10     | 1-8   | 2  | QQYYSYSWT    | 9      |            |       |          |
| ne CVID 1001 81   | 4-61  | 5-24 | 3  | 6  | GTRMATILNGMDV           | 13     | 3-20  | 3  | QQYSSSPIT    | 9      | +2         | +     | N+c      |
| ne CVID 1001 88   | 3-15  | 5-12 | 2  | 6  | DLYSGYDYGVYYYGMDV       | 18     | 2-28  | 3  | MQALQTLT     | 8      | -          | +     | c        |
| ne CVID 1001 89   | 4-4   | 6-13 | 1  | 4  | RGQQLVRDTPGDY           | 13     | 3-11  | 5  | QQRSNWPIT    | 9      | +          | -     | N        |
| ne CVID 1001 90 # | 4-34  | 6-6  | 2  | 6  | GSSTNKLRLPYSSSSYGYGMDV  | 23     | 1-8   | 1  | QQYYSYPRT    | 9      |            |       |          |
|                   | VH    | D    | RF | JH | CDR3 (aa)               | Length | Vλ    | Jλ | CDR3 (aa)    | Length | Poly       | HEp-2 | Staining |
| neCVID1001 40     | 3-53  | 4-23 | 3  | 2  | DRAVVTGGWYFDL           | 13     | 3-21  | 2  | QVWDSSSDHFVY | 12     | +2         | +     | N+c      |
| neCVID1001 42     | 4-34  | 5-24 | 3  | 4  | VMGMATTKSWWFDY          | 14     | 1-51  | 2  | GTWSSSLSAVV  | 11     | -          | -     | -        |
| neCVID1001 58     | 3-23  | 6-13 | 3  | 4  | FLAAAATY                | 8      | 2-14  | 1  | SSYTSSSTYV   | 10     | -          | -     | -        |
| neCVID1001 67     | 3-7   | 1-7  | 1  | 4  | DDPQLELGTFGY            | 12     | 2-23  | 1  | CSYAGSSTYK   | 10     | -          | +     | -        |
| neCVID1001 79     | 4-39  | /    | /  | 6  | QADGVLLGEENYYYGMDV      | 18     | 3-1   | 3  | QAWDSSTVV    | 9      | -          | +     | -        |
| neCVID1001 93     | 1-3   | 3-10 | 2  | 4  | GLEGYYGSGSYYYFDY        | 17     | 2-14  | 3  | SSYTSSSTVV   | 10     | -          | -     | -        |
| neCVID1001 94     | 3-21  | 3-9  | 2  | 6  | GNQPNYDILTGHIPSGYYYGMDV | 23     | 3-21  | 3  | QVWDSSSDRVV  | 11     | -          | +     | -        |
| neCVID1001 95     | 3-21  | 3-9  | 1  | 4  | DSGGLDFDWLSE            | 12     | 1-47  | 2  | AAWDDSLSAVV  | 11     | -          | +     | -        |
|                   | VH    | D    | RF | JH | CDR3 (aa)               | Length | V     | J  | CDR3 (aa)    | Length | Poly       | HEp-2 | Staining |
| ne CVID 1001 59   | 5-51  | 3-22 | 2  | 4  | REYYYDSSGYPLDY          | 14     |       |    |              |        |            |       |          |
| neCVID1001 61     | 4-34  | 2-2  | 3  | 4  | GVDDVVVPAAMPPIPRDFNFDY  | 21     |       |    |              |        |            |       |          |
| ne CVID 1001 74   | 4-39  | 3-3  | 1  | 5  | HDYVLRFLDLFDY           | 13     |       |    |              |        |            |       |          |
| ne CVID 1001 75   | 3-30  | 6-6  | 3  | 6  | DNHVDIAARLNYYYGMDV      | 18     |       |    |              |        |            |       |          |
| neCVID1001 92     | 3-30  | 6-19 | 3  | 6  | GIAVAGTGPYYYGMDV        | 17     |       |    |              |        |            |       |          |

RF, reading frame; #, antibody failed to be expressed

-, non-reactive; +, reactive; +2, highly reactive

c, diffuse cytoplasmic staining; A, actin staining; G, Golgi staining; M, mitochondria staining; N, nuclear staining

**Supplemental Table 13.** Repertoire and reactivity of antibodies from new emigrant B cells of CVID patient C12.

| Ig             | HEAVY  |      |    |    |                          |        | LIGHT |    |              |        | REACTIVITY |       |          |
|----------------|--------|------|----|----|--------------------------|--------|-------|----|--------------|--------|------------|-------|----------|
|                | VH     | D    | RF | JH | CDR3 (aa)                | Length | Vκ    | Jκ | CDR3 (aa)    | Length | Poly       | HEp-2 | Staining |
| neCVIDC12 03 # | 4-34   | 3-22 | 3  | 3  | FSRDLFDTMIVVSVVADDAFDI   | 23     | 1-39  | 2  | QQSYSTPYT    | 9      |            |       |          |
| neCVIDC12 05   | 1-69   | 5-5  | 2  | 6  | GGGYGPGYGM DV            | 11     | 1-39  | 2  | QQSYSTLYT    | 9      | -          | +     | -        |
| neCVIDC12 06   | 3-33   | 3-3  | 1  | 6  | DLKYGAERP LEWLSLNNYYGMDV | 22     | 3-20  | 4  | QQYGSSPPEALT | 12     | -          | -     | c        |
| neCVIDC12 09   | 1-18   | 3-3  | 3  | 6  | DWDEAGGVITIFGAISYGM DV   | 21     | 4-1   | 1  | QQYYSTRT     | 8      | -          | -     | -        |
| neCVIDC12 21   | 1-69   | 4-17 | 3  | 4  | RGAVTPILHWFDY            | 13     | 3-15  | 3  | QQYNNWPPSFT  | 11     | +          | +2    | -        |
| neCVIDC12 25   | 4-34   | 6-13 | 3  | 5  | GFQIAAASIDP              | 11     | 3-20  | 2  | QQYGSSPYT    | 9      | -          | -     | -        |
| neCVIDC12 26   | 1-3    | 3-3  | 2  | 4  | DLGGGGYSRSYYFDY          | 15     | 1-12  | 4  | QQANSFPLT    | 9      | -          | +     | N        |
| neCVIDC12 29   | 4-31   | 6-13 | 3  | 4  | EAAAAGTNY                | 9      | 1-12  | 5  | QQANSFPIT    | 9      | -          | -     | -        |
| neCVIDC12 32   | 1-69   | 3-22 | 2  | 4  | EGTLDYDSSGYDY            | 14     | 4-1   | 1  | QQYYSTPWT    | 9      | +2         | +2    | -        |
| neCVIDC12 43   | 3-30   | 6-13 | 3  | 6  | DVGAAAGTFYYGMDV          | 16     | 2-28  | 4  | MQALQTPLT    | 9      | -          | +2    | -        |
| neCVIDC12 48   | 3-53   | 6-19 | 2  | 3  | APGSGWYVGAFDI            | 13     | 1-13  | 4  | QQFNYSPLT    | 9      | -          | +     | N+c      |
| neCVIDC12 52 # | 4-31   | 3-22 | 2  | 4  | SDYYDSSGYFPPDY           | 14     | 1-17  | 1  | LQHNSYPPT    | 9      |            |       |          |
| neCVIDC12 67 # | 3-30   | 3-9  | 2  | 3  | DKAYDILTAHAFDI           | 14     | 1-5   | 1  | QQYNSYPRT    | 9      |            |       |          |
| neCVIDC12 69 # | 3-30-3 | 2-8  | 3  | 3  | DRLALVYATPNAFDI          | 16     | 1-5   | 1  | QQYNSYSPWT   | 10     |            |       |          |
| neCVIDC12 11   |        |      |    |    |                          |        | 3-20  | 4  | QQYGSSPLT    | 10     |            |       |          |
| neCVIDC12 13   |        |      |    |    |                          |        | 1-39  | 1  | QQSYSTPWG    | 9      |            |       |          |
| neCVIDC12 30   |        |      |    |    |                          |        | 3-20  | 1  | QQYGSSLWT    | 9      |            |       |          |
| neCVIDC12 38   |        |      |    |    |                          |        | 1-33  | 2  | QQYDNLPLYT   | 9      |            |       |          |
| neCVIDC12 53   |        |      |    |    |                          |        | 3-15  | 4  | QQYNNWPLT    | 9      |            |       |          |
| neCVIDC12 54   |        |      |    |    |                          |        | 3-20  | 1  | QQYGSSPWT    | 9      |            |       |          |
| neCVIDC12 55   |        |      |    |    |                          |        | 1-9   | 4  | QQLL         | 5      |            |       |          |
| neCVIDC12 56   |        |      |    |    |                          |        | 2-28  | 4  | MQALQTPLT    | 9      |            |       |          |
| neCVIDC12 65   |        |      |    |    |                          |        | 3-15  | 3  | QQYNNWLF     | 9      |            |       |          |
|                | VH     | D    | RF | JH | CDR3 (aa)                | Length | Vλ    | Jλ | CDR3 (aa)    | Length | Poly       | HEp-2 | Staining |
| neCVIDC12 02   | 4-61   | 5-5  | 2  | 5  | AGRHSYGYRS               | 10     | 3-21  | 2  | QVWDSSSDHV   | 11     | -          | -     | -        |
| neCVIDC12 07   | 4-30-2 | 3-3  | 2  | 5  | DRRGYLSWFDP              | 11     | 2-14  | 2  | SSYTSSSTPHV  | 12     | +          | +2    | N+c      |
| neCVIDC12 12   | 4-39   | 5-5  | 1  | 5  | DSRSQLWFLSWFDP           | 14     | 2-11  | 2  | CSYAGSYTYV   | 11     | +          | +     | -        |
| neCVIDC12 16   | 3-23   | 3-22 | 2  | 4  | DGSYYDSSGYSDY            | 15     | 2-14  | 2  | SSYTSSSTV    | 10     | -          | -     | -        |
| neCVIDC12 32   |        |      |    |    | see kappa                |        | 1-51  | 2  | GTWDSLSAVV   | 11     | +          | +     | -        |
| neCVIDC12 33   | 4-39   | 2-2  | 1  | 3  | VSHAGLGQLLFAFDI          | 16     | 1-44  | 2  | AAWDDSLNGHV  | 12     | -          | -     | -        |
| neCVIDC12 44   | 1-69   | 3-9  | 2  | 6  | PSGVGDILTGYYYYYYGM DV    | 21     | 1-51  | 2  | GTWDSLSGVV   | 11     | +          | -     | -        |
| neCVIDC12 47   | 4-4    | 5-12 | 2  | 4  | EGSGYDGGGEIYFDY          | 15     | 3-25  | 2  | QSADSSGTVEV  | 11     | -          | -     | -        |
| neCVIDC12 68   |        |      |    |    |                          |        | 1-40  | 1  | QSYDSSLSGRV  | 11     |            |       |          |
|                | VH     | D    | RF | JH | CDR3 (aa)                | Length | V     | J  | CDR3 (aa)    | Length | Poly       | HEp-2 | Staining |
| neCVIDC12 17   | 1-46   | 6-6  | 2  | 6  | SLRMYSSSSAWDYYYYYGM DV   | 20     |       |    |              |        |            |       |          |

RF, reading frame; #, antibody failed to be expressed

-, non-reactive; +, reactive; +2, highly reactive

c, diffuse cytoplasmic staining; A, actin staining; G, Golgi staining; M, mitochondria staining; N, nuclear staining



**Supplemental Table 14.** Repertoire and reactivity of antibodies from new emigrant B cells of CVID 218.

| Ig             | HEAVY |      |    |    |                          |        | LIGHT |    |              |        | REACTIVITY |       |          |
|----------------|-------|------|----|----|--------------------------|--------|-------|----|--------------|--------|------------|-------|----------|
|                | VH    | D    | RF | JH | CDR3 (aa)                | Length | Vk    | Jk | CDR3 (aa)    | Length | Poly       | HEp-2 | Staining |
| neCVID218 09   | 4-39  | 3-9  | 3  | 2  | DPITTYGPSVGYFDL          | 15     | 1-5   | 1  | QQYNSYPWT    | 9      | +          | +     | c        |
| neCVID218 13   | 4-31  | 3-3  | 2  | 3  | ERTDDYDFWSGYLPPDAFDI     | 20     | 3-11  | 3  | QQRSNWPRT    | 9      | -          | +     | -        |
| neCVID218 19   | 3-23  | 1-7  | 2  | 6  | DRAGYNWNKEGMDV           | 15     | 1D-13 | 3  | QQFNYPPLT    | 9      | -          | -     | -        |
| neCVID218 22   | 3-23  | 6-13 | 2  | 3  | DRGVGSSSRDADFID          | 15     | 3-15  | 1  | QQYNNWPPMT   | 10     | -          | -     | -        |
| neCVID218 23   | 59-61 | 1-26 | 1  | 5  | APLQWEVSFDP              | 11     | 3-20  | 2  | QQYGSSSLYT   | 10     | -          | +     | -        |
| neCVID218 24   | 3-33  | 6-19 | 3  | 4  | SLKGIAGAGEDY             | 12     | 1-5   | 1  | QQYNSSWT     | 8      | +          | +     | -        |
| neCVID218 25 # | 3-15  | 6-13 | 3  | 4  | GDGGIAAGYYFDY            | 14     | 3-20  | 4  | QQYGSSSPLT   | 9      |            |       |          |
| neCVID218 26   | 3-7   | 3-3  | 2  | 6  | GPLVDYDFWSGYFVRSNGYGMVDV | 24     | 3-20  | 1  | QQYGSSSLKT   | 9      | +2         | +2    | -        |
| neCVID218 31   | 3-48  | 1-26 | 2  | 4  | DGGSRYFDY                | 9      | 3-15  | 1  | QQYNNWPPWT   | 10     | -          | -     | -        |
| neCVID218 32 # | 3-48  | 3-22 | 2  | 2  | GDSSGYYYWYFDL            | 13     | 3-20  | 2  | QQYGSSPYT    | 9      |            |       |          |
| neCVID218 33   | 4-34  | 2-8  | 2  | 4  | GRTLGYCTNGVCYTPYFDY      | 19     | 1-39  | 1  | QQSYSTPRT    | 9      | +2         | +     | -        |
| neCVID218 34 # | 4-31  | 6-13 | 3  | 4  | VATPGIAAADSEY            | 13     | 1-17  | 4  | LQHNSYPPT    | 9      |            |       |          |
| neCVID218 35 # | 3-48  | 1-26 | 2  | 4  | DGGSRYFDY                | 9      | 2-29  | 1  | MQGIHLPWT    | 9      |            |       |          |
| neCVID218 36 # | 3-30  | 3-10 | 1  | 4  | DGLILWFGELSDFDY          | 15     | 2-30  | 1  | MQGTHWPPT    | 9      |            |       |          |
| neCVID218 37   | 3-23  | 3-3  | 1  | 4  | DSQWLFHDI                | 9      | 3-15  | 2  | QQYNNWHSYS   | 10     | -          | -     | c        |
| neCVID218 39 # | 3-23  | 2-2  | 2  | 6  | DLGYSSTSCYPQHYGMVDV      | 19     | 1-39  | 2  | QQSYSTPRT    | 9      |            |       |          |
| neCVID218 40   | 3-21  | 3-3  | 2  | 6  | GGAYDFWSGYPFKFLGMDV      | 20     | 2-29  | 4  | MQGIHLPWT    | 9      | +          | +     | c        |
| neCVID218 43 # | 4-34  | 6-19 | 2  | 4  | LGRDSSGWVDVY             | 12     | 3-20  | 2  | QQYGSSPLYT   | 10     |            |       |          |
| neCVID218 44   | 3-23  | 2-21 | 3  | 4  | EPAVGHIVVTAIRGYFDY       | 20     | 3-11  | 4  | QQRSNWPLT    | 9      | +          | +     | N        |
| neCVID218 48   | 3-21  | 3-10 | 2  | 4  | DPDGSYSYITLVYFDY         | 18     | 1-5   | 1  | QQYNSYRT     | 8      | -          | +     | c        |
| neCVID218 54   | 3-30  | 6-6  | 1  | 4  | DGEQLVTRGYFDY            | 13     | 3-20  | 2  | QQYGSSPPGT   | 10     | -          | -     | -        |
| neCVID218 55   | 4-59  | 3-16 | 1  | 4  | DRPGRDLGELDY             | 12     | 1-5   | 3  | QQYNSYSLIFT  | 11     | -          | +     | -        |
| neCVID218 58   | 3-30  | 6-6  | 3  | 5  | GTGAARPPGWFDP            | 14     | 2-28  | 2  | MQALQTPYT    | 9      | -          | -     | -        |
| neCVID218 63   | 4-31  | 2-21 | 2  | 4  | VRRKDEYCGGDCYSPFDY       | 18     | 1-5   | 1  | QQYNSYWT     | 8      | -          | -     | -        |
| neCVID218 65   | 3-30  | 1-26 | 3  | 4  | DPSRRVVGATPFDY           | 14     | 2-40  | 2  | MQRIEFPHT    | 9      | -          | -     | -        |
| neCVID218 67   | 3-33  | /    | /  | 3  | DGMRFGAFDI               | 10     | 3-20  | 1  | QQYGSSSWT    | 9      | +          | +     | N+c      |
| neCVID218 69 # | 4-55  | /    | /  | 6  | LRPDNNPGSPPPNYYYMDV      | 21     | 1-9   | 1  | QQLNSYPRT    | 9      |            |       |          |
| neCVID218 71 # | 3-64  | 3-22 | 2  | 6  | DSPTYYYDSSGYFSGDYGMVDV   | 21     | 2-30  | 1  | MQGTHWLWT    | 9      |            |       |          |
| neCVID218 72 # | 1-18  | 3-3  | 2  | 5  | ATYYDFWSGYTGWFDP         | 17     | 1-39  | 4  | QQSYSTPPLT   | 10     |            |       |          |
| neCVID218 73 # | 3-30  | 2-2  | 3  | 6  | DLDIVVPAANYYYGYMDV       | 20     | 3-20  | 1  | QQYGSSRET    | 9      |            |       |          |
| neCVID218 81   | 3-43  | 6-6  | 3  | 4  | DIARIAARPGHFDY           | 14     | 2-29  | 1  | MQGIHLPRT    | 9      | -          | -     | c        |
| neCVID218 85 # | 3-23  | 3-16 | 2  | 4  | DPYYDYVWGSYRYTGVGGLDY    | 22     | 2D-29 | 4  | MQSIQLPLT    | 9      |            |       |          |
| neCVID218 87 # | 3-7   | 1-1  | 3  | 3  | VVTGTTSAFDI              | 11     | 1-12  | 4  | QQANSFPLT    | 9      |            |       |          |
| neCVID218 46   |       |      |    |    |                          |        | 3-20  | 1  | QQYGSSPRT    | 9      |            |       |          |
|                | VH    | D    | RF | JH | CDR3 (aa)                | Length | Vk    | Jk | CDR3 (aa)    | Length | Poly       | HEp-2 | Staining |
| neCVID218 03 # | 4-55  | 6-13 | 1  | 6  | DARQQLDYYYYYGMDV         | 16     | 2-14  | 1  | SSYTSSSPYV   | 11     |            |       |          |
| neCVID218 08   | 59-61 | 3-9  | 2  | 3  | DLGYDILTGRPNDAFDI        | 18     | 3-25  | 2  | QSADSSGYVYV  | 10     | -          | -     | -        |
| neCVID218 16 # | 3-30  | 3-10 | 2  | 6  | DAYYYGSGSYIRPNYYYYGMDV   | 23     | 2-14  | 3  | SSYTSSSWV    | 9      |            |       |          |
| neCVID218 17 # | 4-55  | 2-15 | 2  | 4  | VGEGYCSGGSCHTTGYFDY      | 20     | 2-14  | 1  | SSYTSSSTRYV  | 12     |            |       |          |
| neCVID218 27   | 4-59  | 7-27 | 2  | 3  | RVGLLNWGSRDDAFDI         | 16     | 1-47  | 2  | AAWDDSLSGV   | 11     | -          | +     | -        |
| neCVID218 30 # | 4-55  | 6-13 | 3  | 3  | GTAADVRAFDI              | 11     | 2-23  | 1  | CSYAGSSTRV   | 10     |            |       |          |
| neCVID218 44   |       |      |    |    | see kappa                |        | 1-51  | 3  | GTWDSLSAFVW  | 12     | +          | +     | -        |
| neCVID218 52 # | 3-33  | 3-10 | 2  | 4  | DFSDNYGSFDY              | 11     | 3-21  | 1  | QVWDSSSDHSGV | 12     |            |       |          |
| neCVID218 55 # |       |      |    |    | see kappa                |        | 2-14  | 1  | SSYTSSSTLDV  | 11     |            |       |          |
| neCVID218 61   | 3-30  | 3-10 | 2  | 4  | DGGLSYGSGSYIFFDY         | 17     | 1-51  | 3  | GTWDSLSAGV   | 11     | -          | +     | N+c      |
| neCVID218 66   | 4-39  | 6-13 | 3  | 3  | QGIAAHDAFDI              | 11     | 2-8   | 1  | SSYAGSNNFYV  | 11     | -          | -     | -        |
| neCVID218 70 # | 3-53  | /    | /  | 3  | DSGGTDAFDI               | 10     | 2-8   | 1  | SSYAGSNKLGV  | 11     |            |       |          |
| neCVID218 74 # | 4-34  | /    | /  | 4  | RSLEY                    | 5      | 7-43  | 3  | LLYYGGPWV    | 9      |            |       |          |
| neCVID218 78   | 3-53  | 1-7  | 3  | 4  | DHPITGTRAFDY             | 12     | 2-14  | 1  | SSYTSSSSYV   | 10     | -          | -     | -        |
| neCVID218 88 # | 3-23  | 3-16 | 3  | 4  | DRITFGVIDY               | 11     | 1-51  | 3  | GTWDSLSAGV   | 11     |            |       |          |
| neCVID218 93   | 4-39  | 6-13 | 2  | 4  | SAAPSSWYLRPQRHPIDGYYFDY  | 24     | 2-8   | 2  | SSYAGSNNLV   | 10     | +          | +     | -        |
| neCVID218 95 # | 3-7   | 2-21 | 2  | 4  | QYCGGDCYLGRSPDRRPAIDY    | 23     | 1-40  | 1  | QSYDSSLSQGV  | 11     |            |       |          |
| neCVID218 57   |       |      |    |    |                          |        | 2-23  | 3  | CSYAGSSTYVW  | 11     |            |       |          |
| neCVID218 76   |       |      |    |    |                          |        | 1-40  | 1  | QSYDSSLSV    | 9      |            |       |          |
|                | VH    | D    | RF | JH | CDR3 (aa)                | Length | V     | J  | CDR3 (aa)    | Length | Poly       | HEp-2 | Staining |
| neCVID218 64   | 3-30  | 2-2  | 2  | 4  | DVCSSTSCYTFDY            | 13     |       |    |              |        |            |       |          |
| neCVID218 73   |       |      |    |    | see kappa                |        |       |    |              |        |            |       |          |

RF, reading frame; #, antibody failed to be expressed

-, non-reactive; +, reactive; +2, highly reactive

c, diffuse cytoplasmic staining; A, actin staining; G, Golgi staining; M, mitochondria staining; N, nuclear staining

**Supplemental Table 15.** Repertoire and reactivity of antibodies from new emigrant B cells of CVID patient 251.

| Ig             | HEAVY |      |    |    |                         |        | LIGHT |    |              |        | REACTIVITY |       |          |
|----------------|-------|------|----|----|-------------------------|--------|-------|----|--------------|--------|------------|-------|----------|
|                | VH    | D    | RF | JH | CDR3 (aa)               | Length | Vκ    | Jκ | CDR3 (aa)    | Length | Poly       | HEp-2 | Staining |
| neCVID251 15   | 1-2   | 3-22 | 2  | 3  | AGGSGYEFGAFDI           | 13     | 1-39  | 2  | QQSYSTSCS    | 9      | -          | +     | -        |
| neCVID251 16   | 1-46  | 3-10 | 2  | 6  | DLISGTQYGMDV            | 12     | 1-39  | 1  | QQSYSTPPT    | 9      | -          | -     | -        |
| neCVID251 17   | 3-64  | 5-24 | 1  | 4  | GWLQGSC                 | 7      | 1-39  | 4  | QQSYSTPLT    | 9      | -          | -     | -        |
| neCVID251 21   | 3-23  | /    | /  | 6  | DPEYYYGMDV              | 10     | 3-11  | 2  | QQRSNWPLYT   | 10     | -          | -     | -        |
| neCVID251 24   | 1-2   | 4-17 | 3  | 5  | EGVPTVTTVTKGGWFDP       | 17     | 1-39  | 4  | QQSYSTPQLT   | 10     | -          | -     | -        |
| neCVID251 27   | 1-46  | 3-22 | 3  | 4  | DITMIVGYFDY             | 13     | 3-11  | 4  | QQRSNWPLT    | 10     | -          | -     | -        |
| neCVID251 56   | 4-39  | 3-22 | 2  | 4  | GYYYDSSGYPLWDY          | 15     | 1-5   | 1  | QQYNSYSPA    | 9      | -          | -     | -        |
| neCVID251 59   | 1-46  |      |    | 4  | DFRATYFDY               | 9      | 3-15  | 1  | QQYNNWPRT    | 9      | -          | -     | -        |
| neCVID251 60   | 4-31  | 3-22 | 2  | 4  | NWFGGYYDSSGYLGSGRNDY    | 23     | 1-39  | 3  | QQSYSTPLFT   | 11     | +          | +     | -        |
| neCVID251 65 # | 4-34  |      |    | 4  | GNGAPLFDY               | 9      | 4-1   | 4  | QQYYSTPPT    | 9      |            |       |          |
| neCVID251 68 # | 4-39  | 2-15 | 2  | 5  | REGQGGYCSGGSCYGLDP      | 19     | 4-1   | 4  | QQYYSTPQLT   | 10     |            |       |          |
| neCVID251 74 # | 4-34  | 3-22 | 2  | 6  | DLYYYDSSGYGYGMDV        | 16     | 1-12  | 1  | QQANSFPWT    | 9      |            |       |          |
| neCVID251 83   | 4-34  | 3-10 | 1  | 5  | GGEVSPFDP               | 9      | 3-11  | 1  | QQRSNWPPWT   | 10     | -          | -     | -        |
| neCVID251 88   | 1-18  | 2-15 | 2  | 4  | DRYCSGGSCYDY            | 12     | 1-39  | 1  | QQSYSTPRT    | 9      | +          | +     | c        |
| neCVID251 92   | 3-21  | 6-13 | 2  | 2  | RSSWSYWFDL              | 11     | 1D-8  | 1  | QQYYSFPT     | 9      | +          | +     | -        |
| neCVID251 94 # | 3-33  | 5-24 | 2  | 2  | DEGGRDGYNLLHWYFDL       | 17     | 1-5   | 1  | QQYNSYPWT    | 9      |            |       |          |
| neCVID251 75   |       |      |    |    |                         |        | 4-1   | 1  | QQYYSTPWT    | 9      |            |       |          |
| neCVID251 78   |       |      |    |    |                         |        | 3-15  | 5  | QQYNNWPS     | 8      |            |       |          |
| neCVID251 85   |       |      |    |    |                         |        | 2-28  | 1  | MQALQTPRT    | 9      | +          | +     | -        |
| neCVID251 95   |       |      |    |    |                         |        | 3-20  | 2  | QQYGSSPPYT   | 10     |            |       |          |
|                | VH    | D    | RF | JH | CDR3 (aa)               | Length | Vλ    | Jλ | CDR3 (aa)    | Length | Poly       | HEp-2 | Staining |
| neCVID251 04   | 1-2   | 3-22 | 2  | 4  | NYDSSGYLPCWNY           | 14     | 2-23  | 2  | CSYAGSGAV    | 9      | +          | +     | -        |
| neCVID251 08   | 1-3   | 3-10 | 3  | 6  | AGTMVRGVIPTPYGMDV       | 17     | 2-23  | 1  | CSYAGSSTYV   | 10     | +          | +     | -        |
| neCVID251 11   | 4-59  | /    | /  | 5  | RPPAGPFDP               | 9      | 3-21  | 1  | QVWDSDDHLYV  | 12     | -          | -     | c        |
| neCVID251 15   |       |      |    |    | see kappa               |        | 3-25  | 1  | QSADSSGTHYV  | 11     | -          | -     | -        |
| neCVID251 22   | 1-18  | 2-15 | 2  | 6  | DPHSYCGGDCYNQLHYYYYGMDV | 24     | 1-40  | 1  | QSYDSSLGIFYV | 12     | -          | -     | -        |
| neCVID251 28   | 3-9   | 6-19 | 2  | 4  | DPYSGYSSGWSIGYFDY       | 17     | 1-51  | 2  | GTWDSLSVPV   | 11     | -          | -     | -        |
| neCVID251 31   | 3-7   | 6-13 | 3  | 4  | DPAAAGRRDY              | 10     | 2-14  | 1  | SSYTSSSRV    | 9      | -          | -     | -        |
| neCVID251 36   | 4-61  | 1-1  | 2  | 6  | EGPNWNDEREMVYYGMDV      | 20     | 1-36  | 3  | AAWDDSLNGLV  | 11     | -          | -     | -        |
| neCVID251 38   | 3-21  | 3-3  | 2  | 5  | LVDYDFWSPGFDP           | 14     | 3-21  | 2  | QVWDSDDRVV   | 11     | +          | +     | -        |
| neCVID251 41 # | 4-59  | 2-15 | 2  | 6  | GNCSSGSCYYYYGMDV        | 16     | 3-25  | 1  | QSADSSGTYV   | 10     |            |       |          |
| neCVID251 47   | 4-39  | 2-15 | 2  | 5  | YCSGGSCNWFDP            | 12     | 3-27  | 3  | YSAADNNWV    | 9      | -          | -     | -        |
| neCVID251 67   | 1-46  | 3-22 | 2  | 5  | EGDSSGSNWFDP            | 12     | 2-14  | 1  | SSYTSSSTPYV  | 11     | -          | -     | -        |
| neCVID251 83 # |       |      |    |    | see kappa               |        | 2-14  | 2  | SSYTSSSTLWV  | 11     |            |       |          |
| neCVID251 71   |       |      |    |    |                         |        | 2-11  | 3  | CSYAGSYIWW   | 10     |            |       |          |
| neCVID251 79   |       |      |    |    |                         |        | 2-23  | 3  | CSYAGSSTYV   | 10     |            |       |          |
|                | VH    | D    | RF | JH | CDR3 (aa)               | Length | V     | J  | CDR3 (aa)    | Length | Poly       | HEp-2 | Staining |
| neCVID251 43   | 4-34  |      |    | 4  | GGVRLLEGSFDY            | 12     |       |    |              |        |            |       |          |

RF, reading frame; #, antibody failed to be expressed

-, non-reactive; +, reactive; +2, highly reactive

c, diffuse cytoplasmic staining; A, actin staining; G, Golgi staining; M, mitochondria staining; N, nuclear staining

**Supplemental Table 16.** Repertoire and reactivity of antibodies from new emigrant B cells of CVID patient 170.

| Ig             | HEAVY |      |    |    |                        |        | LIGHT          |                |               |        | REACTIVITY |       |          |
|----------------|-------|------|----|----|------------------------|--------|----------------|----------------|---------------|--------|------------|-------|----------|
|                | VH    | D    | RF | JH | CDR3 (aa)              | Length | V <sub>k</sub> | J <sub>k</sub> | CDR3 (aa)     | Length | Poly       | HEp-2 | Staining |
| neCVID170 02   | 4-34  | 6-13 | 1  | 5  | ARGVGGSGQQLVGFDP       | 17     | 3-11           | 4              | QLGIT         | 5      | -          | +     | -        |
| neCVID170 03 # | 5-51  | 1-26 | 1  | 6  | ARTPSWELPYYYYGMDV      | 17     | 3-15           | 1              | QQYNNWPLWT    | 10     |            |       |          |
| neCVID170 05 # | 1-69  | 6-13 | 1  | 4  | ARTGEQQYPSGDFDY        | 15     | 2-24           | 1              | MQATQFPWT     | 9      |            |       |          |
|                |       | 7-27 | 3  |    |                        |        |                |                |               |        |            |       |          |
| neCVID170 06   | 3-23  | 6-6  | 2  | 1  | AKDLQDSSSLTDFQH        | 16     | 2-30           | 4              | MQGTHWPLT     | 9      | -          | -     | -        |
| neCVID170 07   | 3-15  | 6-19 | 3  | 6  | TTYVRIAVAGTPGHYYYYGMDV | 23     | 2-28           | 3              | MQALQTPFT     | 9      | -          | +     | -        |
| neCVID170 08   | 4-39  | 3-10 | 1  | 4  | ARYVLLWFGESLEYFDY      | 17     | 2-24           | 1              | MQATQFPWT     | 9      | -          | -     | -        |
| neCVID170 10   | 4-34  | 6-6  | 1  | 6  | ARSRELARYYYGMDV        | 15     | 1-12           | 4              | QQANSFPPT     | 9      | -          | -     | -        |
| neCVID170 13   | 3-23  | 1-26 | 2  | 4  | AKSGSYYGPDY            | 12     | 1-5            | 1              | QQYNSYST      | 8      | -          | -     | -        |
| neCVID170 15 # | 1-18  | 3-3  | 2  | 6  | ARDIYYDFWSGQERAYYYGMDV | 23     | 3-20           | 1              | QQYGSSPPRT    | 10     |            |       |          |
| neCVID170 16   | 4-34  | 3-9  | 2  | 4  | ARCAPADNVTYDILTGHTLDY  | 22     | 3-20           | 1              | QQYGSSPRT     | 9      | -          | -     | -        |
| neCVID170 17   | 3-7   | 3-10 | 1  | 6  | AAIFREFPWDGMDV         | 14     | 1-17           | 1              | LQHNSYPWT     | 9      | -          | +     | N+c      |
| neCVID170 18   | 3-11  | 1-26 | 2  | 4  | ARHQAPSGSYHNDY         | 14     | 3-20           | 1              | QQYGSSPPTWT   | 11     | -          | -     | -        |
| neCVID170 19   | 3-74  | 6-19 | 3  | 6  | ARGIAVAGYYYGMDV        | 17     | 2-28           | 2              | MQALQTPGT     | 9      | -          | -     | -        |
| neCVID170 20   | 1-2   | 3-22 | 3  | 4  | ARSMIVHFLSDY           | 12     | 2-28           | 1              | MQALQTPYS     | 9      | -          | -     | -        |
| neCVID170 23   | 3-23  | 4-17 | 2  | 4  | ANAKTFDYGDWPWDY        | 15     | 1-17           | 1              | LQHNSYPPT     | 9      | -          | -     | -        |
| neCVID170 24   | 4-34  | 3-3  | 2  | 2  | ARMTYYDFWSGYLHWYFDL    | 19     | 3-11           | 5              | QQRSNWPPLT    | 10     | +          | +     | N+c      |
| neCVID170 27   | 1-3   | 1-26 | 3  | 4  | GRVGATMPPGY            | 11     | 3-15           | 2              | QQYNNWPPYT    | 10     | +          | +     | N        |
| neCVID170 30   | 3-13  | 6-13 | 2  | 2  | GQASSWYVRLNEWYFDL      | 18     | 3-20           | 4              | QQYGSSPGLT    | 10     | +          | +     | N+c      |
| neCVID170 33 # | 3-11  | /    | /  | 4  | AREFSGSLGDFDY          | 14     | 2D-29          | 4              | MQSIQLPLT     | 9      |            |       |          |
| neCVID170 29   |       |      |    |    |                        |        | 3-20           | 1              | QQYGSSPET     | 9      |            |       |          |
|                | VH    | D    | RF | JH | CDR3 (aa)              | Length | V <sub>k</sub> | J <sub>k</sub> | CDR3 (aa)     | Length | Poly       | HEp-2 | Staining |
| neCVID170 09   | 1-3   | 4-17 | 2  | 5  | ARDYGDSREGWFDP         | 14     | 3-21           | 3              | QVWDSSTVPL    | 10     | -          | -     | -        |
| neCVID170 12   | 3-7   | 6-13 | 1  | 6  | ARDAGPGQLEDYGMDV       | 17     | 3-1            | 2              | QAWDSSTVW     | 9      | -          | -     | -        |
| neCVID170 14   | 3-48  | 2-15 | 2  | 4  | ARDLGYCSGGSCYGGFDY     | 18     | 3-9            | 2              | QVWDSSTVW     | 9      | -          | -     | -        |
| neCVID170 21   | 7-4   | /    | /  | 4  | DMGLPPPAIDY            | 11     | 7-43           | 3              | LLYGGAAQV     | 9      | -          | +     | N        |
| neCVID170 22   | 4-39  | 3-22 | 2  | 4  | HDYPYYFDY              | 10     | 1-40           | 2              | QSYDSSLGCVV   | 11     | -          | -     | -        |
| neCVID170 26   | 3-9   | 2-15 | 2  | 5  | GYCSGGSCYGFDP          | 13     | 2-8            | 1              | SSYAGSNVCV    | 10     | -          | -     | -        |
| neCVID170 28   | 3-21  | 5-12 | 2  | 6  | DRPDDSGYDFDYGGMDV      | 18     | 1-51           | 3              | GTWDSLSAGV    | 11     | -          | -     | -        |
| neCVID170 32   | 4-34  | 3-10 | 2  | 5  | GDMNYGSGSAMGS          | 14     | 2-23           | 2              | CSYAGSSTYVW   | 11     | -          | +     | N+c      |
| neCVID170 01   |       |      |    |    |                        |        | 3-25           | 2              | QSADSSGTYGDVV | 13     |            |       |          |
| neCVID170 04   |       |      |    |    |                        |        | 1-44           | 1              | AAWDDSLNGPDVY | 13     |            |       |          |

RF, reading frame; #, antibody failed to be expressed

-, non-reactive; +, reactive; +2, highly reactive

c, diffuse cytoplasmic staining; A, actin staining; G, Golgi staining; M, mitochondria staining; N, nuclear staining

**Supplemental Table 17.** Repertoire and reactivity of antibodies from new emigrant B cells of CVID patient 124.

| Ig             | HEAVY |      |    |    |                            |        | LIGHT |    |             |        | REACTIVITY |       |          |
|----------------|-------|------|----|----|----------------------------|--------|-------|----|-------------|--------|------------|-------|----------|
|                | VH    | D    | RF | JH | CDR3 (aa)                  | Length | Vκ    | Jκ | CDR3 (aa)   | Length | Poly       | HEp-2 | Staining |
| neCVID124 06   | 3-9   | 2-2  | 2  | 3  | AKDMRYALGYCSSTSLWGCGAFDI   | 25     | 3-20  | 1  | QQYGSSLT    | 8      | +          | +     | -        |
| neCVID124 14   | 3-23  | 6-6  | 2  | 4  | AKDGRSSSSVGPY              | 13     | 1-33  | 1  | QQYDNLPR    | 9      | -          | -     | -        |
| neCVID124 16   | 3-30  | 4-17 | 2  | 4  | ARDAGDYGDYSSCGDY           | 16     | 1-5   | 4  | QQYNSYPLT   | 9      | -          | -     | -        |
| neCVID124 17   | 3-23  | 3-10 | 1  | 4  | HTAFRRFGELRYFDY            | 16     | 1-33  | 4  | QQYDNLQWLT  | 11     | +          | -     | -        |
| neCVID124 19   | 1-18  | /    | /  | 5  | ARWWWSSGWFD                | 12     | 1-33  | 2  | QQYDNLMT    | 9      | -          | -     | -        |
| neCVID124 20   | 3-30  | 3-3  | 2  | 6  | AKDPLAFWGSFMDV             | 15     | 3-11  | 4  | QQRSNWPPALT | 11     | +          | +     | N+c      |
| neCVID124 24   | 1-8   | 6-13 | 2  | 5  | ARGGYSSQT                  | 9      | 1-39  | 2  | QQSYSTPYT   | 9      | -          | -     | -        |
| neCVID124 28 # | 5-51  | 4-17 |    | 2  | ARLQGDYDPWYFDL             | 14     | 1-33  | 4  | QQYDNLPP    | 8      |            |       |          |
| neCVID124 30   | 4-31  | 3-22 | 2  | 4  | ARSPRSGYDSSGPLQQVEYFDY     | 23     | 2-29  | 2  | MQGILGCT    | 8      | +          | -     | -        |
| neCVID124 31   | 3-30  | 2-8  | 3  | 3  | ASLVLMYAIRAHDAFDI          | 18     | 2-28  | 1  | MQALQTPWT   | 9      | +2         | +     | N+c      |
| neCVID124 32   | 3-15  | 3-10 | 1  | 5  | TTDFMVRGVIGWFD             | 15     | 2-28  | 2  | MQALQTPRT   | 9      | +          | +     | N+c      |
| neCVID124 35   | 4-28  | 7-27 | 2  | 4  | ASLKNWGRTVSFDY             | 14     | 1-33  | 4  | QQYDNLQPT   | 9      | -          | +     | -        |
| neCVID124 38   | 4-34  | 1-26 | 2  | 4  | ATLPTTLSSPGVIGGSVDY        | 20     | 3-20  | 1  | QQYGSSPRT   | 9      | +          | +     | -        |
| neCVID124 42   | 5-51  | 3-22 | 2  | 4  | ARTNGCQLRDYDSSGYDY         | 19     | 1-33  | 5  | QQYDNLPT    | 9      | -          | +     | N        |
| neCVID124 50 # | 3-23  | 3-22 | 2  | 4  | AKGRVDLYDSSGSFVYFGRPK      | 23     | 1-33  | 4  | QQYDNLSTLT  | 11     |            |       |          |
| neCVID124 51   | 3-74  | 3-22 | 2  | 4  | ARMGPPYYDSSGYPESY          | 18     | 2D-29 | 4  | MQSIQLPLT   | 9      | -          | +     | -        |
| neCVID124 59   | 4-59  | 3-3  | 3  | 6  | ARSPTIFGVVSGMDV            | 15     | 2-28  | 1  | MQALQTPWT   | 9      | -          | -     | -        |
| neCVID124 61   | 3-7   | 4-17 | 2  | 6  | ASGNTVSDFSYGMDV            | 15     | 1-39  | 3  | QQSYSTLFT   | 9      | -          | -     | -        |
| neCVID124 67   | 1-3   | 1-26 | 2  | 6  | AIPVVGATPGWEHYGMDV         | 19     | 1-39  | 2  | QQSYSTPYT   | 9      | -          | +     | -        |
| neCVID124 68   | 3-30  | 6-13 | 3  | 4  | ARDCGISRIAAQGY             | 15     | 1-8   | 1  | QQYNSYPT    | 9      | +2         | -     | -        |
| neCVID124 69   | 4-34  | 6-13 | 2  | 4  | ARGSGYSSSWHTSYFDY          | 17     | 3-20  | 1  | QQYGSSPRT   | 9      | -          | +     | -        |
| neCVID124 71   | 1-46  | /    | /  | 2  | ARGPLDKVRPIDVRLWYFDL       | 21     | 1-5   | 1  | QQYNSYST    | 8      | +          | -     | -        |
| neCVID124 79   | 3-30  | 3-10 | 2  | 6  | AKDLLLVGFYYYYGMDV          | 17     | 2-28  | 2  | MQALQTP     | 8      | +          | -     | -        |
| neCVID124 84 # | 1-46  | 3-10 | 1  | 5  | ARDFGAIWFGDFNWFD           | 17     | 1-5   | 1  | QQYNSYST    | 8      |            |       |          |
| neCVID124 86   | 3-21  | 3-3  | 1  | 4  | ARDDAIRFLEWLLSPYFDY        | 19     | 3-15  | 1  | QQYNNWPRT   | 9      | +          | +     | N+c      |
| neCVID124 92   | 3-30  | 3-10 | 1  | 4  | AKDVGEAYYFDY               | 12     | 2D-29 | 4  | MQSIQLPLT   | 9      | -          | -     | -        |
| neCVID124 93   | 3-33  | 5-12 | 1  | 2  | ARGGGLVWLRFEWYFDL          | 20     | 3-15  | 5  | QQYNNWPPAT  | 10     | +          | +     | N+c      |
| neCVID124 94 # | 1-18  | 3-22 | 3  | 3  | ARDEDITMIVNAFDI            | 15     | 3-11  | 4  | QQRSNWPS    | 8      |            |       |          |
| neCVID124 95 # | 3-11  | 6-19 | 3  | 6  | ARQAAVAGPGEIYYYYGMDV       | 21     | 2-28  | 1  | MQALQLWT    | 9      |            |       |          |
| neCVID124 96   | 3-7   | 5-5  | 2  | 6  | ARDKFGYSRYYYYYGMDV         | 20     | 1-9   | 4  | QQLNRF      | 6      | -          | +     | N+c      |
| neCVID124 73   |       |      |    |    |                            |        | 2-28  | 1  | MQALQTPWT   | 9      |            |       |          |
|                | VH    | D    | RF | JH | CDR3 (aa)                  | Length | Vλ    | Jλ | CDR3 (aa)   | Length | Poly       | HEp-2 | Staining |
| neCVID124 33   | 4-28  | 3-3  | 3  | 4  | ARITLLFGVVIIFDY            | 15     | 3-21  | 2  | QVWDSSSDHVV | 11     | -          | -     | -        |
|                | VH    | D    | RF | JH | CDR3 (aa)                  | Length | V     | J  | CDR3 (aa)   | Length | Poly       | HEp-2 | Staining |
| neCVID124 15   | 3-73  | 2-2  | 2  | 6  | TSFIMSIGYCSSTSCYGANYYYGMDV | 27     |       |    |             |        |            |       |          |
| neCVID124 70   | 3-23  | 5-12 | 2  | 4  | AKDLGGYSGYEKFDY            | 15     |       |    |             |        |            |       |          |

RF, reading frame; #, antibody failed to be expressed

-, non-reactive; +, reactive; +2, highly reactive

c, diffuse cytoplasmic staining; A, actin staining; G, Golgi staining; M, mitochondria staining; N, nuclear staining

**Supplemental Table 18.** Repertoire and reactivity of antibodies from new emigrant B cells of CVID patient 332.

| Ig           | HEAVY |      |    |    |                           |        | LIGHT          |                |              |        | REACTIVITY |       |          |
|--------------|-------|------|----|----|---------------------------|--------|----------------|----------------|--------------|--------|------------|-------|----------|
|              | VH    | D    | RF | JH | CDR3 (aa)                 | Length | V <sub>κ</sub> | J <sub>κ</sub> | CDR3 (aa)    | Length | Poly       | HEp-2 | Staining |
| neCVID332 07 | 4-34  |      |    | 4  | ARGRPGEVYFDY              | 12     | 3-20           | 1              | QQYGSSPWT    | 9      | -          | -     | -        |
| neCVID332 23 | 4-34  | 1-26 | 3  | 4  | ARGNIVGATDYFDY            | 14     | 3-20           | 1              | QQYGSSPPT    | 9      | -          | -     | -        |
| neCVID332 30 | 1-69  | 1-26 | 1  | 3  | AREWELLSRAFDI             | 13     | 1-39           | 1              | QQSYRTAWT    | 9      | +          | +     | -        |
| neCVID332 40 | 4-34  | 6-6  | 2  | 4  | ARGPSEYSSSSGGFFDY         | 18     | 3-11           | 2              | QQRSNWPPRGFT | 12     | +          | +     | -        |
| neCVID332 43 | 4-34  | 2-2  | 2  | 4  | ARGGPWGYCSTSCYATGSKYSSFDY | 27     | 3-20           | 1              | QQYGSSPRT    | 9      | +          | +     | -        |
| neCVID332 45 | 3-23  | 2-15 | 3  | 4  | AKDLRDVVVVAATAFDY         | 18     | 3-20           | 4              | QQYGSSPLT    | 9      | -          | -     | -        |
| neCVID332 46 | 4-34  | 3-22 | 2  | 4  | ARGRIFGGSSGYFDY           | 17     | 4-1            | 1              | QQYYSTPRT    | 9      | +          | -     | -        |
| neCVID332 50 | 4-34  | 6-13 | 2  | 4  | ASSSSWYFLAY               | 11     | 1-5            | 2              | QQYNSYSYT    | 9      | -          | -     | -        |
| neCVID332 51 | 3-33  | 6-19 | 2  | 4  | ATASSGWNKPFDY             | 13     | 3-11           | 2              | QQRSNWPPEYT  | 11     | +          | +     | N, c     |
| neCVID332 57 | 4-34  | 5-5  | 2  | 4  | ASRGGGYSYGDIAAAGTFDY      | 20     | 3-20           | 2              | QQYGSSPYT    | 9      | -          | -     | -        |
|              |       | 6-13 | 3  |    |                           |        |                |                |              |        |            |       |          |
| neCVID332 62 | 4-34  | 4-17 | 3  | 4  | ARRDVTGLPFDY              | 13     | 3-20           | 4              | QQYGSSPDLT   | 10     | -          | -     | -        |
| neCVID332 70 | 4-34  | 3-10 | 2  | 4  | ARGSGSGSLAFFDY            | 14     | 4-1            | 4              | QQYYSTPPT    | 9      | -          | -     | -        |
| neCVID332 75 | 4-34  |      |    | 6  | ARGSTRGYYYGMDV            | 15     | 4-1            | 1              | QQYYSTPRT    | 9      | -          | -     | -        |
| neCVID332 77 | 3-23  | 6-6  | 3  | 3  | AKVGPSSIAAHGI             | 13     | 1-5            | 2              | QQYNSYPYT    | 9      | +          | -     | -        |
| neCVID332 82 | 4-34  |      |    | 4  | ASQRGRMYLFDY              | 13     | 3-20           | 4              | QQYGSSGT     | 8      | -          | -     | -        |
| neCVID332 83 | 1-69  | 4-17 | 3  | 4  | ARGTRWGVTTY               | 11     | 3-20           | 1              | QQYGSSPQT    | 9      | +          | +     | -        |
| neCVID332 86 | 3-33  | 6-13 | 2  | 6  | ARKMSSWHYYYYGMDV          | 17     | 3-20           | 2              | QQYGSSPYT    | 9      | +          | +     | N+c      |
| neCVID332 91 | 4-34  | 2-15 | 2  | 5  | ARGRGYCSGGSCYGTNWFDP      | 21     | 1-8            | 4              | QQYYSYPLT    | 9      | +          | +     | N+c      |
| neCVID332 94 | 4-34  | 6-19 | 3  | 4  | ARREAVAEYFDY              | 13     | 3-20           | 1              | QQYGSSRGT    | 9      | -          | -     | -        |
| neCVID332 95 | 4-34  | 2-8  | 2  | 4  | AGAAVGDTNGVCYYTGYYFDY     | 23     | 3-20           | 1              | QQYGSSPGT    | 9      | -          | +     | -        |
| neCVID332 01 |       |      |    |    |                           |        | 3-20           | 1              | QQYGSSPQT    | 9      |            |       |          |
| neCVID332 02 |       |      |    |    |                           |        | 1-5            | 1              | QQYNSYSQT    | 9      |            |       |          |
| neCVID332 10 |       |      |    |    |                           |        | 3-11           | 5              | QQRSNWPPIT   | 10     |            |       |          |
| neCVID332 11 |       |      |    |    |                           |        | 3-11           | 4              | QQRSNWPT     | 8      |            |       |          |
| neCVID332 14 |       |      |    |    |                           |        | 4-1            | 1              | QQYYSTPPWT   | 10     |            |       |          |
| neCVID332 24 |       |      |    |    |                           |        | 3-20           | 1              | QQYGSSPPT    | 9      |            |       |          |
| neCVID332 29 |       |      |    |    |                           |        | 4-1            | 1              | QQYYSTPRT    | 9      |            |       |          |
| neCVID332 35 |       |      |    |    |                           |        | 3-20           | 2              | QQYGSSSYT    | 9      |            |       |          |
| neCVID332 49 |       |      |    |    |                           |        | 1-5            | 2              | QQYNSRT      | 7      |            |       |          |
| neCVID332 58 |       |      |    |    |                           |        | 1-5            | 1              | QQYNSYPWT    | 9      |            |       |          |
| neCVID332 65 |       |      |    |    |                           |        | 1-13           | 4              | QQFNYSYPLT   | 9      |            |       |          |
| neCVID332 67 |       |      |    |    |                           |        | 4-1            | 1              | QQYYSTPQT    | 9      |            |       |          |
| neCVID332 68 |       |      |    |    |                           |        | 3-11           | 1              | QQRSNWPRT    | 9      |            |       |          |
| neCVID332 69 |       |      |    |    |                           |        | 1-39           | 2              | QQSYSTPYT    | 9      |            |       |          |
| neCVID332 72 |       |      |    |    |                           |        | 1-5            | 1              | QQYNSYSRT    | 9      |            |       |          |
| neCVID332 80 |       |      |    |    |                           |        | 1-39           | 4              | QQSYSTPLT    | 9      |            |       |          |
|              | VH    | D    | RF | JH | CDR3 (aa)                 | Length | V <sub>λ</sub> | J <sub>λ</sub> | CDR3 (aa)    | Length | Poly       | HEp-2 | Staining |
| neCVID332 15 | 4-61  |      |    | 4  | ASGSYTPSDY                | 10     | 2-23           | 1              | CSYAGSSTFDYV | 12     | -          | -     | -        |
| neCVID332 37 | 4-4   | 3-22 | 2  | 5  | ARGGGYDSSGYFWFDP          | 17     | 2-14           | 1              | SSYSSSTPYV   | 11     | -          | -     | -        |
| neCVID332 41 | 3-33  | 5-12 | 2  | 6  | AREDYDSQYYYYGMDV          | 17     | 2-23           | 2              | CSYAGSSVV    | 9      | -          | +     | N+c      |
| neCVID332 42 | 4-34  | 4-17 | 3  | 4  | ATLSRTTVTPPFDY            | 14     | 2-11           | 3              | CSYAGSWV     | 8      | +          | -     | -        |
| neCVID332 48 | 4-31  | 2-15 | 2  | 3  | ARGGHCSSGSCIDAFDI         | 17     | 1-44           | 3              | AAWDDSLNGSWV | 12     | -          | -     | -        |
| neCVID332 52 | 5-51  | 5-5  | 2  | 4  | ARRVVGYSGPPLNYFDY         | 18     | 1-51           | 3              | GTWDSLSAGV   | 11     | +          | +     | -        |
| neCVID332 59 | 4-34  | 6-13 | 1  | 6  | ARGLQQRGGMDV              | 12     | 2-23           | 2              | CSYAGSSIVV   | 10     | -          | -     | -        |
| neCVID332 62 |       |      |    |    | see kappa                 |        | 2-23           | 3              | CSYAGSSTFNWV | 12     | -          | +     | -        |
| neCVID332 71 | 4-34  | 4-17 | 3  | 6  | ARSRVTNRRGRYGMV           | 16     | 1-51           | 1              | GTWDSLSAYV   | 11     | +          | -     | N+c      |
|              | VH    | D    | RF | JH | CDR3 (aa)                 | Length | V              | J              | CDR3 (aa)    | Length | Poly       | HEp-2 | Staining |
| neCVID332 44 | 1-18  | 3-22 | 2  | 6  | ARDYDSSGYEFDNYYYYGMDV     | 21     |                |                |              |        |            |       |          |

RF, reading frame; #, antibody failed to be expressed

-, non-reactive; +, reactive; +2, highly reactive

c, diffuse cytoplasmic staining; A, actin staining; G, Golgi staining; M, mitochondria staining; N, nuclear staining

**Supplemental Table 19.** Repertoire and reactivity of antibodies from mature naïve B cells of healthy donor 29.

| Ig            | HEAVY |      |    |    |                            |        | LIGHT |    |              |        | REACTIVITY |       |          |
|---------------|-------|------|----|----|----------------------------|--------|-------|----|--------------|--------|------------|-------|----------|
|               | VH    | D    | RF | JH | CDR3(aa)                   | Length | Vk    | Jk | CDR3(aa)     | Length | Poly       | HEp-2 | Staining |
| mnHD29 49.1   | 4-59  | 5-5  | 2  | 4  | DTVSYGLDY                  | 9      | 3-11  | 5  | QQRST        | 5      | -          | -     | -        |
| mnHD29 58.1 # | 4-34  | 3-10 | 1  | 5  | VKRLWFGEGNWFD              | 15     | 3-15  | 1  | QQYNNWPRT    | 9      |            |       |          |
| mnHD29 59.1   | 4-34  | 6-19 | 2  | 4  | GDSSGRADVFDY               | 12     | 1-39  | 4  | QQSYSTPRT    | 9      | -          | -     | -        |
| mnHD29 64.1   | 3-9   | 3-22 | 2  | 4  | DMGYDDSSGSYFD              | 14     | 1-39  | 1  | QQSYNTPGT    | 9      | -          | -     | -        |
| mnHD29 66.1   | 3-7   | 3-10 | 2  | 4  | DMGSHYSGSYLPYFDY           | 17     | 3-11  | 4  | QQRSNWPRST   | 10     | -          | -     | -        |
| mnHD29 69.1   | 3-9   | 2-2  | 1  | 4  | GAPYQLLYGPPYFDY            | 15     | 3-20  | 1  | QQYGSSPGT    | 9      | -          | +     | -        |
| mnHD29 74.1   | 3-23  | 3-3  | 1  | 5  | DLGFLEWLIDP                | 11     | 1-8   | 2  | QQYYSYPV     | 8      | -          | +     | -        |
| mnHD29 75.1   | 3-33  | /    | /  | 5  | EPVAGTPENWFDP              | 13     | 3-11  | 4  | QQRSNWPPALT  | 11     | -          | -     | -        |
| mnHD29 76.1 # | 1-3   | /    | /  | 4  | EVQRTFDY                   | 8      | 3-20  | 4  | QQYGSSPL     | 8      |            |       |          |
| mnHD29 81.1 # | 4-61  | 5-24 | 3  | 3  | DAPKVRYLGVPGTGLDI          | 17     | 4-1   | 1  | QQYYSTPRT    | 9      |            |       |          |
| mnHD29 94.1 # | 3-21  | 1-7  | 2  | 4  | VTNWKREGGY                 | 10     | 2-28  | 1  | MQALQWTW     | 8      |            |       |          |
| mnHD29 52.2   | 3-21  | /    | /  | 6  | SVAEGAYYYGMDV              | 14     | 3-11  | 5  | QQRSNWPLT    | 9      | -          | -     | -        |
| mnHD29 60.2   | 3-66  | 1-26 | 1  | 4  | LEWELHPTAIDY               | 12     | 1-39  | 1  | QQSYSTPWT    | 9      | -          | -     | -        |
| mnHD29 63.2   | 3-23  | 3-22 | 2  | 4  | DEYYYDSSGYPGEDY            | 15     | 3-20  | 5  | QQYGSSHT     | 8      | -          | -     | -        |
| mnHD29 65.2   | 3-23  | 4-23 | 2  | 4  | DIGGNKNY                   | 8      | 3-11  | 5  | QQRSNWPRIT   | 10     | -          | +     | -        |
| mnHD29 69.2   | 3-30  | 4-4  | 3  | 6  | DFTVTIFRTDYYGMDV           | 16     | 4-1   | 4  | QQYYSTPLT    | 9      | -          | -     | -        |
| mnHD29 71.2   | 3-30  | 3-10 | 2  | 6  | DLGDGSEYYYGMDV             | 15     | 4-1   | 1  | QQYYSTPATWT  | 11     | -          | -     | -        |
| mnHD29 78.2 # | 5-51  | 3-9  | 2  | 4  | LLSHPPYFDY                 | 10     | 4-1   | 1  | QQYYSTPPWT   | 10     |            |       |          |
| mnHD29 83.2   | 3-7   | 5-24 | 2  | 4  | SARGGDGYNLPYFDY            | 16     | 4-1   | 4  | QQYYSTPH     | 8      | -          | -     | -        |
| mnHD29 86.2   | 3-23  | 3-16 | 2  | 6  | AARYTGYYDYVWGSYRYTDYYYGMDV | 26     | 1-9   | 1  | QLNSYPS      | 8      | +          | +     | c        |
| mnHD29 92.2   | 1-69  | 2-21 | 2  | 6  | GLRGAYCGGDYDYYYGMDV        | 20     | 3-15  | 4  | QQYNNWPS     | 8      | -          | +     | -        |
| mnHD29 93.2   | 3-7   | 3-3  | 2  | 5  | DFAYDFWWFDP                | 12     | 1-12  | 2  | QQANSFPYT    | 9      | -          | -     | -        |
| mnHD29 84.1   |       |      |    |    |                            |        | 1-5   | 1  | QQYNSYST     | 8      |            |       |          |
| mnHD29 49.2   |       |      |    |    |                            |        | 3-11  | 3  | QQRSNWPLT    | 9      |            |       |          |
| mnHD2951.2    |       |      |    |    |                            |        | 1-39  | 4  | QQSYSTLT     | 8      |            |       |          |
| mnHD29 55.2   |       |      |    |    |                            |        | 4-1   | 4  | QQYYSTPLT    | 9      |            |       |          |
| mnHD29 74.2   |       |      |    |    |                            |        | 3-11  | 4  | QQRSNWPLT    | 9      |            |       |          |
| mnHD29 75.2   |       |      |    |    |                            |        | 3-20  | 2  | QQYGSSPGT    | 9      |            |       |          |
| mnHD29 89.2   |       |      |    |    |                            |        | 3-11  | 4  | QQRSNWPT     | 8      |            |       |          |
| mnHD29 90.2   |       |      |    |    |                            |        | 3-20  | 1  | QQYGSSPRT    | 9      |            |       |          |
| mnHD29 96.2   |       |      |    |    |                            |        | 1-5   | 2  | QQYNSLYT     | 8      |            |       |          |
|               | VH    | D    | RF | JH | CDR3(aa)                   | Length | VI    | Jl | CDR3(aa)     | Length | Poly       | HEp-2 | Staining |
| mnHD29 70.1   | 3-9   | 3-16 | 3  | 4  | DQIPGFTFGGVMDY             | 14     | 1-44  | 3  | AAWDDDFRWW   | 10     | -          | -     | -        |
| mnHD29 71.1   | 3-9   | 3-22 | 3  | 3  | DTSTMIVEAFDI               | 12     | 2-8   | 2  | SSYAGSNIVV   | 10     | -          | -     | -        |
| mnHD29 56.2 # | 3-33  | /    | /  | 6  | IGGESYGMDV                 | 10     | 3-25  | 2  | QSADSSGTYYV  | 11     |            |       |          |
| mnHD29 61.2   | 1-8   | 4-23 | 2  | 4  | WRETDYGDY                  | 9      | 3-1   | 2  | QAWDSSTHVV   | 10     | -          | -     | -        |
| mnHD29 84.2   |       |      |    |    |                            |        | 1-44  | 3  | AAWDDSLNGWV  | 11     |            |       |          |
| mnHD29 88.2   |       |      |    |    |                            |        | 3-21  | 2  | QWWDSSSDHPHV | 13     |            |       |          |
|               | VH    | D    | RF | JH | CDR3(aa)                   | Length | VI    | Jl | CDR3(aa)     | Length | Poly       | HEp-2 | Staining |
| mnHD29 79.1   | 3-30  | 5-12 | 2  | 4  | VGSGYDWATFDY               | 12     |       |    |              |        |            |       |          |
| mnHD29 83.1   | 4-59  | 4-23 | 1  | 3  | RLRWYPPDAFDI               | 12     |       |    |              |        |            |       |          |
| mnHD29 92.1   | 3-9   | 6-19 | 2  | 6  | DMLPSPPGYSSGWYYGMDV        | 19     |       |    |              |        |            |       |          |
| mnHD29 93.1   | 4-31  | 3-16 | 2  | 5  | FYDYVWGLGGNWFDP            | 15     |       |    |              |        |            |       |          |
| mnHD29 54.2   | 1-69  | /    | /  | 4  | GLPLPDY                    | 7      |       |    |              |        |            |       |          |
| mnHD29 64.2   | 4-b   | 6-13 | 2  | 4  | WGMRSSWFIY                 | 10     |       |    |              |        |            |       |          |
| mnHD29 87.2   | 3-74  | 3-22 | 2  | 6  | GTYSYSSGYFYFYGGMDV         | 18     |       |    |              |        |            |       |          |
| mnHD29 80.2   | 3-11  | 3-22 | 2  | 4  | DLYDSSGGLGY                | 12     |       |    |              |        |            |       |          |
| mnHD29 91.2   | 7-4-1 | 2-2  | 2  | 4  | DPGTSCTSGDY                | 11     |       |    |              |        |            |       |          |
| mnHD29 95.2   | 3-30  | 6-13 | 2  | 5  | SWSHRGVPAGS                | 11     |       |    |              |        |            |       |          |

RF, reading frame; #, antibody failed to be expressed

-, non-reactive; +, reactive; +2, highly reactive

c, diffuse cytoplasmic staining; A, actin staining; G, Golgi staining; M, mitochondria staining; N, nuclear staining

**Supplemental Table 20.** Repertoire and reactivity of antibodies from mature naïve B cells of healthy donor G.II.

| Ig            | HEAVY |      |    |    |                      | LIGHT  |      |    |             |        | REACTIVITY |       |          |
|---------------|-------|------|----|----|----------------------|--------|------|----|-------------|--------|------------|-------|----------|
|               | VH    | D    | RF | JH | CDR3 (aa)            | Length | Vκ   | Jκ | CDR3 (aa)   | Length | Poly       | HEp-2 | Staining |
| mnHDG.II 02   | 3-64  | 6-19 | 2  | 4  | VSGWYGPFDY           | 10     | 1-39 | 4  | QQSYSTPLT   | 9      | -          | -     | -        |
| mnHDG.II 03 # | 3-30  | 6-13 | 3  | 4  | RIAAAGMLFDY          | 11     | 2-28 | 2  | MQALQTRWS   | 9      |            |       |          |
| mnHDG.II 05 # | 3-64  | 6-19 | 2  | 4  | VSGWYGPFDY           | 10     | 1D-8 | 4  | QQYYSFPLT   | 9      |            |       |          |
| mnHDG.II 08 # | 4-34  | 4-23 | 3  | 6  | DPAVTTLGYYYYGMDV     | 17     | 4-1  | 1  | QQYYSSTPLT  | 9      |            |       |          |
| mnHDG.II 09   | 3-30  | 3-3  | 2  | 4  | TTRDRYDFWSGYQMGY     | 16     | 1-33 | 3  | QQYDNLFFF   | 10     | -          | -     | -        |
| mnHDG.II 10   | 3-30  | 2-15 | 3  | 6  | DTHPVVFRVCMVDV       | 14     | 1-5  | 1  | QQYNSYWT    | 8      | +          | -     | -        |
| mnHDG.II 11 # | 4-4   | 3-22 | 2  | 6  | EILSSGYGAYYYYGMDV    | 18     | 4-1  | 4  | QQYYSSTPLT  | 9      |            |       |          |
| mnHDG.II 15   | 4-31  | 5-5  | 2  | 6  | DPGDSYGKGVYYYGMDV    | 17     | 3-20 | 2  | QQYGSSPMYT  | 10     | -          | +     | -        |
| mnHDG.II 17   | 3-30  | 3-22 | 2  | 4  | DSNWYYYDSSGYSAFDY    | 17     | 1-8  | 4  | QQYYSYPPLT  | 10     | -          | -     | N        |
| mnHDG.II 18   | 1-69  | 3-10 | 3  | 4  | GRRETMVRGASYFDY      | 16     | 2-28 | 2  | MQALQTPS    | 8      | -          | -     | -        |
| mnHDG.II 20   | 1-8   | 3-22 | 2  | 3  | ALTYYYDSSGYDDAFDI    | 17     | 1-39 | 4  | QQSYSTPLT   | 9      | -          | -     | -        |
| mnHDG.II 21   | 4-4   | 5-12 | 2  | 3  | YAADAFDI             | 8      | 3-20 | 2  | QQYGSSPPYS  | 10     | -          | -     | -        |
| mnHDG.II 22   | 4-39  | 3-10 | 1  | 6  | LLWFGFRLRAYGMDV      | 17     | 1-5  | 1  | QQYNSYSRE   | 9      | +2         | +     | -        |
| mnHDG.II 24   | 3-23  | 3-10 | 1  | 5  | WFGELSPNWFDP         | 13     | 3-15 | 1  | QQYNNWPRT   | 9      | -          | -     | -        |
| mnHDG.II 26 # | 1-46  | /    | /  | 5  | AATASGAAGIDP         | 12     | 3-11 | 3  | QQRSNWPL    | 8      |            |       |          |
| mnHDG.II 29   | 5-51  | 3-22 | 2  | 4  | GDSSGHIRPFDY         | 12     | 1-5  | 3  | QQYNSFPGT   | 9      | -          | -     | -        |
| mnHDG.II 30   | 4-34  | 4-23 | 3  | 6  | DPAVTTLGYYYYGMDV     | 17     | 4-1  | 2  | QQYYSPTYT   | 9      | -          | -     | -        |
| mnHDG.II 31   | 3-21  | 6-13 | 3  | 5  | DIAAAGTGTG           | 10     | 1-8  | 1  | QQYYSYPRY   | 9      | -          | -     | c        |
| mnHDG.II 32 # | 3-15  | 3-10 | 3  | 4  | TTDFRGAIFDY          | 11     | 2-30 | 2  | MQGTHWPPYS  | 11     |            |       |          |
| mnHDG.II 33 # | 3-23  | 5-5  | 2  | 6  | DEYSFGGYYYGMDV       | 14     | 1-8  | 1  | QQYYSYPG    | 11     |            |       |          |
| mnHDG.II 34   | 3-48  | 3-10 | 1  | 4  | DRFGELFPDY           | 10     | 1-39 | 2  | QQSYSTPRYS  | 11     | -          | -     | -        |
| mnHDG.II 38   | 3-30  | 3-22 | 2  | 4  | TEEDYYDSSGYHFDD      | 15     | 3-20 | 1  | QQYGSSRWT   | 11     | +2         | +2    | N        |
| mnHDG.II 39   | 4-34  | 5-12 | 2  | 6  | GAMYGGYGASYYYYGMDV   | 20     | 1-17 | 1  | LQHNSYPRY   | 11     | +          | -     | -        |
| mnHDG.II 40   |       |      |    |    |                      |        | 4-1  | 3  | QQYYSLTRT   | 11     |            |       |          |
|               | VH    | D    | RF | JH | CDR3 (aa)            | Length | Vλ   | Jλ | CDR3 (aa)   | Length | Poly       | HEp-2 | Staining |
| mnHDG.II 04   | 4-28  | /    | /  | 4  | SGVEESEYFDY          | 11     | 1-47 | 3  | AAWDDSLSLWV | 12     | -          | -     | -        |
| mnHDG.II 07   | 3-30  | 6-6  | 3  | 4  | DQIAARDALDY          | 11     | 1-44 | 3  | AAWDDSLNGWV | 12     | -          | -     | -        |
| mnHDG.II 19   | 3-30  | 3-10 | 3  | 4  | AYMVRGVDPLGY         | 12     | 2-11 | 3  | CSYAGSYTWV  | 10     | -          | -     | -        |
| mnHDG.II 26   | 1-46  | /    | /  | 5  | AATASGAAGIDP         |        | 2-11 | 3  | CSYAGSYWV   | 9      | -          | -     | -        |
| mnHDG.II 27 # | 4-34  | 3-3  | 2  | 5  | GERINYDFWSGYTYGYWFDV | 20     | 3-9  | 3  | QVWDSSTWV   | 9      |            |       |          |
| mnHDG.II 28 # | 4-59  | 2-2  | 2  | 3  | VRYCSSTSCYTDNAFDI    | 17     | 3-1  | 3  | QAWDSSTVW   | 9      |            |       |          |
| mnHDG.II 35 # | 1-2   | 2-2  | 3  | 5  | DIVVPTATNWFDP        | 14     | 1-44 | 1  | AAWDDSLNGYV | 11     |            |       |          |
| mnHDG.II 25   | VH    | D    | RF | JH | CDR3 (aa)            | Length | V    | J  | CDR3 (aa)   | Length | Poly       | HEp-2 | Staining |
|               | 4-39  | 5-12 | 2  | 4  | LGRGYSGYRNDY         | 12     |      |    |             |        |            |       |          |

RF, reading frame; #, antibody failed to be expressed

-, non-reactive; +, reactive; +2, highly reactive

c, diffuse cytoplasmic staining; A, actin staining; G, Golgi staining; M, mitochondria staining; N, nuclear staining

**Supplemental Table 21.** Repertoire and reactivity of antibodies from mature naive B cells of healthy donor E.V.

| Ig           | HEAVY |      |    |    |                      | LIGHT  |      |    |             |        | REACTIVITY |       |          |
|--------------|-------|------|----|----|----------------------|--------|------|----|-------------|--------|------------|-------|----------|
|              | VH    | D    | RF | JH | CDR3 (aa)            | Length | Vk   | Jk | CDR3 (aa)   | Length | Poly       | HEp-2 | Staining |
| mnHDE.V 49   | 5-a   | 3-9  | 1  | 3  | YFDWRGNAFDI          | 11     | 3-20 | 2  | QQYGSSPPYT  | 10     | +          | -     | -        |
| mnHDE.V 51   | 4-31  | /    | /  | 4  | AKKTTAYFDY           | 10     | 1-5  | 1  | QQYNSYSWT   | 9      | -          | +     | c        |
| mnHDE.V 58   | 1-3   | 1-7  | 2  | 6  | IGNNWKGM DV          | 10     | 1-39 | 3  | QQYSTPFT    | 9      | -          | -     | -        |
| mnHDE.V 60   | 4-59  | /    | /  | 4  | GRSADFY              | 8      | 1-39 | 1  | QQYSTPRT    | 9      | -          | -     | -        |
| mnHDE.V 61   | 4-31  | 4-17 | 2  | 4  | FMPGDYDWEFYYFDY      | 16     | 3-20 | 2  | QQYGSSLYT   | 9      | -          | -     | -        |
| mnHDE.V 62   | 3-73  | 1-26 | 2  | 6  | RGGSSLLYGM DV        | 13     | 3-20 | 5  | QQYGSSPITFD | 9      | -          | -     | -        |
| mnHDE.V 66 # | 1-18  | 1-26 | 3  | 4  | SRIVGATLDLY          | 11     | 1-5  | 1  | QQYNSYST    | 8      |            |       |          |
| mnHDE.V 69   | 3-21  | 3-3  | 3  | 6  | VTRVTIFGVVYYYYGMDV   | 19     | 2-28 | 2  | MQALQTPCT   | 9      | -          | -     | -        |
| mnHDE.V 73   | 3-66  | 3-22 | 2  | 4  | ILVYYDSSGYSYFFDY     | 16     | 1-39 | 2  | QQYSTPLYT   | 10     | -          | -     | -        |
| mnHDE.V 74 # | 1-3   | 1-26 | 3  | 5  | LVGAQNWFDP           | 10     | 1-43 | 1  | QQYSTPRT    | 9      |            |       |          |
| mnHDE.V 75   | 3-30  | 2-2  | 3  | 6  | VVPAAITSFYYYGM DV    | 16     | 1-12 | 1  | QQANSFPRT   | 9      | -          | -     | -        |
| mnHDE.V 81   | 3-13  | 2-21 | 2  | 2  | GSGNCGDCSYWYFDL      | 16     | 1-8  | 1  | QQYYSYPPT   | 9      | -          | -     | -        |
| mnHDE.V 82   | 3-66  | 6-19 | 2  | 5  | DRSGWYGGWFDP         | 12     | 1-9  | 4  | QQLNSYPLT   | 9      | +          | +     | -        |
| mnHDE.V 85   | 4-59  | 3-22 | 2  | 4  | VGPNYYDSSGYLALDY     | 17     | 3-20 | 4  | QQYGSSPPGLT | 11     | -          | -     | -        |
| mnHDE.V 88   | 4-34  | 3-22 | 2  | 1  | GPKQTYYYDSSSYWLFQH   | 20     | 1-5  | 1  | QQYNSYSRT   | 9      | +2         | +     | N        |
| mnHDE.V 89   | 1-2   | 2-8  | 2  | 6  | DNLGGGYMDWVG         | 13     | 3-11 | 2  | QQRSNWPPYT  | 10     | -          | -     | -        |
| mnHDE.V 93   | 3-30  | 2-15 | 2  | 6  | GGYCSGNSCYLDYYYYGLDV | 21     | 3-15 | 4  | QQYNNWPPLT  | 10     | -          | -     | -        |
| mnHDE.V 96   | 3-21  | 6-6  | 3  | 3  | WGEKAARRTFDI         | 12     | 3-20 | 1  | QQYGSSPLWT  | 10     | -          | -     | -        |
|              | VH    | D    | RF | JH | CDR3 (aa)            | Length | VI   | Jl | CDR3 (aa)   | Length | Poly       | HEp-2 | Staining |
| mnHDE.V 57 # | 4-34  | 1-7  | 1  | 5  | GLLELPLNWFDP         | 12     | 2-14 | 2  | SSYTSSSTLV  | 10     |            |       |          |
| mnHDE.V 59   | 1-69  | 6-6  | 3  | 6  | EIIAARPLHYGMDV       | 17     | 2-14 | 2  | SSYTSSSTV   | 9      | +2         | +     | -        |
| mnHDE.V 74 # | 1-3   | 1-26 | 3  | 5  | LVGAQNWFDP           | 10     | 3-21 | 2  | QVWDSSSDHVV | 11     |            |       |          |
| mnHDE.V 78 # | 1-3   | 2-15 | 3  | 5  | VVAKALSFYWFDP        | 14     | 2-23 | 1  | CSYAGSSTFYV | 11     |            |       |          |
| mnHDE.V 84   | 1-3   | 2-15 | 3  | 4  | VVAKALSFYWG          | 12     | 2-8  | 1  | SSYAGSNNFV  | 10     | -          | -     | -        |
| mnHDE.V 85   | 4-59  | 3-22 | 2  | 4  | VGPNYYDSSGYLALDY     | 17     | 2-14 | 2  | SSYTSSSTQV  | 10     | -          | -     | -        |
| mnHDE.V 92   | 3-48  | 3-10 | 1  | 6  | VIMRRFGRHYMDV        | 14     | 1-40 | 3  | QSYDSSLGGSV | 11     | +2         | +     | c        |
|              | VH    | D    | RF | JH | CDR3 (aa)            | Length | V    | J  | CDR3(aa)    | Length | Poly       | HEp-2 | Staining |
| mnHDE.V 50   | 3-9   | 5-24 | 1  | 4  | DMSGGRWLQSLYFDY      | 15     |      |    |             |        |            |       |          |
| mnHDE.V 64   | 4-61  | 6-13 | 3  | 6  | EPTAGYEPLYYYGMDG     | 17     |      |    |             |        |            |       |          |
| mnHDE.V 65   | 3-23  | 3-9  | 1  | 5  | RTYSSRGDWFPD         | 12     |      |    |             |        |            |       |          |
| mnHDE.V 70   | 3-49  | 1-26 | 3  | 5  | GGVVGATRWFPD         | 12     |      |    |             |        |            |       |          |
| mnHDE.V 72   | 3-21  | 4-23 | 3  | 6  | DLTLLTGYYYGMDV       | 14     |      |    |             |        |            |       |          |
| mnHDE.V 79   | 1-58  | 3-10 | 1  | 6  | ELWFGELPIPYGMD       | 15     |      |    |             |        |            |       |          |
| mnHDE.V 90   | 4-59  | 3-16 | /  | 2  | RAEYWFYFDL           | 9      |      |    |             |        |            |       |          |

RF, reading frame; #, antibody failed to be expressed

-, non-reactive; +, reactive; +2, highly reactive

c, diffuse cytoplasmic staining; A, actin staining; G, Golgi staining; M, mitochondria staining; N, nuclear staining



**Supplemental Table 22.** Repertoire and reactivity of antibodies from mature naïve B cells of healthy donor E.II.

| Ig            | HEAVY |      |    |    |                    | LIGHT  |      |    |             | REACTIVITY |      |       |          |
|---------------|-------|------|----|----|--------------------|--------|------|----|-------------|------------|------|-------|----------|
|               | VH    | D    | RF | JH | CDR3 (aa)          | Length | Vk   | Jk | CDR3 (aa)   | Length     | Poly | HEp-2 | Staining |
| mnHDE.II 01   | s     | 6-13 | 2  | 5  | VVYSSSWPPGNWFDP    | 15     | 1-39 | 3  | QQSYSTLFT   | 9          | -    | -     | -        |
| mnHDE.II 03 # | 3-21  | 3-10 | 1  | 4  | GPELLWFGELLPYFDY   | 18     | 3-15 | 2  | QQYNNWPPMYT | 11         |      |       |          |
| mnHDE.II 06   | 1-46  | 6-19 | 3  | 4  | LVAGRLDY           | 8      | 1-9  | 4  | QQLNSY      | 6          | +    | -     | -        |
| mnHDE.II 10   | 1-2   | 3-22 | 3  | 3  | CSMIVVNDAFDI       | 12     | 1-38 | 2  | QQSYSTPFG   | 9          | -    | -     | -        |
| mnHDE.II 12 # | 3-33  | 4-17 | 2  | 4  | QAGDYEYFDY         | 11     | 1-5  | 3  | QQYNSYPLFT  | 10         |      |       |          |
| mnHDE.II 18   | 1-18  | 3-10 | 2  | 4  | ERGIGSGMTGY        | 11     | 1-27 | 4  | QKYSAPLT    | 11         | -    | +     | -        |
| mnHDE.II 21   | 4-61  | 2-15 | 2  | 5  | VASGYCSGGSCYSPGWFD | 19     | 1D-8 | 1  | QQYYSFPWT   | 9          | -    | -     | -        |
| mnHDE.II 28   | 3-23  | 3-22 | 3  | 4  | ASGIVVPRYY         | 11     | 1-39 | 1  | QQSYSTRWT   | 9          | +    | -     | c        |
| mnHDE.II 30   | 3-9   | 3-22 | 2  | 4  | DNYDSSGYTSFDY      | 14     | 1-39 | 4  | QQSYSTPPT   | 9          | -    | -     | -        |
| mnHDE.II 31   | 3-23  | 4-17 | 3  | 5  | DNVTVTAAEGGWFD     | 16     | 2-28 | 1  | MQALQTPPA   | 9          | -    | -     | -        |
| mnHDE.II 32 # | 1-3   | 2-15 | 3  | 5  | DRRVVVAANWFDP      | 13     | 3-20 | 3  | QQYGSSPLT   | 9          |      |       |          |
| mnHDE.II 33   | 3-7   | 6-13 | 2  | 4  | QIGSSSWYEDARFDY    | 15     | 1-39 | 2  | QQSYSTPPMYT | 11         | -    | -     | -        |
| mnHDE.II 34   | 3-11  | 5-12 | 2  | 4  | ESRGGYAQRGFDY      | 13     | 2-28 | 2  | MQALQIPYT   | 9          | -    | -     | -        |
| mnHDE.II 45   | 3-9   | /    | /  | 4  | DRLGYFDY           | 8      | 3-20 | 1  | QQYGSSPRT   | 9          | -    | -     | -        |
| mnHDE.II 47   | 3-11  | 3-22 | 2  | 4  | VAYYDSSGYFVDY      | 15     | 3-15 | 1  | QQYNNWPGT   | 9          | -    | -     | -        |
| mnHDE.II 24   |       |      |    |    |                    |        | 1-8  | 1  | QQYYSYPLT   | 9          |      |       |          |
|               | VH    | D    | RF | JH | CDR3 (aa)          | Length | Vλ   | Jλ | CDR3 (aa)   | Length     | Poly | HEp-2 | Staining |
| mnHDE.II 02   | 3-48  | 6-25 | 2  | 4  | AGIGGYARFVYFDY     | 14     | 2-8  | 3  | SSYAGSNNLV  | 10         | -    | -     | -        |
| mnHDE.II 06   | 1-46  | 6-19 | 3  | 4  | LVAGRLDY           | 8      | 1-47 | 3  | AAWDDSLSGVV | 11         | +    | +     | -        |
| mnHDE.II 09   | 3-7   | 6-6  | 2  | 4  | DRFYSSSLFDY        | 12     | 1-40 | 3  | QSYDSSLVSV  | 12         | -    | -     | -        |
| mnHDE.II 12   | 3-33  | 4-17 | 2  | 4  | QAGDYEYFDY         | 11     | 2-8  | 3  | SSYAGSNNLV  | 10         | -    | -     | -        |
| mnHDE.II 22   | 3-33  | 6-13 | 2  | 5  | DGLLYSSSWYEGGHGWFD | 19     | 2-8  | 2  | SSYAGSNNLV  | 10         | -    | -     | -        |
| mnHDE.II 38   | 1-18  | 3-22 | 2  | 4  | DSSGTFDY           | 8      | 3-1  | 1  | QAWDSSTYV   | 9          | -    | -     | -        |
| mnHDE.II 48   | 4-61  | 1-7  | 2  | 3  | VDSPDWDWNLNRNIDY   | 15     | 2-23 | 3  | CSYAGSST    | 8          | +2   | -     | -        |
|               | VH    | D    | RF | JH | CDR3 (aa)          | Length | V    | J  | CDR3 (aa)   | Length     | Poly | HEp-2 | Staining |
| mnHDE.II 05   | 4-31  | 3-22 | 2  | 2  | AYYYDSSGYWFDY      | 13     |      |    |             |            |      |       |          |
| mnHDE.II 08   | 1-46  | 3-10 | 2  | 4  | ALNYGFFFDY         | 10     |      |    |             |            |      |       |          |

RF, reading frame; #, antibody failed to be expressed

-, non-reactive; +, reactive; +2, highly reactive

c, diffuse cytoplasmic staining; A, actin staining; G, Golgi staining; M, mitochondria staining; N, nuclear staining

**Supplemental Table 23.** Repertoire and reactivity of antibodies from mature naïve B cells of healthy donor D.III.

| Ig             | HEAVY |      |    |    |                        |        | LIGHT          |                |              |        | REACTIVITY |       |          |
|----------------|-------|------|----|----|------------------------|--------|----------------|----------------|--------------|--------|------------|-------|----------|
|                | VH    | D    | RF | JH | CDR3 (aa)              | Length | V <sub>κ</sub> | J <sub>κ</sub> | CDR3 (aa)    | Length | Poly       | HEp-2 | Staining |
| mnHDD.III 49 # | 5-51  | 4-17 | 2  | 6  | HYGDYDYYYYYGMDV        | 14     | 2-28           | 1              | MQALQTTPN    | 9      |            |       |          |
| mnHDD.III 50   | 4-59  | 3-22 | 2  | 4  | GGYDSSGYYPGGY          | 14     | 1-5            | 2              | QQYNSYPYT    | 9      | -          | -     | -        |
| mnHDD.III 51   | 3-30  | 2-21 | 3  | 4  | GGVVVIALDY             | 11     | 1-17           | 1              | LQHNSYPWT    | 9      | -          | -     | -        |
| mnHDD.III 58   | 3-15  | 3-22 | 2  | 4  | SNIIYYDSSGYDY          | 13     | 3-11           | 4              | QQRSNWPLTFG  | 12     | -          | -     | -        |
| mnHDD.III 65   | 3-30  | 5-5  | 1  | 2  | ESLTIQLWDEEGYFDL       | 17     | 1-13           | 3              | QQFNSYPFT    | 9      | -          | +     | -        |
| mnHDD.III 67   | 1-69  | 3-10 | 3  | 5  | DSSRITMVQGATNWFDP      | 17     | 1-39           | 1              | QQSYSTPRT    | 9      | +          | +     | -        |
| mnHDD.III 68   | 3-11  | 2-21 | 2  | 6  | ENPTYCGGDCYPEYYYYGMDV  | 21     | 3-11           | 4              | QQRSNWLT     | 8      | -          | -     | -        |
| mnHDD.III 78   | 1-8   | 2-15 | 3  | 6  | GVVVAATGYYYYYGMDV      | 17     | 1-33           | 3              | QQYDNLLSFT   | 10     | -          | -     | -        |
| mnHDD.III 79 # | 3-11  | 3-22 | 2  | 6  | DWPLNTGYYYYYGMDV       | 15     | 1-33           | 4              | QQYDNLLPLT   | 9      |            |       |          |
| mnHDD.III 82   | 3-23  | 2-21 | 1  | 4  | GESSILW                | 7      | 3-15           | 4              | QQYNNWPLT    | 9      | -          | -     | -        |
| mnHDD.III 83   | 4-4   | 3-22 | 2  | 3  | AYDAFDI                | 7      | 3-11           | 4              | QQRSNWPL     | 8      | -          | -     | -        |
| mnHDD.III 84   | 3-48  | 2-8  | 2  | 4  | ALRTGGVCYTCDFDY        | 16     | 1-8            | 2              | QQYYSYPPYS   | 10     | -          | -     | N        |
| mnHDD.III 85   | 1-18  | 3-10 | 3  | 6  | DPTITMVQGGPGTYYYYYGMDV | 20     | 3-11           | 2              | QQRSNWPPYS   | 10     | -          | -     | -        |
| mnHDD.III 86   | 3-30  | /    | /  | 4  | DSLGYPTTEYFDY          | 13     | 3-15           | 1              | QQYNNWPPVA   | 10     | -          | -     | -        |
| mnHDD.III 87   | 1-18  | /    | /  | 4  | GSVAYFDY               | 8      | 1-5            | 2              | QQYNSYSYT    | 9      | -          | -     | -        |
| mnHDD.III 91   | 1-24  | 3-10 | 2  | 5  | IPRYYGSGSWPFDP         | 14     | 3-15           | 1              | QQYNNWPPWT   | 10     | -          | -     | -        |
| mnHDD.III 92   | 4-34  | /    | /  | 3  | GKGDDEDAFDI            | 11     | 4-1            | 3              | QQYSTPFT     | 9      | -          | -     | -        |
| mnHDD.III 93   | 3-23  | 3-9  | 2  | 5  | GGDILTYGYNWTFDP        | 15     | 3-15           | 2              | QQYNNWPGGS   | 10     | +          | -     | c        |
| mnHDD.III 96   | 5a    | 3-22 | 2  | 5  | LAEYDSSGHS             | 12     | 4-1            | 4              | QQYSTPLT     | 9      | -          | +     | c        |
| mnHDD.III 53   |       |      |    |    |                        |        | 2-28           | 4              | MQALQTPLT    | 9      |            |       |          |
| mnHDD.III 59   |       |      |    |    |                        |        | 2-28           | 2              | MQALQTPRSYT  | 11     |            |       |          |
|                | VH    | D    | RF | JH | CDR3 (aa)              | Length | V <sub>κ</sub> | J <sub>κ</sub> | CDR3 (aa)    | Length | Poly       | HEp-2 | Staining |
| mnHDD.III 54   | 3-73  | 5-12 | 3  | 6  | HQGDIVATTTYYYYGMDV     | 18     | 3-25           | 3              | QSADSSGTYYWV | 11     | -          | -     | -        |
| mnHDD.III 63   | 3-15  | 1-1  | 2  | 4  | YNWNEGLGGY             | 10     | 6-57           | 3              | QSYDSSTWV    | 9      | -          | -     | -        |
| mnHDD.III 71   | 1-36  | 6-13 | 1  | 5  | ERQQLVQTGFDP           | 12     | 1-47           | 2              | AAWDDSLSGQV  | 11     | -          | -     | -        |
| mnHDD.III 77   | 3-48  | 6-19 | 1  | 3  | DRKQWHRDAFDI           | 12     | 1-44           | 3              | AAWDDSLNGWV  | 11     | -          | +     | c        |
| mnHDD.III 80 # | 3-23  | 1-7  | 1  | 4  | YLIELEPPRYFDY          | 14     | 1-40           | 3              | QSYDSSLSGTV  | 11     |            |       |          |
| mnHDD.III 90   | 3-30  | 6-13 | 2  | 3  | DFYSSLSAFDI            | 12     | 6-57           | 3              | QSYDSSAHWV   | 10     | -          | -     | -        |
| mnHDD.III 94   | 1-69  | 5-5  | 3  | 4  | SPLGAAMVVVDY           | 12     | 1-44           | 7              | AAWDDSLNGAV  | 11     | +2         | +     | -        |
| mnHDD.III 89   |       |      |    |    |                        |        | 3-35           | 3              | QSADSTGTALWV | 12     |            |       |          |
|                | VH    | D    | RF | JH | CDR3 (aa)              | Length | V              | J              | CDR3 (aa)    | Length | Poly       | HEp-2 | Staining |
| mnHDD.III 61   | 3-33  | 2-2  | 2  | 4  | WPEGGTSCYGCYFDY        | 15     |                |                |              |        |            |       |          |
| mnHDD.III 88   | 3-33  | /    | /  | 3  | ERDAFDI                | 7      |                |                |              |        |            |       |          |

RF, reading frame; #, antibody failed to be expressed

-, non-reactive; +, reactive; +2, highly reactive

c, diffuse cytoplasmic staining; A, actin staining; G, Golgi staining; M, mitochondria staining; N, nuclear staining

**Supplemental Table 24.** Repertoire and reactivity of antibodies from mature naïve B cells of CVID patient 321.

| Ig             | HEAVY |      |    |    |                          | LIGHT  |      |    |             | REACTIVITY |      |       |          |
|----------------|-------|------|----|----|--------------------------|--------|------|----|-------------|------------|------|-------|----------|
|                | VH    | D    | RF | JH | CDR3 (aa)                | Length | Vκ   | Jκ | CDR3 (aa)   | Length     | Poly | HEp-2 | Staining |
| neCVID321 07   | 4-55  | 1-1  | 1  | 4  | GSRRELERREFDY            | 13     | 2-24 | 1  | MQATQFPWWT  | 9          | -    | -     | -        |
| neCVID321 08   | 3-48  | 3-3  | 3  | 4  | ADFGVVG                  | 8      | 1-12 | 4  | QQANSFPPLT  | 10         | -    | +     | -        |
| neCVID321 10   | 1-18  | 5-5  | 3  | 6  | DSAIRTAMVTFSSYYGMDV      | 18     | 1-39 | 2  | QQSYSTLYT   | 9          | -    | +     | -        |
| neCVID321 11   | 1-18  | 5-5  | 3  | 6  | EVDTAPGGGFWYYGMDV        | 17     | 3-15 | 1  | QQYNNWPRT   | 9          | -    | +     | c        |
| neCVID321 13   | 3-23  | 5-24 | 2  | 4  | NAAGGGYNSLDY             | 12     | 3-11 | 4  | QQRSNWPLT   | 9          | -    | -     | -        |
| neCVID321 19 # | 3-48  | 2-2  | 3  | 5  | AIVSVPAASPGWFDP          | 15     | 3-15 | 4  | QQYNNWPPLT  | 10         |      |       |          |
| neCVID321 21   | 3-48  | 3-22 | 2  | 5  | ERRDYDSSGYVNWVDFP        | 17     | 1-17 | 3  | LQHNSYPLT   | 9          | -    | -     | c        |
| neCVID321 22 # | 4-39  | /    | /  | 5  | HRAARSSPGWFDP            | 13     | 1-39 | 2  | QQSYSTPYT   | 9          |      |       |          |
| neCVID321 23   | 3-53  | 2-15 | 2  | 6  | HCSGGSCYYYYYGMV          | 17     | 3-15 | 1  | QQYNNWPPWT  | 10         | +    | -     | -        |
| neCVID321 28   | 3-48  | 3-10 | 2  | 6  | KYYGSGKANYYYGMDV         | 17     | 1-39 | 2  | QQSYSTPPT   | 9          | -    | -     | -        |
| neCVID321 30   | 4-34  | 4-17 | 2  | 4  | VSGRKYGDFCR              | 11     | 1-39 | 1  | QQSYSTPRT   | 9          | -    | -     | -        |
| neCVID321 34   | 3-30  | 2-2  | 3  | 4  | VGGIVVPAAPDY             | 13     | 1-12 | 4  | QQANSFPLT   | 9          | +    | +     | c        |
| neCVID321 35   | 3-9   | 3-22 | 2  | 4  | DTLPRYYDSSGNDY           | 14     | 3-11 | 4  | QQRSNWPPRIT | 11         | -    | -     | -        |
| neCVID321 36   | 3-53  | 6-6  | 2  | 3  | GRYSSSSGGGAFDI           | 14     | 3-15 | 3  | QQYNNWPLFT  | 11         | -    | +     | -        |
| neCVID321 39   | 3-48  | 5-24 | 2  | 3  | LYRRDGYNSPEGGAFDI        | 17     | 1-27 | 1  | QKYNAPWT    | 9          | -    | -     | -        |
| neCVID321 42   | 3-21  | 2-2  | 2  | 5  | GYCSSTSCYEGEDNWVDFP      | 18     | 1-8  | 1  | QQYSSYPRT   | 9          | -    | -     | -        |
| neCVID321 43   | 4-34  | 3-22 | 2  | 4  | PYDSSGYGY                | 9      | 3-11 | 1  | QQRSNWPRS   | 9          | -    | +     | -        |
| neCVID321 44   | 3-23  | 6-6  | 2  | 4  | SRLVGRDGSSSSGDWGLWFGESLV | 26     | 4-1  | 4  | QQYYSTPLT   | 9          | -    | +     | c        |
|                | VH    | D    | RF | JH | CDR3 (aa)                | Length | Vλ   | Jλ | CDR3 (aa)   | Length     | Poly | HEp-2 | Staining |
| neCVID321 02   | 4-34  | 6-6  | 2  | 4  | ESSSSFYD                 | 8      | 1-40 | 3  | QSYDSSLGWW  | 11         | -    | -     | -        |
| neCVID321 05   | 3-15  | 6-13 | 2  | 4  | DRGWSSWPAVGY             | 13     | 1-40 | 2  | QSYDSSLVHV  | 12         | -    | +     | c        |
| neCVID321 06   | 3-33  | 2-15 | 2  | 4  | DLGYCSGGSCYFFPAY         | 17     | 2-14 | 2  | SSYTSSSHV   | 10         | -    | -     | A        |
| neCVID321 14   | 5-51  | 2-2  | 2  | 5  | RRGRQPGYCSSTSCYTGWFDP    | 22     | 2-14 | 1  | SSYTSSSTYV  | 10         | +    | +     | N+c      |
| neCVID321 17   | 3-13  | 1-26 | 2  | 6  | EPRLGLVSGSKYGMDV         | 16     | 3-1  | 1  | QAWDSSTDYV  | 10         | +    | -     | -        |
| neCVID321 20   | 1-8   | 3-3  | 2  | 6  | GRDPIWVSGYFYGGMDV        | 16     | 1-40 | 3  | QSYDSSLGSRV | 12         | -    | -     | -        |
| neCVID321 29   | 3-30  | 3-22 | 2  | 6  | DALPRQTYYYDSRDLYYYGMDV   | 24     | 3-1  | 2  | QAWDSSTALV  | 10         | -    | -     | c        |
| neCVID321 32   | 4-59  | 4-17 | 3  | 6  | GAAVTTVSGYYYGMDV         | 17     | 3-25 | 1  | QSADSSGTLYV | 11         | -    | +     | -        |
| neCVID321 46   | 1-69  | 6-19 | 2  | 6  | GQALSPSSGWYWWYYGMDV      | 20     | 2-14 | 1  | SSYTSSSTLYV | 12         | +2   | +2    | c        |
| neCVID321 48   | 3-23  | 1-1  | 3  | 5  | EGTGTWPIVNWVDFP          | 15     | 1-40 | 2  | QSYDSSLGFVV | 12         | -    | -     | -        |
|                | VH    | D    | RF | JH | CDR3 (aa)                | Length | V    | J  | CDR3 (aa)   | Length     | Poly | HEp-2 | Staining |
| neCVID321 15   | 4-59  | 3-3  | 1  | 5  | RVLRRGWVDFP              | 10     |      |    |             |            |      |       |          |
| neCVID321 16   | 1-18  | /    | /  | 4  | EANLSPLDY                | 9      |      |    |             |            |      |       |          |
| neCVID321 18   | 1-46  | 3-22 | 2  | 4  | APNYDSSGYEYDY            | 15     |      |    |             |            |      |       |          |
| neCVID321 25   | 3-43  | 3-10 | 3  | 6  | DSTMVRGVEGDYWWYYGMDV     | 20     |      |    |             |            |      |       |          |
| neCVID321 37   | 3-23  | 3-3  | 3  | 6  | TAPTRTGITIFGVVAPAGNGMDV  | 24     |      |    |             |            |      |       |          |

RF, reading frame; #, antibody

-, non-reactive; +, reactive; +2, highly reactive

c, diffuse cytoplasmic staining; A, actin staining; G, Golgi staining; M, mitochondria staining; N, nuclear staining

**Supplemental Table 25.** Repertoire and reactivity of antibodies from mature naive B cells of COVID patient Y17.

| Ig             | HEAVY |      |    |    |                        |        | LIGHT |    |             |        | REACTIVITY |       |          |
|----------------|-------|------|----|----|------------------------|--------|-------|----|-------------|--------|------------|-------|----------|
|                | VH    | D    | RF | JH | CDR3 (aa)              | Length | Vk    | Jk | CDR3 (aa)   | Length | Poly       | HEp-2 | Staining |
| mnCVIDY17 02   | 1-18  | 1-26 | 2  | 6  | DRGSYSPLYYYGMDV        | 15     | 2-28  | 5  | MQALQTPAT   | 9      | -          | -     | -        |
| mnCVIDY17 03   | 3-33  | 4-17 | 2  | 3  | DFVADYGDYNDAFDI        | 15     | 4-1   | 1  | QQYYSTRWT   | 9      | -          | -     | -        |
| mnCVIDY17 04   | 4-31  | /    | /  | 4  | EGSFPYFDY              | 10     | 3-20  | 1  | QQYGSSPWT   | 9      | -          | -     | -        |
| mnCVIDY17 08   | 4-31  | 3-9  | 1  | 5  | GTGYFDWLLLSGSVEYWFDP   | 21     | 3-15  | 1  | QQYNNWPPWT  | 10     | +2         | +2    | c        |
| mnCVIDY17 10   | 4-59  | 1-7  | 3  | 5  | QSRFGITGTRVFMGWDFP     | 19     | 1-8   | 3  | QQTTSYPPS   | 9      | -          | +     | -        |
| mnCVIDY17 11   | 3-23  | /    | /  | 4  | DSLGVVYVY              | 8      | 1-5   | 1  | QQYNSYSAWT  | 10     | +2         | -     | -        |
| mnCVIDY17 12   | 1-2   | 2-15 | 2  | 4  | AQAGGCSGGSCYRCFDY      | 17     | 1-12  | 3  | QQANSFPPT   | 9      | -          | -     | -        |
| mnCVIDY17 13   | 4-39  | 2-15 | 2  | 5  | PNHLGYCSGGSCYDH        | 15     | 2-40  | 2  | MQRIEFPYT   | 9      | -          | -     | -        |
| mnCVIDY17 15   | 1-69  | 5-5  | 2  | 5  | DRGYSYGYWFDP           | 13     | 3-20  | 1  | QQYGSSPT    | 8      | +          | +2    | -        |
| mnCVIDY17 16   | 4-31  | 4-17 | 2  | 4  | ERHGDYEGVYFDY          | 14     | 2-28  | 2  | MQALQTPYT   | 9      | -          | -     | -        |
| mnCVIDY17 20 # | 1-46  | 3-3  | 2  | 6  | RIWDYDFWSGYWEDYYGMDV   | 21     | 3-20  | 1  | QQYGSSSGT   | 9      |            |       |          |
| mnCVIDY17 21   | 4-39  | 1-26 | 3  | 4  | RVVIGATLFDY            | 11     | 3-20  | 4  | QQYGSSSPLT  | 9      | -          | +2    | c        |
| mnCVIDY17 22 # | 3-9   | 6-19 | 2  | 4  | DMYSSGWSHPFDY          | 13     | 1-5   | 1  | QQYNSYSRT   | 9      |            |       |          |
| mnCVIDY17 23   | 1-46  | 3-3  | 3  | 4  | EGDITGGYTIFGVVILHPYFDY | 24     | 4-1   | 4  | QQYYSPLT    | 9      | -          | -     | -        |
| mnCVIDY17 24 # | 1-46  | 4-23 | 2  | 4  | DLSGGNSVSPYFDY         | 15     | 1-5   | 4  | QQYNSYPLT   | 9      |            |       |          |
| mnCVIDY17 25   | 3-33  | 3-3  | 3  | 4  | STIFGVVTPMGY           | 12     | 1-5   | 1  | QQYNSYWT    | 8      | +          | +     | -        |
| mnCVIDY17 29 # | 1-69  | 6-13 | 2  | 5  | AGYSSWRDNWFDP          | 14     | 3-11  | 4  | QQRSNWPLT   | 9      |            |       |          |
| mnCVIDY17 32   | 4-39  | 3-3  | 2  | 5  | FGGYVHNWFDP            | 12     | 1-8   | 3  | QQYYSYPFT   | 9      | +2         | +2    | -        |
| mnCVIDY17 34 # | 1-18  | /    | /  | 6  | DPPDYYYGMDV            | 12     | 1-5   | 1  | QQYNSYSKT   | 9      |            |       |          |
| mnCVIDY17 37   | 1-2   | 3-22 | 3  | 5  | GQISLRGFTMIVS          | 13     | 1-39  | 2  | QQSYSTPYT   | 9      | +          | +     | -        |
| mnCVIDY17 42   | 4-4   | 3-3  | 2  | 6  | AAKFWSGYSMDV           | 12     | 1-39  | 2  | QQSYSTPLYT  | 10     | -          | -     | -        |
| mnCVIDY17 43   | 4-39  | 6-6  | 3  | 6  | AAADQYGMDV             | 10     | 2-30  | 2  | MQGTHWPPMYT | 11     | -          | -     | -        |
| mnCVIDY17 44   | 4-59  | 3-3  | 2  | 3  | DILHYDFWGGYYMTRDAFDI   | 21     | 1-16  | 4  | QQYNSYPLT   | 9      | +          | -     | -        |
| mnCVIDY17 45   | 1-18  | 1-26 | 2  | 4  | SGSYFPGY               | 8      | 1-9   | 1  | QQLNSYPTWT  | 10     |            |       |          |
| mnCVIDY17 46   | 4-34  | 4-17 | 2  | 4  | GGDYGDYPRLDFDY         | 14     | 3-11  | 4  | QQRNSLT     | 8      |            |       |          |
| mnCVIDY17 48   | 4-39  | 2-15 | 2  | 2  | QQYCSGGSCYESPHYWYFDL   | 20     | 1-13  | 4  | QQFNSYPLT   | 9      |            |       |          |
| mnCVIDY17 06   |       |      |    |    |                        |        | 3-11  | 4  | QQYYSYPPS   | 9      |            |       |          |
| mnCVIDY17 28   |       |      |    |    |                        |        | 4-1   | 2  | QQYYSTPYT   | 9      |            |       |          |
| mnCVIDY17 30   |       |      |    |    |                        |        | 3-20  | 2  | QQYGSSPRGYT | 11     |            |       |          |
| mnCVIDY17 31   |       |      |    |    |                        |        | 3-20  | 5  | QQYSSIT     | 8      |            |       |          |
|                | VH    | D    | RF | JH | CDR3 (aa)              | Length | Vk    | Jk | CDR3 (aa)   | Length | Poly       | HEp-2 | Staining |
| mnCVIDY17 09 # | 1-69  | 6-13 | 2  | 6  | TGYSSSWPMDV            | 11     | 3-25  | 2  | QSADSSVV    | 8      |            |       |          |
| mnCVIDY17 14   | 4-39  | 3-22 | 2  | 4  | RHLGYVYFDY             | 11     | 4-69  | 3  | QWTGTGIQV   | 9      | -          | +     | -        |
| mnCVIDY17 18   | 1-46  | 6-13 | 1  | 4  | DYKGWQQLPFDY           | 13     | 3-21  | 3  | QVWDSSEVV   | 10     | -          | -     | -        |
| mnCVIDY17 19   | 3-23  | /    | /  | 6  | VRAEQNKYYYYYHGMVDV     | 17     | 3-1   | 3  | QAWDSSTAVV  | 10     | -          | +     | N+c      |
| mnCVIDY17 33   | 3-33  | 2-2  | 2  | 4  | DPCSSTSCYHFDY          | 13     | 3-1   | 2  | QAWDSSTVV   | 9      | -          | -     | N+c      |
| mnCVIDY17 35   | 1-2   | 6-19 | 2  | 4  | DRLYSSGWSFFDY          | 13     | 3-1   | 2  | QAWDSSTVV   | 9      | -          | -     | -        |
| mnCVIDY17 36   | 4-59  | 3-22 | 2  | 5  | GHYYDSSGPGDFGDFP       | 17     | 1-44  | 1  | AAWDDSLNVWT | 11     | -          | -     | -        |
| mnCVIDY17 40   | 3-33  | 2-15 | 2  | 6  | DRGCSGGSCYNIDYYGMDV    | 20     | 7-46  | 3  | LLSYSGAWV   | 9      | -          | -     | -        |
| mnCVIDY17 47   | 3-23  | 3-10 | 1  | 6  | VSAKWFGGPRGMDV         | 14     | 7-43  | 2  | LLYYGGAVV   | 9      | +2         | +2    | c        |
|                |       |      |    |    |                        |        | 3-1   | 2  | QAWDSSTAV   | 9      |            |       |          |
|                | VH    | D    | RF | JH | CDR3 (aa)              | Length | V     | J  | CDR3 (aa)   | Length | Poly       | HEp-2 | Staining |
| mnCVIDY17 07   | 4-31  | 3-9  | 1  | 5  | GTGYFDWLLLSGSVEYWFDP   | 20     |       |    |             |        |            |       |          |
| mnCVIDY17 38   | 3-30  | 4-23 | 2  | 4  | APPDYGGNSLLGYFDY       | 17     |       |    |             |        |            |       |          |

RF, reading frame; #, antibody failed to be expressed

-, non-reactive; +, reactive; +2, highly reactive

c, diffuse cytoplasmic staining; A, actin staining; G, Golgi staining; M, mitochondria staining; N, nuclear staining

**Supplemental Table 26.** Repertoire and reactivity of antibodies from mature naïve B cells of CVID patient B.I.

| Ig             | HEAVY |      |    |    |                        | LIGHT  |      |    |              | REACTIVITY |      |       |          |
|----------------|-------|------|----|----|------------------------|--------|------|----|--------------|------------|------|-------|----------|
|                | VH    | D    | RF | JH | CDR3 (aa)              | Length | Vk   | Jk | CDR3 (aa)    | Length     | Poly | HEp-2 | Staining |
| mnCVIDB.I 03   | 3-66  | 3-22 | 2  | 4  | AYDSSGGYSHLSPDY        | 15     | 3-20 | 4  | QQPLT        | 5          | -    | -     | -        |
| mnCVIDB.I 09 # | 3-23  | 3-3  | 1  | 6  | AKCQRFLEWLLYPSDYGGMD   | 21     | 1-5  | 1  | QQYNSYSWT    | 9          | -    | -     | -        |
| mnCVIDB.I 10   | 3-23  | /    | /  | 4  | RVPSRGSFPDY            | 11     | 1-17 | 2  | LQHNSYPRGT   | 10         | -    | +     | N        |
| mnCVIDB.I 12   | 3-33  | /    | /  | 3  | GVFAFDI                | 7      | 2-30 | 1  | MQGTHWPPWT   | 10         | -    | +     | -        |
| mnCVIDB.I 16   | 3-9   | 6-19 | 2  | 4  | DKGTGFDY               | 8      | 3-20 | 1  | QQYGSSPRT    | 9          | -    | +     | -        |
| mnCVIDB.I 17 # | 5-51  | 5-5  | 2  | 6  | RGYSYGLDYYGMDV         | 15     | 1-12 | 3  | QQANSFPLT    | 9          | -    | -     | -        |
| mnCVIDB.I 19 # | 3-66  | 5-12 | 1  | 6  | DTLWLRSDYYGMDV         | 15     | 1-27 | 5  | QQYNNWPPIT   | 10         | -    | -     | -        |
| mnCVIDB.I 20   | 3-30  | 6-13 | 3  | 6  | AAAGSPYYYGMDV          | 14     | 1-17 | 1  | LQHNSYPWT    | 9          | +    | +     | -        |
| mnCVIDB.I 21   | 1-46  | 4-17 | 2  | 4  | SPTMYGDYDENGPFYD       | 17     | 1-9  | 2  | QQLNSYLPYT   | 10         | -    | -     | -        |
| mnCVIDB.I 22 # | 3-7   | 2-2  | 2  | 3  | EGSTSSMVDI             | 10     | 1-39 | 5  | QQSYSTPPT    | 9          | -    | -     | -        |
| mnCVIDB.I 29 # | 3-23  | 1-26 | 3  | 4  | DVGAYRSYFFDY           | 12     | 3-20 | 1  | QQYGSSLT     | 8          | -    | -     | -        |
| mnCVIDB.I 30   | 4-61  | 2-15 | 2  | 4  | DKYCSGGSCYSYGFYD       | 17     | 1-5  | 1  | QQYNSYSLT    | 9          | -    | -     | -        |
| mnCVIDB.I 32 # | 4-30  | 3-22 | 2  | 3  | DYDSSGYTKDAFDI         | 15     | 1-39 | 1  | QQSYSTPQT    | 9          | -    | -     | -        |
| mnCVIDB.I 33 # | 3-30  | 3-10 | 2  | 6  | EDTAMAPDNYYYGMDV       | 17     | 1-8  | 1  | QQYYSYPRT    | 9          | -    | -     | -        |
| mnCVIDB.I 34   | 3-21  | 3-3  | 2  | 4  | NLGSGRSDFWSGYVGNFDY    | 20     | 3-20 | 1  | QHQT         | 5          | +    | +     | c        |
| mnCVIDB.I 35   | 1-3   | 3-3  | 2  | 6  | DRPTGGYDFWSGYVGNFDY    | 19     | 1-39 | 1  | QQSYSTPRT    | 9          | +    | -     | -        |
| mnCVIDB.I 37   | 3-30  | /    | /  | 4  | DRFDY                  | 5      | 3-20 | 3  | QQYGSSLFT    | 9          | -    | -     | -        |
| mnCVIDB.I 43 # | 3-9   | 5-12 | 3  | 4  | GAGGEDIVASFYD          | 14     | 1-27 | 1  | QKYNAPVT     | 9          | -    | -     | -        |
| mnCVIDB.I 45   | 4-61  | 3-22 | 2  | 6  | DSRGGNDSSGYVGNFDY      | 20     | 1-39 | 1  | QQSYSTPKT    | 9          | -    | +     | A        |
| mnCVIDB.I 47   | 4-34  | 2-15 | 3  | 5  | GGPRIGSVVVAATTRWFDP    | 20     | 3-15 | 5  | QQYNNWPPIT   | 10         | +    | -     | -        |
| mnCVIDB.I 48   | 4-31  | 6-13 | 2  | 6  | GPSSWAVGNYYYGMDV       | 17     | 3-15 | 3  | QQYNNWPEFT   | 11         | -    | -     | -        |
| mnCVIDB.I 11   |       |      |    |    |                        |        | 3-20 | 2  | QQYGSSPYT    | 9          | -    | -     | -        |
|                | VH    | D    | RF | JH | CDR3 (aa)              | Length | Vk   | Jk | CDR3 (aa)    | Length     | Poly | HEp-2 | Staining |
| mnCVIDB.I 06   | 4-39  | 6-19 | 1  | 6  | GDYKKQWLEEYGMVDV       | 16     | 1-47 | 3  | AAWDDSLSGVW  | 11         | -    | -     | -        |
| mnCVIDB.I 13 # | 4-4   | 6-6  | 2  | 4  | STEYSSSITYFDY          | 13     | 3-21 | 3  | QVWDSRV      | 7          | -    | -     | -        |
| mnCVIDB.I 14 # | 3-23  | 7-27 | 3  | 6  | ADGDIPEWAQDSYYYGGMDV   | 21     | 2-23 | 3  | CSYAGSSTSWW  | 13         | -    | -     | -        |
| mnCVIDB.I 18 # | 3-23  | 3-3  | 1  | 6  | ETRGLRFLEWLSPTYYYGGMDV | 23     | 2-14 | 2  | SSYTSSTRV    | 10         | -    | -     | -        |
| mnCVIDB.I 21 # | 3-9   | 3-22 | 2  | 4  | DLSSGYLLT IGY          | 14     | 2-14 | 2  | SSYTSSSVW    | 10         | -    | -     | -        |
| mnCVIDB.I 25   | 1-2   | 3-3  | 2  | 4  | GGSYPGVKFDY            | 11     | 2-23 | 3  | CSYAGSSTWV   | 10         | -    | -     | -        |
| mnCVIDB.I 28   | 3-23  | 4-23 | 1  | 6  | VLRWDYYYGGMDV          | 13     | 2-23 | 1  | SSYAGSNNPYV  | 11         | -    | +     | A        |
| mnCVIDB.I 31 # | 1-18  | 2-2  | 3  | 4  | DIRAMPTSLDY            | 12     | 1-51 | 2  | GTWDSLSAGV   | 11         | -    | -     | -        |
| mnCVIDB.I 34   | 1-2   | 6-19 | 1  | 4  | EVGEKQWPEPYIDY         | 14     | 1-47 | 3  | AAWDDSLSGPWV | 12         | -    | -     | c        |
| mnCVIDB.I 36   | 3-9   | 2-2  | 2  | 6  | DMGGHCSSTSCYYYGGMDV    | 22     | 2-8  | 3  | SSYAGSNNGV   | 10         | -    | -     | -        |
| mnCVIDB.I 37   | 3-7   | 6-19 | 2  | 4  | EAAVAGILIRLVPLQDY      | 18     | 1-51 | 1  | GTWDSLSAYV   | 11         | +    | +2    | -        |
| mnCVIDB.I 38 # | 3-53  | 6-6  | 2  | 6  | DKYSSSYHYVGGMDV        | 17     | 2-14 | 2  | SSYTSSTVW    | 10         | -    | -     | -        |
| mnCVIDB.I 40 # | 1-2   | /    | /  | 6  | LPPSTVLHYVGGMDV        | 15     | 1-47 | 3  | AAWDDSLSSVW  | 12         | -    | -     | -        |
| mnCVIDB.I 41 # | 3-30  | 3-10 | 2  | 2  | EGSGSSDWFYDL           | 12     | 3-25 | 3  | QSADSSGTSV   | 10         | -    | -     | -        |
| mnCVIDB.I 44 # | 3-23  | 6-6  | 2  | 4  | GIGSSYHHPDQNYFDY       | 16     | 3-1  | 2  | QAWDSSSVV    | 9          | -    | -     | -        |
| mnCVIDB.I 45   | 3-7   | /    | /  | 4  | PPS                    | 3      | 2-8  | 1  | MQGTHWPPWT   | 11         | +2   | +     | -        |
| mnCVIDB.I 47   | 4-39  | 3-10 | 1  | 4  | AILWFGEIVFDY           | 13     | 2-23 | 2  | CSYAGSSTLV   | 10         | +    | +     | -        |
| mnCVIDB.I 11   |       |      |    |    |                        |        | 2-14 | 2  | SSYTSSTVW    | 10         | -    | -     | -        |
|                | VH    | D    | RF | JH | CDR3 (aa)              | Length | V    | J  | CDR3 (aa)    | Length     | Poly | HEp-2 | Staining |
| mnCVIDB.I 07   | 4-34  | 3-22 | 3  | 3  | FSRDLFTMIVVSVVADDAFDI  | 23     |      |    |              |            | -    | -     | -        |
| mnCVIDB.I 15   | 1-18  | 3-3  | 3  | 5  | ARDFGVVNFDP            | 11     |      |    |              |            | -    | -     | -        |
| mnCVIDB.I 24   | 1-8   | 3-9  | 3  | 6  | GQVDVPIPRYYYGGMDV      | 18     |      |    |              |            | -    | -     | -        |

RF, reading frame; #, antibody failed to be expressed

-, non-reactive; +, reactive; +2, highly reactive

c, diffuse cytoplasmic staining; A, actin staining; G, Golgi staining; M, mitochondria staining; N, nuclear staining

**Supplemental Table 27.** Repertoire and reactivity of antibodies from mature naïve B cells of CVID patient G.I.

| Ig           | HEAVY |      |    |    |                          |        | LIGHT |    |        | REACTIVITY |       |          |
|--------------|-------|------|----|----|--------------------------|--------|-------|----|--------|------------|-------|----------|
|              | VH    | D    | RF | JH | CDR3 (aa)                | Length | Vk    | Jk | Length | Poly       | HEp-2 | Staining |
| mnCVIDG.I 10 | 1-69  | 6-6  | 3  | 4  | GSIAARGGDY               | 10     | 1-33  | 2  | 11     | -          | -     | -        |
| mnCVIDG.I 25 | 1-8   | 2-15 | 2  | 5  | SLYCSGGSCYSS             | 12     | 3-11  | 4  | 9      | +          | +     | N        |
| mnCVIDG.I 27 | 3-66  | /    | /  | 6  | GEYYYGMDV                | 9      | 1-39  | 1  | 9      | -          | -     | -        |
| mnCVIDG.I 33 | 1-18  | 1-26 | 1  | 4  | DWGELLKRKGIDY            | 13     | 3-15  | 2  | 10     | +          | +     | c        |
| mnCVIDG.I 38 | 3-30  | 6-6  | 2  | 4  | AGYSSSAGAFDY             | 12     | 1-39  | 2  | 9      | -          | -     | -        |
| mnCVIDG.I 44 | 3-33  | 6-13 | 3  | 4  | DQLAAAGLYFDY             | 13     | 1-39  | 2  | 11     | -          | -     | -        |
|              | VH    | D    | RF | JH | CDR3 (aa)                | Length | Vλ    | Jλ | Length | Poly       | HEp-2 | Staining |
| mnCVIDG.I 04 | 3-33  | 3-10 | 2  | 6  | NRRRQYYGSGSYTTRPYYYYGMDV | 26     | 3-1   | 3  | 8      | +2         | +2    | N        |
| mnCVIDG.I 05 | 3-30  | 3-22 | 2  | 5  | GLSYLYYDSSGYWFD          | 17     | 1-51  | 3  | 11     | +          | -     | -        |
| mnCVIDG.I 14 | 3-53  | 3-3  | 2  | 6  | DRYDFWSGYPDAFDI          | 15     | 2-14  | 1  | 12     | -          | +     | -        |
| mnCVIDG.I 18 | 4-34  | 3-10 | 3  | 4  | VHLMVRSQFDY              | 11     | 2-23  | 3  | 11     | -          | -     | -        |
| mnCVIDG.I 19 | 3-30  | 3-10 | 1  | 4  | GGLWFGEPQRKNYFAY         | 16     | 1-36  | 3  | 11     | -          | +     | -        |
| mnCVIDG.I 30 | 3-23  | 2-15 | 1  | 4  | GWWYRVTAFDY              | 11     | 2-11  | 3  | 10     | +          | +     | c        |
| mnCVIDG.I 42 | 3-33  | 6-19 | 3  | 6  | VGAVIHADWDYYGMDV         | 16     | 3-21  | 3  | 13     | -          | -     | -        |
| mnCVIDG.I 43 | 4-34  | 6-13 | 3  | 5  | FLAAAGLGWFDP             | 12     | 3-21  | 3  | 12     | -          | -     | -        |
| mnCVIDG.I 34 |       |      |    |    |                          |        | 3-1   | 3  | 8      |            |       |          |
|              | VH    | D    | RF | JH | CDR3 (aa)                | Length | V     | J  | Length | Poly       | HEp-2 | Staining |
| mnCVIDG.I 41 | 18-1  | 4-17 | 2  | 4  | ENYGDYEH                 | 8      |       |    |        |            |       |          |
| mnCVIDG.I 46 | 3-21  | 6-13 | 2  | 6  | DAGSSWYARFGGYLFTNYGMDV   | 22     |       |    |        |            |       |          |

RF, reading frame; #, antibody failed to be expressed

-, non-reactive; +, reactive; +2, highly reactive

c, diffuse cytoplasmic staining; A, actin staining; G, Golgi staining; M, mitochondria staining; N, nuclear staining

**Supplemental Table 28.** Repertoire and reactivity of antibodies from mature naïve B cells of CVID patient A.II.1.

| Ig                | HEAVY |      |    |    |                     |        | LIGHT |    |             |        | REACTIVITY |       |          |
|-------------------|-------|------|----|----|---------------------|--------|-------|----|-------------|--------|------------|-------|----------|
|                   | VH    | D    | RF | JH | CDR3 (aa)           | Length | Vk    | Jk | CDR3 (aa)   | Length | Poly       | HEp-2 | Staining |
| mnCVIDA.II.1 02   | 3-23  | /    | /  | 4  | VSRTLPLGY           | 9      | 1-5   | 2  | QQYNSYYPGYT | 11     | +2         | +     | -        |
| mnCVIDA.II.1 04   | 4-34  | 2-2  | 3  | 5  | RDGTGVVPAQAQYNWFDP  | 20     | 2-18  | 2  | MQALQTPRT   | 9      | -          | -     | -        |
| mnCVIDA.II.1 07   | 3-23  | /    | /  | 6  | GASSARSYGMDV        | 13     | 2-28  | 2  | MQALQTPRT   | 9      | +          | +     | -        |
| mnCVIDA.II.1 11   | 4-4   | 3-22 | 2  | 4  | DNDSSGYFTLYYFDY     | 16     | 3-20  | 1  | QQCGSPPWT   | 10     | -          | -     | -        |
| mnCVIDA.II.1 18   | 3-23  | 4-4  | 2  | 6  | DYSNRYYYYGMDV       | 14     | 1-39  | 1  | QQSYSTPFT   | 9      | +          | -     | -        |
| mnCVIDA.II.1 20   | 4-31  | 3-10 | 2  | 6  | DRRGYSGIVLGEYYYGMDV | 21     | 3-20  | 2  | QQYGSSYT    | 8      | +          | -     | -        |
| mnCVIDA.II.1 24 # | 4-39  | 3-9  | 2  | 4  | QGAGYYSQFDY         | 11     | 4-1   | 4  | QQYYSTPLT   | 9      |            |       |          |
| mnCVIDA.II.1 30   | 3-33  | 2-15 | 3  | 3  | NTPEAHVVVAATGYDAFDI | 20     | 1-39  | 3  | QQSYSTPDT   | 9      | +          | +     | c        |
| mnCVIDA.II.1 35   | 3-23  | 6-19 | 3  | 6  | ETLVAGTPYYYYYGMVDV  | 18     | 1-5   | 2  | QQYNSYSRT   | 9      | +2         | +2    | -        |
| mnCVIDA.II.1 43 # | 3-64  | 1-7  | 3  | 4  | SSGTTDYFDY          | 10     | 1-39  | 3  | QQSYSTPFT   | 9      |            |       |          |
| mnCVIDA.II.1 46   | 4-4   | 3-22 | 2  | 5  | LGYYTSSGLIQ         | 14     | 2-28  | 2  | MQALQHT     | 8      | -          | -     | -        |
| mnCVIDA.II.1 48   | 4-31  | 3-3  | 2  | 4  | FGPNYDFWGSTIDY      | 14     | 3-20  | 5  | QQYGSSPIT   | 9      | +          | +     | -        |
|                   | VH    | D    | RF | JH | CDR3 (aa)           | Length | Vλ    | Jλ | CDR3 (aa)   | Length | Poly       | HEp-2 | Staining |
| mnCVIDA.II.1 01   | 4-39  | 4-23 | 2  | 1  | VQYGGKSAEYFQH       | 14     | 1-40  | 2  | QSYDSSLGSSV | 12     | -          | +     | -        |
| mnCVIDA.II.1 04 # | 1-8   | 6-6  | 2  | 6  | GALSSSFYYYYYGMVDV   | 17     | 3-1   | 2  | QAWDSSTVV   | 9      |            |       |          |
| mnCVIDA.II.1 12   | 3-15  | 4-4  | 3  | 6  | ATVTTPPYYYYYGMVDV   | 15     | 3-1   | 2  | QAWDSSTVV   | 9      | -          | -     | -        |
| mnCVIDA.II.1 21   | 1-69  | 5-5  | 2  | 5  | DLYSLGDAPS          | 10     | 2-8   | 2  | SSYAGSNNLV  | 10     | +2         | +     | -        |
| mnCVIDA.II.1 36   | 3-9   | 5-24 | 1  | 4  | DGERWLQNFYD         | 11     | 2-23  | 3  | CSYAGSST    | 8      | -          | -     | -        |
| mnCVIDA.II.1 39   | 4-31  | 3-10 | 1  | 4  | GWVRWFGELTHFDY      | 14     | 2-11  | 2  | CSGV        | 4      | +2         | +     | N        |
|                   | VH    | D    | RF | JH | CDR3 (aa)           | Length | V     | J  | CDR3 (aa)   | Length | Poly       | HEp-2 | Staining |
| mnCVIDA.II.1 40   | 3-23  | 6-13 | 2  | 4  | HLWDGYSSSWYFDY      | 14     |       |    |             |        |            |       |          |

RF, reading frame; #, antibody failed to be expressed

-, non-reactive; +, reactive; +2, highly reactive

c, diffuse cytoplasmic staining; A, actin staining; G, Golgi staining; M, mitochondria staining; N, nuclear staining

**Supplemental Table 29.** Repertoire and reactivity of antibodies from mature naïve B cells of CVID patient 1001.

| Ig               | HEAVY |      |    |    |                        |        | LIGHT          |                |              |        | REACTIVITY |       |          |
|------------------|-------|------|----|----|------------------------|--------|----------------|----------------|--------------|--------|------------|-------|----------|
|                  | VH    | D    | RF | JH | CDR3 (aa)              | Length | V <sub>κ</sub> | J <sub>κ</sub> | CDR3 (aa)    | Length | Poly       | HEp-2 | Staining |
| mnCVID1001 46    | 4-39  | /    | /  | 6  | HVPTSYYYYGMDV          | 13     | 1-27           | 1              | QKYNAPWT     | 9      | +2         | -     | -        |
| mnCVID1001 52    | 4-59  | 6-19 | 2  | 6  | DAQGVGSGWVYYYYGMDV     | 18     | 3-20           | 2              | QQYGSSPYT    | 9      | +2         | +     | -        |
| mnCVID1001 59    | 3-15  | 3-22 | 2  | 4  | DEGQVWYYDSSGYLNY       | 16     | 3-15           | 1              | QQYNNWPPWT   | 10     | -          | -     | -        |
| mnCVID1001 69    | 4-4   | 6-13 | 2  | 4  | DDGYGSFDY              | 9      | 3-11           | 4              | QQRNQLT      | 8      | -          | -     | -        |
| mnCVID1001 70    | 4-34  | 3-3  | 3  | 6  | CITIFGAGMDV            | 11     | 3-15           | 2              | QQYNNWPRVYT  | 11     | +2         | +     | c        |
| mnCVID1001 80    | 3-33  | 3-9  | 2  | 6  | GILSYYYYYGMDV          | 13     | 1-9            | 4              | QQLNSYPSA    | 9      | +2         | +2    | -        |
| mnCVID1001 85    | 4-34  | /    | /  | 6  | WRHYYYGMDV             | 10     | 1-39           | 2              | QQSYSTPRT    | 9      | +2         | +     | -        |
| mnCVID1001 102   | 1-3   | 2-15 | 2  | 5  | DRLSSGYCSGGSCYPTRYNWFD | 23     | 3-20           | 4              | QQYGSSPLT    | 9      | -          | +     | N        |
| mnCVID1001 118   | 4-34  | 1-7  | 2  | 5  | GGYNWNYDVLHYWFD        | 16     | 1-8            | 2              | QQYYSYPRT    | 9      | -          | -     | -        |
| mnCVID1001 119   | 3-21  | 3-10 | 2  | 4  | DGSNYGSGSYSPYYFDY      | 20     | 1-5            | 1              | QQYNSYPRT    | 9      | +2         | +     | -        |
| mnCVID1001 129   | 4-61  | 3-3  | 3  | 5  | DGGRITIFGVAPGWFD       | 17     | 1-39           | 1              | QQSYSTPLWT   | 10     | +2         | +     | -        |
| mnCVID1001 131   | 4-34  | 5-12 | 2  | 4  | VHRTYSGYDFDY           | 12     | 3-20           | 1              | QQYGSSLWT    | 9      | +          | +     | -        |
| mnCVID1001 134   | 3-23  | 3-3  | 2  | 4  | ANHDFWSGYGY            | 13     | 3-15           | 1              | QQYNNWPGT    | 9      | -          | -     | -        |
|                  | VH    | D    | RF | JH | CDR3 (aa)              | Length | V <sub>λ</sub> | J <sub>λ</sub> | CDR3 (aa)    | Length | Poly       | HEp-2 | Staining |
| mnCVID1001 04    | 4-34  | 3-3  | 1  | 5  | DGNSVLRFLWLGELWSFDP    | 20     | 2-11           | 1              | CSYAGSYIRV   | 10     | +2         | +2    | c        |
| mnCVID1001 53    | 3-30  | 2-21 | 3  | 4  | GAHIVVTAMSLMDY         | 15     | 3-21           | 2              | QVWSSSDHVV   | 11     | -          | -     | -        |
| mnCVID1001 55 #  | 3-73  | 3-3  | 2  | 6  | LSNYDFWVSGYGMV         | 14     | 3-21           | 3              | QVWSSSDPRGV  | 12     |            |       |          |
| mnCVID1001 103   | 4-34  | 6-19 | 1  | 5  | GRRIQWLVSWFD           | 13     | 2-23           | 3              | CSYAGSSTWV   | 10     | +2         | +     | N        |
| mnCVID1001 113   | 3-74  | /    | /  | 4  | GKGFY                  | 6      | 2-23           | 3              | CSYAGSSTWV   | 10     | -          | +     | -        |
| mnCVID1001 143   | 3-30  | 3-3  | 2  | 6  | EFYDFWVSGYFYGMV        | 15     | 2-23           | 1              | CSYAGSSTPYV  | 11     | +          | +     | -        |
| mnCVID1001 162 # | 4-34  | 3-3  | 1  | 4  | RRFLEWLLPPKREYFDY      | 18     | 1-51           | 2              | GTWSSSLSAV   | 11     |            |       |          |
| mnCVID1001 164   | 4-34  | 1-7  | 2  | 5  | GRIFLWVWYVWVWFD        | 18     | 2-14           | 2              | SSYTSSSTWV   | 10     | +2         | +2    | N        |
| mnCVID1001 166   | 3-66  | 6-13 | 3  | 4  | DPNTAAAGDY             | 10     | 1-47           | 1              | AAWDDSLSVHYV | 12     | -          | -     | -        |
|                  | VH    | D    | RF | JH | CDR3 (aa)              | Length | V              | J              | CDR3 (aa)    | Length | Poly       | HEp-2 | Staining |
| mnCVID1001 44    | 3-33  | 5-12 | 2  | 6  | ERFGYDYAYYGMV          | 15     |                |                |              |        |            |       |          |
| mnCVID1001 72    | 4-61  | /    | /  | 4  | DSIEWGDDY              | 9      |                |                |              |        |            |       |          |
| mnCVID1001 122   | 4-34  | 3-10 | 3  | 4  | VRGVIPTRGARYPWIDY      | 17     |                |                |              |        |            |       |          |
| mnCVID1001 57    | 4-4   | /    | /  | 4  | LGGQPFY                | 8      |                |                |              |        |            |       |          |
| mnCVID1001 60    | 4-34  | /    | /  | 5  | GRTYGSRGPWFD           | 13     |                |                |              |        |            |       |          |
| mnCVID1001 67    | 3-15  | 6-19 | 2  | 2  | AESGYSSGWYDWYFDL       | 16     |                |                |              |        |            |       |          |
| mnCVID1001 93    | 3-21  | /    | /  | 4  | TSDYSEDHDI             | 10     |                |                |              |        |            |       |          |
| mnCVID1001 123   | 4-34  | 5-5  | 3  | 4  | RDTRPFY                | 8      |                |                |              |        |            |       |          |
| mnCVID1001 169   | 3-33  | 5-24 | 2  | 4  | GDGYNAYFDY             | 11     |                |                |              |        |            |       |          |
| mnCVID1001 178   | 4-31  | 1-26 | 2  | 4  | RSGSYVDY               | 8      |                |                |              |        |            |       |          |

RF, reading frame; #, antibody failed to be expressed

-, non-reactive; +, reactive; +2, highly reactive

c, diffuse cytoplasmic staining; A, actin staining; G, Golgi staining; M, mitochondria staining; N, nuclear staining



**Supplemental Table 30.** Repertoire and reactivity of antibodies from mature naïve B cells of CVID patient C12.

| Ig             | HEAVY |      |    |    |                        |        | LIGHT |    |              |        | REACTIVITY |       |          |
|----------------|-------|------|----|----|------------------------|--------|-------|----|--------------|--------|------------|-------|----------|
|                | VH    | D    | RF | JH | CDR3 (aa)              | Length | Vk    | Jk | CDR3 (aa)    | Length | Poly       | HEp-2 | Staining |
| mnCVIDC12 02   | 1-18  | 6-19 | 2  | 6  | RALGSGWVGFYYGMDV       | 17     | 2-28  | 1  | MQALQTPQT    | 9      | +          | +2    | -        |
| mnCVIDC12 13   | 3-73  | 6-6  | 2  | 4  | LYSSSFDF               | 8      | 4-1   | 1  | QQY YSTPWT   | 10     | +2         | +2    | -        |
| mnCVIDC12 14 # | 4-31  | 3-3  | 2  | 5  | GCVDFWVSGYESSLLPWFD    | 18     | 3-15  | 4  | QQYNNWPNT    | 9      |            |       |          |
| mnCVIDC12 21   | 3-23  | 3-9  | 2  | 6  | DLTYDILTGYIPRDYYYYGMDV | 24     | 2-30  | 2  | MQGTHWP      | 7      | +          | +2    | -        |
| mnCVIDC12 24   | 4-61  | 3-10 | 2  | 4  | DFHSGIVDWWYVYD         | 15     | 1-39  | 1  | QQSYSTPRT    | 9      | +          | +2    | -        |
| mnCVIDC12 28   | 3-33  | 3-3  | 2  | 4  | DNGGFWSGYSGFYD         | 14     | 1-9   | 4  | QQLNSYLQGLT  | 11     | +          | +2    | -        |
| mnCVIDC12 29   | 3-23  | 3-22 | 2  | 4  | EPGSHYYDSSGYFFDY       | 16     | 3-11  | 5  | QQRSNWPKT    | 9      | -          | +     | -        |
| mnCVIDC12 31   | 4-31  | 3-22 | 2  | 5  | DSSSGAHNWFDP           | 12     | 3-15  | 2  | QQYGYT       | 7      | +          | +     | -        |
| mnCVIDC12 33   | 4-59  | 3-22 | 1  | 6  | SLLPTYYYGMDV           | 12     | 1-39  | 2  | QQSYSTPYT    | 9      | +          | +     | -        |
| mnCVIDC12 34   | 3-48  | 4-4  | 3  | 4  | DLPLSTVTYYFDY          | 13     | 1-39  | 1  | QQSYSTPWT    | 9      | -          | -     | -        |
| mnCVIDC12 36   | 3-33  | 4-17 | 2  | 5  | DLPYGDYDGGSW           | 12     | 4-1   | 1  | QQYYSTPPT    | 9      | -          | -     | -        |
| mnCVIDC12 37   | 3-23  | 3-10 | 1  | 4  | DYLLWFGESEPFYD         | 14     | 3-15  | 3  | QQYNNWPLT    | 9      | -          | -     | -        |
| mnCVIDC12 52   | 4-31  | 3-22 | 2  | 4  | SDYYDSSGYFFPDY         | 14     | 1-17  | 1  | LQHNSYPPT    | 9      |            |       |          |
| mnCVIDC12 53   | 4-59  | 5-5  | 2  | 4  | GGATWSYED              | 9      | 3-15  | 4  | QQYNNWPLT    | 9      |            |       |          |
| mnCVIDC12 54   | 3-74  | 1-26 | 2  | 4  | PLYSGSYYY              | 9      | 3-20  | 1  | QQYGSSPWT    | 9      |            |       |          |
| mnCVIDC12 55   | 5-51  | 3-22 | 2  | 4  | TPQYYDSSGYFVDY         | 14     | 1-9   | 4  | QQLTLT       | 7      |            |       |          |
| mnCVIDC12 56   | 3-74  | /    | /  | 4  | DAVQGAQRDY             | 10     | 2-28  | 4  | MQALQTPLT    | 9      |            |       |          |
| mnCVIDC12 65   | 3-7   | 5-5  | 3  | 5  | NTAMANG                | 7      | 3-15  | 3  | QQYNNWLF     | 9      |            |       |          |
| mnCVIDC12 67   | 3-30  | 3-9  | 2  | 3  | DKAYDILTAHAFDI         | 14     | 1-5   | 1  | QQYNSYPRT    | 9      |            |       |          |
| mnCVIDC12 69   | 3-30  | 2-8  | 3  | 3  | DRLALVYATPNAFDI        | 16     | 1-5   | 1  | QQYNSYSPWT   | 10     |            |       |          |
|                | VH    | D    | RF | JH | CDR3 (aa)              | Length | Vk    | Jk | CDR3 (aa)    | Length | Poly       | HEp-2 | Staining |
| mnCVIDC12 12   | 1-2   | 6-13 | 2  | 6  | RDSHPTGSSSFGLQPMVDV    | 20     | 3-1   | 1  | QAWDSSTVV    | 9      | -          | +     | -        |
| mnCVIDC12 19   | 3-7   | 2-2  | 3  | 4  | VGRRVVPADFY            | 12     | 2-11  | 3  | CSYAGSYTLDDV | 12     | -          | -     | -        |
| mnCVIDC12 26   | 3-33  | 1-26 | 2  | 4  | DRPDMGGSYLNAPDY        | 15     | 7-43  | 3  | LLYYGGAQPWW  | 11     | +          | +     | -        |
| mnCVIDC12 40   | 4-39  | /    | /  | 4  | DDPKEHTRQFRH           | 12     | 3-21  | 3  | QVWSSSDHL    | 10     | -          | +     | N        |
| mnCVIDC12 45   | 3-43  | /    | /  | 6  | DFHRFIGPTYGMDV         | 14     | 3-1   | 3  | QAWSSSILV    | 9      | -          | -     | c        |
| mnCVIDC12 47   | 3-30  | 6-13 | 3  | 4  | DLLGVAAGPEHYFDY        | 17     | 2-14  | 3  | SSYTSSTPVV   | 11     | -          | -     | -        |
| mnCVIDC12 48   | 1-69  | 3-16 | 2  | 4  | ASRVYDYVWGSFREPPIHFDY  | 20     | 1-40  | 3  | QSYDSSLSGLV  | 11     | +          | +     | N        |
| mnCVIDC12 63 # | 5-51  | 4-4  | 2  | 4  | RLEFGNYLQPFYD          | 13     | 2-14  | 3  | SSYTSSTLV    | 10     |            |       |          |
| mnCVIDC12 68 # | 3-23  | 3-22 | 2  | 6  | DLNYYDSSGYPHDGMVDV     | 17     | 1-40  | 1  | QSYDSSLSGRV  | 11     |            |       |          |
| mnCVIDC12 08   | 3-30  | /    | /  | 5  |                        |        | 1-44  | 3  | AAWDDLSLV    | 10     | -          | -     | -        |
| mnCVIDC12 23   | 3-21  | 6-19 | 2  | 4  |                        |        | 2-14  | 3  | SSYTSSSNVV   | 10     |            |       |          |
|                | VH    | D    | RF | JH | CDR3 (aa)              | Length | V     | J  | CDR3 (aa)    | Length | Poly       | HEp-2 | Staining |
| mnCVIDC12 35   | 3-23  | /    | /  | 6  | EEGALPYYYGMDV          | 14     |       |    |              |        |            |       |          |

RF, reading frame; #, antibody failed to be expressed

-, non-reactive; +, reactive; +2, highly reactive

c, diffuse cytoplasmic staining; A, actin staining; G, Golgi staining; M, mitochondria staining; N, nuclear staining

**Supplemental Table 31.** Repertoire and reactivity of antibodies from mature naïve B cells of CVID patient 218.

| Ig             | HEAVY  |      |    |    |                       |        | LIGHT          |                |              |        | REACTIVITY |       |          |
|----------------|--------|------|----|----|-----------------------|--------|----------------|----------------|--------------|--------|------------|-------|----------|
|                | VH     | D    | RF | JH | CDR3 (aa)             | Length | V <sub>k</sub> | J <sub>k</sub> | CDR3 (aa)    | Length | Poly       | HEp-2 | Staining |
| mnCVID218 07   | 1-18   | 6-13 | 2  | 6  | DPGELYSSSWQWPYYGMDV   | 20     | 3-20           | 4              | QQYGSSPPALT  | 11     | -          | +2    | c        |
| mnCVID218 08 # | 4-30   | 4-17 | 2  | 3  | DRRGDYGDYVGGAKDDAFDI  | 20     | 2D-29          | 1              | MQSIQLPT     | 8      |            |       |          |
| mnCVID218 10   | 1-18   | /    | /  | 6  | DTPRQYYYYGMDV         | 13     | 2D-29          | 2              | MQSIQLPRT    | 9      | -          | +     | -        |
| mnCVID218 11   | 3-23   | 3-22 | 2  | 6  | FYYDSSGYNNYYYYGMDV    | 19     | 1-9            | 3              | QQLNSYEGFLT  | 11     | +          | +2    | c        |
| mnCVID218 20   | 1-3    | 6-6  | 2  | 4  | EYSSSSDY              | 8      | 1-39           | 1              | QQSYSTPRT    | 9      | -          | +     | -        |
| mnCVID218 26   | 3-30   | 3-3  | 3  | 4  | DRQFGVVPNYFDY         | 13     | 3-15           | 1              | QQYNNWPPWGT  | 11     | -          | -     | -        |
| mnCVID218 29 # | 4-39   | 3-3  | 2  | 4  | FYYDFWSGTTYGFDY       | 15     | 2-28           | 2              | MQALQTPYT    | 9      |            |       |          |
| mnCVID218 30   | 3-23   | 5-24 | 3  | 4  | GGMATIKVLNFDY         | 13     | 1-39           | 1              | QQSYSTPPT    | 9      | -          | -     | -        |
| mnCVID218 31   | 3-7    | 1-26 | 3  | 4  | GGVVGAPPPYQNRLDY      | 16     | 1-33           | 4              | QQYDNLPLT    | 9      | -          | -     | -        |
| mnCVID218 33   | 1-46   | 6-19 | 2  | 4  | DLAGGWTSY             | 9      | 2-30           | 4              | MQGTHWPPLT   | 10     | -          | -     | -        |
| mnCVID218 34   | 4-34   | 2-2  | 1  | 4  | GLYQLLFFFDY           | 11     | 1-39           | 1              | QQSYSTRT     | 8      | +          | +2    | -        |
| mnCVID218 35   | 4-61   | 3-22 | 2  | 3  | SFFSGYLLDAFDI         | 13     | 1-8            | 2              | QQYYSYPYT    | 9      | +          | +2    | -        |
| mnCVID218 43   | 3-23   | 6-19 | 1  | 4  | DQWRLVSGSIDY          | 12     | 3-15           | 1              | QQYNNWPPWT   | 10     | -          | +2    | -        |
| mnCVID218 45   | 3-33   | 6-13 | 1  | 4  | GQLATFDY              | 8      | 1-39           | 2              | QQSYSTSYP    | 9      | -          | +     | -        |
| mnCVID218 46 # | 3-43   | /    | /  | 4  | WRI                   | 3      | 2-28           | 2              | MQALQTPYT    | 9      |            |       |          |
| mnCVID218 47   | 4-30-4 | 2-8  | 2  | 4  | GYCTNGVCYKPYFDY       | 16     | 1-39           | 2              | QQSYSTPNT    | 9      | -          | +     | -        |
| mnCVID218 44   |        |      |    |    |                       |        | 1-39           | 5              | QQSYSTPIT    | 9      |            |       |          |
|                | VH     | D    | RF | JH | CDR3 (aa)             | Length | V <sub>λ</sub> | J <sub>λ</sub> | CDR3 (aa)    | Length | Poly       | HEp-2 | Staining |
| mnCVID218 01   | 1-69   | 6-19 | 2  | 5  | YSSGWSNWFDP           | 11     | 1-51           | 1              | GTWDSLSADV   | 11     | +2         | +2    | -        |
| mnCVID218 03 # | 1-69   | 2-15 | 2  | 6  | EIDCSGGSCYFVHYYYYGMDV | 21     | 2-23           | 2              | CSYAGSSTFWV  | 11     |            |       |          |
| mnCVID218 13   | 4-34   | 6-13 | 2  | 4  | GPTRRRSSWDNPFYD       | 15     | 1-47           | 1              | AAWDDSLSGPCV | 12     | +2         | +2    | N        |
| mnCVID218 38   | 4-59   | 3-3  | 2  | 2  | APPSDFWSGYTHWYFDL     | 18     | 1-44           | 3              | AAWDDSLRGV   | 10     | +2         | +     | -        |
| mnCVID218 40 # | 1-69   | 2-2  | 2  | 5  | EGLRYCGDCSPGGGRFDP    | 19     | 1-39           | 4              | QQSYSTTLT    | 9      |            |       |          |
| mnCVID218 41   | 1-18   | 1-26 | 2  | 5  | DQGGSYLLGPPWFDP       | 15     | 2-14           | 2              | SSYSSSTLEGV  | 12     | -          | -     | -        |
| mnCVID218 42   | 3-66   | /    | /  | 6  | DRDPSPYGMDV           | 11     | 2-8            | 1              | SSYAGSNPYV   | 10     | -          | -     | -        |
| mnCVID218 43   |        |      |    |    | see kappa             |        | 2-8            | 3              | SSYAGSNLNV   | 10     | +          | -     | -        |
| mnCVID218 09   |        |      |    |    |                       |        | 3-1            | 3              | QAWDSSAFVW   | 11     |            |       |          |
| mnCVID218 15   |        |      |    |    |                       |        | 3-1            | 2              | QAWDSSAVVW   | 11     |            |       |          |
| mnCVID218 23   |        |      |    |    |                       |        | 1-40           | 2              | QSYDSSLSVW   | 10     |            |       |          |
|                | VH     | D    | RF | JH | CDR3 (aa)             | Length | V              | J              | CDR3 (aa)    | Length | Poly       | HEp-2 | Staining |
| mnCVID218 14   | 4-34   | 6-19 | 3  | 4  | RGTKYRAVAGHFDY        | 14     |                |                |              |        |            |       |          |
| mnCVID218 12   | 1-18   | 2-2  | 2  | 4  | GGYCSSTSCQNVDTAMVNFYD | 21     |                |                |              |        |            |       |          |
| mnCVID218 17   | 3-66   | 3-3  | 2  | 6  | ADFWSGYYYYYGMDV       | 14     |                |                |              |        |            |       |          |
| mnCVID218 27   | 3-30-3 | 3-10 | 2  | 4  | GYGSGSNYYFDY          | 12     |                |                |              |        |            |       |          |
| mnCVID218 28   | 3-74   | 3-16 | 2  | 6  | VVWGLDSGSYFLYYYYYMDV  | 20     |                |                |              |        |            |       |          |
|                |        | 1-26 | 2  |    |                       |        |                |                |              |        |            |       |          |
| mnCVID218 48   | 1-69   | 3-9  | 1  | 4  | DRYRRYFDWLWVY         | 13     |                |                |              |        |            |       |          |

RF, reading frame; #, antibody failed to be expressed

-, non-reactive; +, reactive; +2, highly reactive

c, diffuse cytoplasmic staining; A, actin staining; G, Golgi staining; M, mitochondria staining; N, nuclear staining

**Supplemental Table 32.** Repertoire and reactivity of antibodies from mature naïve B cells of CVID patient 251.

| Ig             | HEAVY |      |    |    |                            | LIGHT  |                |                |               | REACTIVITY |      |       |          |
|----------------|-------|------|----|----|----------------------------|--------|----------------|----------------|---------------|------------|------|-------|----------|
|                | VH    | D    | RF | JH | CDR3 (aa)                  | Length | V <sub>κ</sub> | J <sub>κ</sub> | CDR3 (aa)     | Length     | Poly | HEp-2 | Staining |
| mnCVID251 01   | 3-9   | /    | /  | 6  | AKDIWTGSYYYYGMDV           | 16     | 1-39           | 1              | QQSYSTPLT     | 9          | -    | +     | c        |
| mnCVID251 04   | 4-4   | 3-3  | 2  | 6  | AREDFWSGYYLALSYYGMDV       | 20     | 3-11           | 4              | QQRSNWPRT     | 9          | +2   | +2    | c        |
| mnCVID251 05   | 4-39  | 6-13 | 2  | 4  | ASGPRSSWYHGIFYDY           | 15     | 3-15           | 1              | QQYNNWPRT     | 9          | +    | -     | -        |
| mnCVID251 07   | 1-69  | 6-19 | 3  | 1  | ATHSYTTIAVAGTHFQH          | 17     | 1-39           | 4              | QQSYSTPLT     | 9          | +    | +     | c        |
| mnCVID251 10   | 3-73  | 1-7  | 3  | 4  | TTGTSYRIDY                 | 10     | 3-20           | 4              | QQYGSSLT      | 8          | -    | +     | -        |
| mnCVID251 12   | 4-34  | 3-16 | 1  | 2  | ARCKKRLGKRIGSWYFDL         | 19     | 3-20           | 5              | QQYGSSPPIT    | 10         | +2   | +2    | N+c      |
| mnCVID251 14 # | 3-43  | 6-19 | 3  | 6  | AKDLGPLAVAGTAYYYGMDV       | 20     | 2D-29          | 1              | MQSIQLPWT     | 9          |      |       |          |
| mnCVID251 16   | 3-7   | 2-8  | 3  | 6  | ARDKDIVLNEDGDYFYYGMDV      | 21     | 3-11           | 5              | QQRSNWPPIT    | 10         | -    | -     | -        |
| mnCVID251 17   | 1-46  | /    | /  | 4  | ARVPLTADEAPWVNGDY          | 17     | 3-15           | 3              | QQYNNWPWGFT   | 11         | +    | +     | -        |
| mnCVID251 19   | 3-53  | 2-15 | 2  | 4  | ARVRYCSGGSCYSAPWVDY        | 19     | 3-15           | 1              | QQYNNWPLT     | 9          | +    | +     | N+c      |
| mnCVID251 20   | 1-3   | 3-22 | 2  | 4  | AREGGYYDSSTYDY             | 15     | 1-39           | 2              | QQSYSTRRWS    | 10         | -    | +     | c        |
| mnCVID251 24   | 4-39  | 3-10 | 1  | 6  | ARHNSRQLLWFGELLYKGDYWGVMGV | 27     | 1-33           | 4              | QQYDNLPLT     | 9          | +    | -     | -        |
| mnCVID251 28   | 3-33  | 5-5  | 2  | 6  | ASDPGYSYGFVYYYGMDV         | 18     | 1-39           | 3              | QQSYSTPPR     | 9          | +    | +     | N+c      |
| mnCVID251 29   | 3-64  | 3-22 | 2  | 4  | VKEYYYDSSGYDY              | 14     | 1-39           | 2              | QQSYSTQYT     | 9          | -    | -     | -        |
| mnCVID251 32   | 4-4   | 6-19 | 2  | 4  | ARKAYSSGWYFDY              | 13     | 1-39           | 4              | QQSYSTPLT     | 9          | -    | -     | -        |
| mnCVID251 33   | 1-69  | 3-10 | 2  | 6  | ARSRREYSGSGYYPLPYYYYGMDV   | 27     | 3-11           | 5              | QQRSNWPIT     | 9          | +    | +     | -        |
| mnCVID251 37   | 1-58  | 3-22 | 2  | 6  | AASYYYDSSGYVVDYGGMDV       | 21     | 3D-15          | 1              | QQYNNWPPWT    | 10         | -    | +     | -        |
| mnCVID251 38   | 1-69  | 4-23 | 2  | 4  | ARDLSGGNSEAYFDY            | 15     | 3-15           | 1              | QQYNNWPPWT    | 10         | +    | +     | -        |
| mnCVID251 40   | 5-51  | 3-10 | 1  | 4  | ARGGWFGGTRYFDY             | 15     | 3-11           | 4              | QQRSNWPPGVT   | 11         | +2   | +     | c        |
|                | VH    | D    | RF | JH | CDR3 (aa)                  | Length | V <sub>λ</sub> | J <sub>λ</sub> | CDR3 (aa)     | Length     | Poly | HEp-2 | Staining |
| mnCVID251 02   | 3-9   | 3-22 | 2  | 4  | AKDPVAYYDSSGYFDY           | 17     | 3-21           | 3              | QVWDSDDLRLV   | 11         | -    | -     | -        |
| mnCVID251 03   | 1-69  | 2-15 | 2  | 5  | ARDCSGGSCYSGNWFDP          | 17     | 3-16           | 3              | LSADSSGTYPV   | 11         | +    | -     | -        |
| mnCVID251 06   | 3-7   | 3-9  | 1  | 4  | ARDFDLHDY                  | 9      | 1-40           | 2              | QSYDSSLGTV    | 11         | -    | -     | -        |
| mnCVID251 11   | 3-9   | 1-1  | 2  | 3  | AKDLVMWNGAGVAFDI           | 16     | 2-11           | 2              | CSYAGSYSF     | 9          | -    | -     | -        |
| mnCVID251 13   | 4-34  | 2-2  | 3  | 4  | ARNIVLPTHQTEAYYFDY         | 19     | 2-8            | 1              | SSYAGSNLTV    | 11         | -    | -     | -        |
| mnCVID251 15   | 3-15  | 3-22 | 2  | 4  | TTDPEKSEYYDSSGYRTPAY       | 21     | 3-25           | 3              | QSADSSGTFVW   | 11         | -    | +     | -        |
| mnCVID251 18   | 3-30  | 5-5  | 2  | 4  | AKDRIGYSYSGSIDY            | 15     | 1-44           | 3              | AAWDDSLNGWV   | 11         | -    | -     | -        |
| mnCVID251 25   | 3-7   | 3-3  | 2  | 6  | ARDCYDFWGSPEPRMDV          | 18     | 1-47           | 2              | AAWDDSLSGHVV  | 12         | -    | -     | -        |
| mnCVID251 27   | 3-66  | 3-10 | 2  | 4  | ARDLGYHEQEQQYGSSEN         | 17     | 1-47           | 1              | AAWDDSLSGPFVY | 13         | -    | -     | -        |
| mnCVID251 30   | 3-73  | /    | /  | 4  | TRSPRVGDFDY                | 11     | 2-23           | 1              | CSYAGFTWV     | 9          | +    | +     | N+c      |
| mnCVID251 35   | 3-20  | /    | /  | 5  | ARDMGGWFDP                 | 10     | 1-51           | 3              | GTWDDSLSVWV   | 11         | -    | -     | -        |
| mnCVID251 36   | 3-23  | 1-7  | 2  | 4  | AKDRHNWNYYY                | 11     | 3-27           | 2              | YSAADNNLV     | 9          | +    | +     | N+c      |
| mnCVID251 45   |       |      |    |    |                            |        | 1-44           | 1              | AAWDDSLNGYV   | 11         |      |       |          |
| mnCVID251 47   |       |      |    |    |                            |        | 3-1            | 1              | QAWDSSNYV     | 9          |      |       |          |
|                | VH    | D    | RF | JH | CDR3 (aa)                  | Length | V              | J              | CDR3 (aa)     | Length     | Poly | HEp-2 | Staining |
| mnCVID251 39   | 1-2   | 5-5  | 3  | 4  | ARGGNVDTAMVEDY             | 14     |                |                |               |            |      |       |          |

RF, reading frame; #, antibody failed to be expressed

-, non-reactive; +, reactive; +2, highly reactive

c, diffuse cytoplasmic staining; A, actin staining; G, Golgi staining; M, mitochondria staining; N, nuclear staining

**Supplemental Table 33.** Repertoire and reactivity of antibodies from mature naive B cells of CVID patient 170.

| Ig             | HEAVY |      |    |    |                          |        | LIGHT |    |                |        | REACTIVITY |       |          |
|----------------|-------|------|----|----|--------------------------|--------|-------|----|----------------|--------|------------|-------|----------|
|                | VH    | D    | RF | JH | CDR3 (aa)                | Length | Vk    | Jk | CDR3 (aa)      | Length | Poly       | HEp-2 | Staining |
| mnCVID170 01   | 3-9   | /    | /  | 6  | SSGYGGNYGMDV             | 12     | 1-27  | 1  | QKYNAPWT       | 9      | -          | -     | -        |
| mnCVID170 04   | 3-23  | 6-13 | 3  | 4  | ASPRGALIAAAGYFDY         | 16     | 1-9   | 3  | QQLNSYPPVT     | 10     | +          | +     | N+c      |
| mnCVID170 09   | 3-33  | /    | /  | 3  | ARDKGTVSAFDI             | 12     | 4-1   | 2  | QQYYSTPYT      | 9      | +          | -     | -        |
| mnCVID170 17   | 4-34  | 5-24 | 1  | 4  | ARAPPFSRWLQLSYFDY        | 17     | 3-11  | 2  | QQRSNWPT       | 8      | +2         | +     | c        |
| mnCVID170 21   | 4-34  | 3-22 | 3  | 5  | ARGMITMIVVAHNWFDP        | 17     | 1-39  | 2  | QQSYSTPYT      | 9      | +          | -     | c        |
| mnCVID170 22   | 4-34  | 3-16 | 2  | 4  | DTIHNYGYFDY              | 11     | 1-5   | 2  | QQYNSYPYT      | 9      | -          | -     | -        |
| mnCVID170 26   | 3-21  | 2-2  | 2  | 4  | ARSTYCSSTSCLFDY          | 16     | 1-5   | 2  | QQYNSYPYT      | 9      | -          | -     | -        |
| mnCVID170 27   | 3-30  | 6-19 | 3  | 4  | AKDPLPVARSAYYFDY         | 16     | 1-12  | 5  | QQANSFPIT      | 9      | +          | +     | -        |
| mnCVID170 31   | 3-33  | 3-22 | 2  | 4  | ARPLGYDSSGYLGGPGIDY      | 22     | 3-20  | 4  | QQYSSPPLT      | 10     | +          | +     | N+c      |
| mnCVID170 37   | 1-18  | 1-26 | 2  | 6  | ARDSSGSFAGYGGYGGMDV      | 18     | 2-24  | 2  | MQATQFPYT      | 9      | -          | -     | -        |
| mnCVID170 38   | 4-34  | 3-10 | 2  | 6  | ARGPPTTYYYGSGRLRGMDV     | 20     | 1-9   | 4  | QQLNSYPLT      | 9      | +          | -     | -        |
| mnCVID170 39 # | 4-61  | /    | /  | 5  | ARDGGYKDWFDP             | 12     | 1-37  | 5  | QRTYNAPHP      | 9      |            |       |          |
| mnCVID170 41   | 3-9   | 6-6  | 2  | 4  | AKDPSSSSGLC              | 11     | 4-1   | 1  | QQYYSTPWT      | 9      | -          | -     | -        |
| mnCVID170 42   | 4-34  | 2-2  | 3  | 6  | ARGVPHIVVPAASLYGMDV      | 20     | 1-17  | 1  | LQHNSYPRT      | 9      | +          | +     | N+c      |
| mnCVID170 44   | 3-9   | 1-26 | 3  | 5  | AKDISVGVGALGT            | 12     | 2-28  | 3  | MQALQTPRT      | 9      | -          | -     | -        |
| mnCVID170 46   | 1-18  | 1-26 | 3  | 4  | ARVEQVGTAGADY            | 13     | 1D-8  | 3  | QQYYSFPT       | 8      | -          | -     | -        |
| mnCVID170 03 # |       |      |    |    |                          |        | 3-11  | 1  | QQRSNWPPGT     | 10     |            |       |          |
|                | VH    | D    | RF | JH | CDR3 (aa)                | Length | Vk    | Jk | CDR3 (aa)      | Length | Poly       | HEp-2 | Staining |
| mnCVID170 08 # | 3-30  | 3-3  | 3  | 4  | ARDPRRITIFGVVITIRFQFDY   | 22     | 9-49  | 2  | GADHGSGSNFVSKV | 14     |            |       |          |
| mnCVID170 10 # | 3-9   | 6-13 | 3  | 4  | AKDSLAAAGRIDY            | 13     | 1-40  | 3  | QSYDSSLSGVV    | 11     |            |       |          |
| mnCVID170 14   | 3-21  | 6-13 | 3  | 1  | ARDKREAAAEPEYFQH         | 16     | 2-14  | 2  | SSYTSSSTLV     | 10     | -          | -     | -        |
| mnCVID170 15   | 1-8   | 3-3  | 3  | 5  | ARGNRPPRITIFGVVIRTQNWFDP | 24     | 2-8   | 2  | SSYAGSNVNV     | 10     | +2         | +     | c        |
| mnCVID170 18   | 1-8   | 6-13 | 3  | 4  | ASRIAAAGTEDY             | 12     | 3-1   | 1  | QAWDSGYV       | 8      | -          | -     | -        |
| mnCVID170 19   | 3-23  | 2-8  | 3  | 4  | AKDHGGYIVLDHFDY          | 15     | 6-57  | 7  | QSYDSSNAV      | 9      | -          | -     | -        |
| mnCVID170 20   | 4-30  | 3-22 | 2  | 4  | AREGGYYEIDY              | 12     | 1-51  | 3  | GTWDSLSVGV     | 11     | -          | -     | -        |
| mnCVID170 21   |       |      |    |    | see kappa                |        | 1-47  | 2  | AAWDDSLGHVV    | 12     | +          | +     | N+c      |
| mnCVID170 22   |       |      |    |    | see kappa                |        | 1-44  | 3  | AAWDDSLNGVV    | 11     | -          | -     | -        |
| mnCVID170 25   | 4-34  | 5-12 | 2  | 4  | GHYSGYDWGIDY             | 12     | 1-47  | 3  | AAWDDSLSGRV    | 11     | +          | -     | -        |
| mnCVID170 32   | 1-46  | /    | /  | 6  | ARDLLVDPYYYYGMDV         | 17     | 3-25  | 2  | QSADSSGTYRV    | 11     | -          | -     | -        |
| mnCVID170 39   | 4-59  | /    | /  | 5  | DGGYKDWFDP               | 10     | 3-1   | 1  | QAWDSSTFYV     | 10     | -          | -     | -        |
| mnCVID170 40   | 3-7   | 3-3  | 2  | 4  | AKDIKDDFWSGEYFDY         | 18     | 3-1   | 2  | QAWDSSTV       | 9      | -          | -     | -        |
| mnCVID170 43   | 1-2   | 6-13 | 2  | 5  | ARDHRRGSSSWYRAGNNWFDP    | 21     | 2-23  | 2  | CSYAGSSTFDVV   | 12     | +2         | +2    | N        |
| mnCVID170 47   | 4-34  | 2-15 | 2  | 4  | ARGASDSSYCSGGSCYSIDY     | 20     | 2-14  | 1  | SSYTSSSTPYV    | 11     | -          | -     | -        |
| mnCVID170 34   |       |      |    |    |                          |        | 2-8   | 3  | SSYAGSNNRV     | 10     |            |       |          |
|                | VH    | D    | RF | JH | CDR3 (aa)                | Length | V     | J  | CDR3 (aa)      | Length | Poly       | HEp-2 | Staining |
| mnCVID170 13   | 4-34  | 1-26 | 2  | 5  | AREGGSYLLDWFDP           | 14     |       |    |                |        |            |       |          |
| mnCVID170 30   | 4-59  | /    | /  | 4  | ARASGVPTFDY              | 11     |       |    |                |        |            |       |          |
| mnCVID170 41   |       |      |    |    | see kappa                |        |       |    |                |        |            |       |          |

RF, reading frame; #, antibody failed to be expressed

-, non-reactive; +, reactive; +2, highly reactive

c, diffuse cytoplasmic staining; A, actin staining; G, Golgi staining; M, mitochondria staining; N, nuclear staining

**Supplemental Table 34.** Repertoire and reactivity of antibodies from mature naive B cells of CVID patient 124.

| Ig             | HEAVY  |       |    |    |                          |        | LIGHT          |                |             |        | REACTIVITY |       |          |
|----------------|--------|-------|----|----|--------------------------|--------|----------------|----------------|-------------|--------|------------|-------|----------|
|                | VH     | D     | RF | JH | CDR3 (aa)                | Length | V <sub>k</sub> | J <sub>k</sub> | CDR3 (aa)   | Length | Poly       | HEp-2 | Staining |
| mnCVID124 01   | 4-34   | 1-26  | 3  | 5  | ARSLRIVGAAKIGWFDP        | 17     | 3-20           | 1              | QQYGSSPWT   | 9      | -          | -     | -        |
| mnCVID124 03   | 4-34   | 3-3   | 2  | 4  | ARDYRRYYDFWVGKGGYFDY     | 20     | 3-20           | 1              | QQYGSSPGT   | 9      | +          | +     | c        |
| mnCVID124 14   | 4-34   | 3-3   | 1  | 4  | ARGDPDSLRFLEWLRETGACYFDY | 24     | 3-20           | 2              | QQYGSSPGT   | 9      | -          | +     | c        |
| mnCVID124 17   | 3-33   | 6-6   | 3  | 4  | ARSPRRSSIAARPPYFDY       | 19     | 3-20           | 5              | QQYGSSLIT   | 9      | +          | +     | N+c      |
| mnCVID124 19   | 1-69   | 6-13  | 3  | 4  | ARDRPPYGAAGRAFDY         | 18     | 3-11           | 4              | QQRSNWPPVLT | 11     | -          | +     | c        |
| mnCVID124 27   | 4-34   | 4-4   | 2  | 4  | ARGYSKWDSYFDY            | 13     | 3-20           | 1              | QQYGSSPKT   | 9      | -          | -     | -        |
| mnCVID124 30   | 3-21   | 1-7   | 2  | 5  | ARDNWSSGWT               | 10     | 1-33           | 1              | QQYDNLPT    | 9      | -          | -     | -        |
|                |        | 6-19  | 2  |    |                          |        |                |                |             |        |            |       |          |
| mnCVID124 31   | 4-34   | 1-1   | 2  | 4  | ARRYNWDEYFDY             | 13     | 3-11           | 1              | QQRSNWSPWT  | 10     | +          | -     | -        |
| mnCVID124 34   | 4-34   | 3-10  | 2  | 4  | ARGRNYGSGSYIIRY          | 16     | 3-20           | 1              | QQYGSSPPWT  | 10     | +          | +     | -        |
| mnCVID124 36   | 4-34   | 5-12  | 2  | 4  | ARGLTGGYSGYVLYYFDY       | 21     | 3-11           | 3              | QQRSNWPPT   | 9      | +          | +     | -        |
| mnCVID124 42   | 3-15   | 2-2   | 3  | 4  | TTGMLVPAAMGGGRNY         | 17     | 3-20           | 4              | QQYGSSPLT   | 9      | -          | -     | -        |
| mnCVID124 45   | 4-39   | 3-22  | 3  | 5  | ARHSRMIVVVIKAPNWFDP      | 20     | 3-20           | 4              | QQYGSSPLT   | 9      | +2         | +     | c        |
| mnCVID124 47 # | 4-34   | 3-16  | 3  | 4  | ARARFAGAVGGVLDY          | 15     | 3-20           | 1              | QQYGSSPRRT  | 10     |            |       |          |
|                |        | 6-19  | 3  |    |                          |        |                |                |             |        |            |       |          |
| mnCVID124 50   | 1-69   | 2-2   | 1  | 6  | ASERGWEYQALTYGMDV        | 19     | 3-20           | 1              | QQYGSSPPWT  | 10     | +          | +     | -        |
| mnCVID124 52   | 4-34   | 6-3-5 | 2  | 4  | ASPQSSGS                 | 9      | 3-20           | 1              | QQYGSSPRT   | 9      | -          | +     | -        |
| mnCVID124 55   | 4-34   | 3-3   | 3  | 5  | ARGPNRITIFGVGKGFDP       | 19     | 3-20           | 1              | QQYGSSPRT   | 9      | +          | +     | -        |
| mnCVID124 56   | 4-39   | 3-3   | 2  | 4  | ARQGYDFWSGYSYFDY         | 16     | 3-20           | 1              | QQYGSSPGT   | 9      | -          | +     | c        |
| mnCVID124 57   | 4-31   | 6-6   | 2  | 6  | ARNSYSSSGVSYYYGMDV       | 19     | 4-1            | 1              | QQYYSTPWT   | 9      | -          | +     | -        |
| mnCVID124 58 # | 3-49   | 6-19  | 3  | 4  | ARDRRGPGAADV             | 14     | 3-15           | 1              | QQYNNWPPWT  | 10     |            |       |          |
| mnCVID124 59 # | 4-31   | 3-16  | 2  | 5  | AGSKAYVWGSRGWFDP         | 16     | 3-20           | 2              | QQYGSSPGYT  | 10     |            |       |          |
| mnCVID124 61 # | 3-30   | 2-15  | 2  | 4  | AKWGGGSCYFDY             | 12     | 3-15           | 4              | QQYNNWPLT   | 9      |            |       |          |
| mnCVID124 67   | 3-64   | 6-19  | 2  | 4  | VKGGYSSGWQTRFDY          | 16     | 3-15           | 2              | QQYNNWPRDT  | 10     | +2         | -     | -        |
| mnCVID124 69 # | 4-34   | 2-2   | 3  | 5  | ARSISPALTDGGVPAAMANWFDP  | 24     | 1-39           | 1              | QQSYSTPRT   | 9      |            |       |          |
| mnCVID124 70   | 3-33   | 3-10  | 2  | 4  | AREHYGSGIGGKPPDY         | 17     | 1-5            | 2              | QQYNSYSYT   | 9      | -          | +     | N+c      |
| mnCVID124 72 # | 3-23   | 3-9   | 2  | 4  | AKDIGSYDLTGYSLFDY        | 19     | 3-20           | 2              | QQYGSSPRYT  | 10     |            |       |          |
| mnCVID124 74 # | 1-69   | 6-13  | 2  | 4  | ARVGSWYDGFWDY            | 14     | 3-20           | 1              | QQYGSSPWT   | 9      |            |       |          |
| mnCVID124 90 # | 3-23   | 6-6   | 2  | 4  | AKEGVSAAEYSSLSVDY        | 17     | 3-11           | 4              | QQRSNWPLT   | 9      |            |       |          |
| mnCVID124 91 # | 3-30   | 1-26  | 1  | 1  | AKVAPWFALLGGGYFQH        | 18     | 3-20           | 4              | QQYGSSPLT   | 9      |            |       |          |
| mnCVID124 92 # | 4-34   | 6-6   | 2  | 5  | ARGYGEYSSSQGVTS          | 15     | 3-20           | 1              | QQYGSSRWT   | 9      |            |       |          |
| mnCVID124 93 # | 3-73   | 2-15  | 2  | 3  | TSSGGIFRI                | 9      | 1-5            | 1              | QQYNSMGA    | 8      |            |       |          |
| mnCVID124 94 # | 4-34   | 6-6   | 3  | 4  | ASFGSRARPSYFDY           | 15     | 3-20           | 1              | QQYGSSPRT   | 9      |            |       |          |
| mnCVID124 95   | 1-69   | 6-13  | 2  | 6  | ARSAGELSSSHSYYYYGMDV     | 21     | 1-33           | 4              | QQYDNLPLT   | 9      | +          | +     | -        |
|                | VH     | D     | RF | JH | CDR3 (aa)                | Length | V <sub>λ</sub> | J <sub>λ</sub> | CDR3 (aa)   | Length | Poly       | HEp-2 | Staining |
| mnCVID124 19   |        |       |    |    | see kappa                |        | 2-8            | 2              | SSYAGSNNAVV | 11     | +2         | -     | -        |
| mnCVID124 32 # | 1-69   | 1-26  | 2  | 4  | ARAVGSYLIDY              | 11     | 4-69           | 2              | QTWGTGMEV   | 9      |            |       |          |
| mnCVID124 55   |        |       |    |    | see kappa                |        | 2-14           | 2              | SSYSSSTVW   | 10     | +2         | -     | c        |
| mnCVID124 72   |        |       |    |    | see kappa                |        | 1-47           | 2              | AAWDDSLSGVV | 11     | -          | -     | -        |
| mnCVID124 91 # |        |       |    |    | see kappa                |        | 1-40           | 2              | QSYDSSLGVV  | 11     |            |       |          |
| mnCVID124 134  | 1-69   | 6-6   | 2  | 3  | ARDRPSDSSSRADAFDI        | 18     | 1-44           | 1              | AAWDDSLNGYV | 11     | -          | -     | -        |
| mnCVID124 139  | 3-30   | 5-12  | 3  | 4  | AKIVHREVATTMAALNDY       | 18     | 5-52           | 3              | GTWHSNSWV   | 9      | -          | -     | -        |
|                | VH     | D     | RF | JH | CDR3 (aa)                | Length | V              | J              | CDR3 (aa)   | Length | Poly       | HEp-2 | Staining |
| mnCVID124 16   | 3-30-3 | /     | /  | 4  | ARLEG                    | 5      |                |                |             |        |            |       |          |
| mnCVID124 25   | 4-34   | 2-2   | 1  | 4  | ARVSYQLPQHFDY            | 13     |                |                |             |        |            |       |          |
| mnCVID124 65   | 3-30   | 3-3   | 1  | 4  | AKFLEPVRFFDWLLGGGYFDY    | 21     |                |                |             |        |            |       |          |
|                |        | 3-9   | 1  |    |                          |        |                |                |             |        |            |       |          |

RF, reading frame; #, antibody failed to be expressed

-, non-reactive; +, reactive; +2, highly reactive

c, diffuse cytoplasmic staining; A, actin staining; G, Golgi staining; M, mitochondria staining; N, nuclear staining

**Supplemental Table 35.** Repertoire and reactivity of antibodies from mature naive B cells of CVID patient 332.

| Ig             | HEAVY |      |    |    |                             | LIGHT  |                |                |             | REACTIVITY |      |       |          |
|----------------|-------|------|----|----|-----------------------------|--------|----------------|----------------|-------------|------------|------|-------|----------|
|                | VH    | D    | RF | JH | CDR3 (aa)                   | Length | V <sub>k</sub> | J <sub>k</sub> | CDR3 (aa)   | Length     | Poly | HEp-2 | Staining |
| mnCVID332 17   | 4-34  |      |    | 3  | ARGRRQIVRGAFDI              | 14     | 1-5            | 1              | QQYNSYRT    | 8          | +    | +2    | N        |
| mnCVID332 18   | 3-7   |      |    | 4  | ARDPKDRGFDY                 | 11     | 4-1            | 1              | QQYYSTPRT   | 9          | -    | -     | -        |
| mnCVID332 21   | 4-34  | 1-26 | 2  | 4  | ARGGSGSFLVYFDY              | 14     | 3-20           | 4              | QQYGSSPLT   | 9          | -    | -     | -        |
| mnCVID332 24   | 4-34  | 3-10 | 3  | 5  | ARRADGRPITMVRGVIIILTRKRNWFD | 28     | 3-11           | 5              | QQRSNWPS    | 8          | +    | +2    | c        |
| mnCVID332 25   | 1-69  | 6-6  | 2  | 4  | AMTRSSSSFSY                 | 12     | 1-39           | 2              | QQSYSTPPT   | 9          | +    | +     | -        |
| mnCVID332 28   | 4-34  | 6-13 | 2  | 4  | ARWVQSSSHKKFDY              | 14     | 3-11           | 4              | QQRSNWPPALT | 11         | -    | -     | -        |
| mnCVID332 30 # | 3-23  | 1-26 | 1  | 4  | AKDRWGWELLFVYFDY            | 17     | 1-12           | 3              | QQANSFPPT   | 9          |      |       |          |
| mnCVID332 32   | 4-34  | 6-19 | 2  | 5  | ARGQGRGWFD                  | 11     | 3-20           | 1              | QQYGSSPRT   | 9          | -    | -     | -        |
| mnCVID332 35 # | 4-34  | 6-13 | 3  | 4  | AREGKIAAVVVSFDY             | 16     | 3-11           | 2              | QQRSNWPRT   | 9          |      |       |          |
| mnCVID332 37   | 4-34  | 5-5  | 2  | 4  | ARGRSDSYGYIDY               | 14     | 3-20           | 1              | QQYGSSPTWT  | 10         | -    | +     | -        |
| mnCVID332 38   | 4-34  | 6-19 | 3  | 4  | ARGLPKVAGKSVDY              | 14     | 1-39           | 3              | QQSYSTPRT   | 9          | -    | +     | -        |
| mnCVID332 39   | 3-53  | 3-22 | 2  | 5  | ARGGPYYERWFD                | 14     | 3-20           | 1              | QQYGSSPPWT  | 10         | +    | -     | -        |
| mnCVID332 43   | 4-34  |      |    | 4  | ARKDIDY                     | 7      | 1-39           | 1              | QQSYSTPRT   | 9          | +    | -     | -        |
| mnCVID332 44   | 4-59  | 6-13 | 1  | 6  | ARHWGKGRQQLVPPYYGMDV        | 21     | 1-39           | 1              | QQSYSTPWT   | 9          | -    | -     | -        |
| mnCVID332 45   | 4-59  | 6-13 | 2  | 6  | ARGEYSSWYGYGMDV             | 18     | 3-20           | 2              | QQYGSSPYT   | 9          | -    | +     | c        |
| mnCVID332 47   | 4-34  |      |    | 4  | ARGLQRGYFDY                 | 11     | 3-15           | 1              | QQYNNWPRT   | 9          | -    | -     | -        |
| mnCVID332 54   | 4-34  | 6-13 | 3  | 4  | ARGPCRNCIAGKGYFDY           | 17     | 3-20           | 1              | QQYGSSPKT   | 9          | -    | -     | -        |
| mnCVID332 57 # | 4-39  | 3-3  | 2  | 1  | ARQGGGYSDFWSGPTSDFFQH       | 21     | 4-1            | 4              | QQYYSTPLT   | 9          |      |       |          |
| mnCVID332 58   | 4-34  | 1-26 | 3  | 4  | ARGHRVGATYFDY               | 13     | 1-9            | 3              | QQLNSYPPT   | 9          | -    | -     | -        |
| mnCVID332 59   | 4-34  | 1-26 | 3  | 4  | ARKVGARGYFDY                | 12     | 3-15           | 1              | QQYNNWPPWT  | 10         | -    | -     | -        |
| mnCVID332 61   | 4-34  |      |    | 4  | ARSRKNFYD                   | 10     | 1-5            | 2              | QQYNSYTT    | 8          | -    | -     | -        |
| mnCVID332 62 # | 1-3   | 3-3  | 3  | 4  | ARSHFGVVIISPFYD             | 15     | 4-1            | 1              | QQYYSTPPT   | 9          |      |       |          |
| mnCVID332 64   | 4-59  | 2-21 | 2  | 6  | ARHSENCGGDCYYYGMDV          | 21     | 3-20           | 2              | QQYGSSPYT   | 10         | -    | -     | -        |
| mnCVID332 65 # | 4-34  | 3-10 | 1  | 4  | ARGNIGTLLWFRKYYFDY          | 19     | 3-20           | 4              | QQYGSSPAT   | 9          |      |       |          |
| mnCVID332 67   | 4-34  | 6-13 | 2  | 4  | ARGRRSSSWSHLDY              | 15     | 3-20           | 1              | QQYGSSPKT   | 9          | +    | +2    | N        |
| mnCVID332 68 # | 4-34  |      |    | 4  | AICRGYFDY                   | 9      | 3-20           | 3              | QQYGSSRT    | 8          |      |       |          |
| mnCVID332 73 # | 4-34  | 3-10 | 1  | 5  | ARGEELWFRTPRKRRQGGNWFDP     | 24     | 1-39           | 2              | QQSYSTPYT   | 9          |      |       |          |
|                | VH    | D    | RF | JH | CDR3 (aa)                   | Length | V <sub>λ</sub> | J <sub>λ</sub> | CDR3 (aa)   | Length     | Poly | HEp-2 | Staining |
| mnCVID332 16 # | 4-34  | 6-13 | 2  | 5  | ARGYSSWYEVFDP               | 15     | 1-44           | 3              | AAWDDSLNR   | 9          |      |       |          |
| mnCVID332 22 # | 4-34  | 6-13 | 1  | 3  | ASWGYQQPNEGDAFDI            | 16     | 3-21           | 2              | QWDDSSDRYVV | 12         |      |       |          |
| mnCVID332 41   | 1-69  | 3-10 | 2  | 4  | ARDRSPYSGSCLDY              | 15     | 2-23           | 3              | CSYAGSSIFGV | 11         | +    | +     | G        |
| mnCVID332 48   | 4-34  | 1-26 | 2  | 4  | ARARSGSYLRQKKSFDY           | 17     | 1-51           | 2              | GTWDSLSAGGV | 12         | +    | +     | -        |
| mnCVID332 94   | 4-39  | 2-2  | 2  | 4  | ARHLLGYCSSTSCYAPRLYYFDY     | 24     | 2-14           | 3              | SSYTSSTSWV  | 11         | +    | +2    | M        |
|                | VH    | D    | RF | JH | CDR3 (aa)                   | Length | V              | J              | CDR3 (aa)   | Length     | Poly | HEp-2 | Staining |
| mnCVID332 69   | 4-34  | 3-10 | 3  | 5  | ARGRMVGVMRGTIWFDP           | 18     |                |                |             |            |      |       |          |

RF, reading frame; #, antibody failed to be expressed

-, non-reactive; +, reactive; +2, highly reactive

c, diffuse cytoplasmic staining; A, actin staining; G, Golgi staining; M, mitochondria staining; N, nuclear staining
